# Supplementary material for: Genomic Assessment of Cancer Susceptibility in the Threatened Catalina Island Fox (Urocyon littoralis catalinae)
Source: Genes (Basel). 2022 Aug 22;13(8):1496. doi: 10.3390/genes13081496 (PMC9408614; doi:10.3390/genes13081496)
Supplement: Supplementary file 1 [file genes-13-01496-s001.zip › genes-1862266-supplementary.xlsx]

## Sheet: Table S1
Table S1. Sample, sequence, alignment, and filtering statistics.
status	Species	Population	Seq_ID	Sample_ID	Sex	Year_Sampled	known year born	age at sampling	Seq_Center	Seq_Date	Seq_Type	Base Pairs (Mbp)	# of reads aligned, post-filtering (x 10^6)	Mean depth of coverage (X)	95%-ile of coverage (X)	% of reference covered by at least 6 reads
case	ULI	Santa Catalina	PHSH004A	94065	F	2006	2000	6	UC Berkeley	Current study	Illumina HiSeq4000 150 PE	53698	241	15.3227	25	91.99
case	ULI	Santa Catalina	PHSH004B	83E0C	F	2006	2002	4	UC Berkeley	Current study	Illumina HiSeq4000 150 PE	38688	170	10.7951	18	87.53
case	ULI	Santa Catalina	PHSH004C	74A72	F	2010	2005	5	UC Berkeley	Current study	Illumina HiSeq4000 150 PE	53055	237	15.0565	24	91.9
case	ULI	Santa Catalina	PHSH005A	46F1D	M	2010	<2005	minimum 6	UC Berkeley	Current study	Illumina HiSeq4000 150 PE	52311	209	13.273	22	90.02
case	ULI	Santa Catalina	PHSH005B	E5B17	F	2007	<2004	minimum 4	UC Berkeley	Current study	Illumina HiSeq4000 150 PE	47081	192	12.2243	20	89.92
case	ULI	Santa Catalina	PHSH005C	B35G	F	2002	<2000	minimum 4	UC Berkeley	Current study	Illumina HiSeq4000 150 PE	52473	224	14.2091	23	91.68
case	ULI	Santa Catalina	PHSH006A	12A20	M	2007	<2002	minimum 6	UC Berkeley	Current study	Illumina HiSeq4000 150 PE	49288	199	12.6484	21	89.39
case	ULI	Santa Catalina	PHSH006B	64D1B	F	2006	<2000	minimum 6	UC Berkeley	Current study	Illumina HiSeq4000 150 PE	61321	216	13.6927	22	90.29
case	ULI	Santa Catalina	PHSH006C	7002E	M	2004	<1999	minimum 5	UC Berkeley	Current study	Illumina HiSeq4000 150 PE	47903	179	11.3438	19	88.98
case	ULI	Santa Catalina	PHSH007H	25519	M	2006	<1998	minimum 8	UC Berkeley	Current study	Illumina HiSeq4000 150 PE	51987	247	15.6107	26	91.11
case	ULI	Santa Catalina	PHSH12A/PHSH008I	ULI-623/36966	F	2010	<2000	minimum 10	UC Berkeley	Current study	Illumina HiSeq4000 150 PE	39455	141	8.7725	41	79.45
case	ULI	Santa Catalina	PHSH12B	ULI-624/E2F58	M	2011	2005	6	UC Berkeley	Current study	Illumina HiSeq4000 150 PE	30932	156	9.6872	49	81.96
SCA control	ULI	Santa Catalina	PHSH001A	E3B7A	M	2009	2001	8	UC Berkeley	Current study	Illumina HiSeq4000 150 PE	47682	174	11.0228	19	87.29
SCA control	ULI	Santa Catalina	PHSH001B	5317D	M	2010	2008	2	UC Berkeley	Current study	Illumina HiSeq4000 150 PE	54310	194	12.3341	21	89.08
SCA control	ULI	Santa Catalina	PHSH001C	76D4D	M	2006	2000	6	UC Berkeley	Current study	Illumina HiSeq4000 150 PE	51623	195	12.3518	21	89.06
SCA control	ULI	Santa Catalina	PHSH002A	E6A0A	F	2007	2000	7	UC Berkeley	Current study	Illumina HiSeq4000 150 PE	48538	171	10.8626	18	88.12
SCA control	ULI	Santa Catalina	PHSH002B	01A24	F	2009	2003	6	UC Berkeley	Current study	Illumina HiSeq4000 150 PE	53052	186	11.783	20	89.6
SCA control	ULI	Santa Catalina	PHSH002C	53E3E	M	2007	2001	6	UC Berkeley	Current study	Illumina HiSeq4000 150 PE	51224	185	11.7151	20	88.2
SCA control	ULI	Santa Catalina	PHSH003A	4581F	M	2007	2000	7	UC Berkeley	Current study	Illumina HiSeq4000 150 PE	51430	181	11.4769	19	88.12
SCA control	ULI	Santa Catalina	PHSH003B	2770E	F	2007	2001	6	UC Berkeley	Current study	Illumina HiSeq4000 150 PE	42449	159	10.1297	17	86.41
SCA control	ULI	Santa Catalina	PHSH003C	93369	M	2007	2001	6	UC Berkeley	Current study	Illumina HiSeq4000 150 PE	57306	222	14.0851	23	90.38
SCA control	ULI	Santa Catalina	PHSH007A	16042	M	2007	2000	7	UC Berkeley	Current study	Illumina HiSeq4000 150 PE	48236	207	13.0961	22	88.58
SCA control	ULI	Santa Catalina	PHSH12C	ULI-625/70616	F	2011	2010	1	UC Berkeley	Current study	Illumina HiSeq4000 150 PE	34453	177	11.0005	50	87.24
SCLE control	ULI	San Clemente	PHSH007K	RKW13580	F	2006			UC Berkeley	Current study	Illumina HiSeq4000 150 PE	27973	129	8.1548	15	76.47
SCLE control	ULI	San Clemente	PHSH010A	RKW13701	F	2009			UC Berkeley	Current study	Illumina HiSeq4000 150 PE	32939	150	9.4755	14	83.11
SCLE control	ULI	San Clemente	PHSH010B	RKW13601	M	2006			UC Berkeley	Current study	Illumina HiSeq4000 150 PE	34185	156	9.8598	18	83.21
SCLE control	ULI	San Clemente	PHSH010C	RKW13615	M	2007			UC Berkeley	Current study	Illumina HiSeq4000 150 PE	34438	154	9.7457	17	82.8
SCLE control	ULI	San Clemente	PHSH011A	RKW13679	M	2008			UC Berkeley	Current study	Illumina HiSeq4000 150 PE	37548	174	11.0213	19	86.22
SCLE control	ULI	San Clemente	PHSH011B	RKW13716	M	2008			UC Berkeley	Current study	Illumina HiSeq4000 150 PE	27982	131	8.3208	15	75.63
SCLE control	ULI	San Clemente	PHSH011C	RKW13685	M	2009			UC Berkeley	Current study	Illumina HiSeq4000 150 PE	33645	158	10.0065	18	83.64
SCLE control	ULI	San Clemente	JARW010	RKW13704	F	2009			UC Berkeley	Robinson et al. (2018)	Illumina HiSeq4000 100 PE	69500	446	18.99	33	90.13
SCLE control	ULI	San Clemente	SRR5198013/SCLV4F	SCLV4/ RKW4045	F	1988			UC Berkeley	Robinson et al. (2016)	Illumina HiSeq 2000 100 PE	73000	124	10.5003	51	86.42
											Mean:	46553.3	190.125	11.8303	23.75	86.9978
											Stdev:	11194.1	56.8142	2.36448	9.99355	4.21789

## Sheet: Table_S2
Table S2. Mean read depth across each cohort
status	Number of individuals	Average mean depth of coverage (X)
case	12	12.72
SCA control	11	11.81
SCLE control	9	10.67
total	32

## Sheet: Table S3
Table S3. variant loci, depth, and missingness across all autosomes
# of SNPs	Ts/Tv	Mean depth per site across all individuals	Mean depth across all individuals per site	Mean proportion of missing data per individual
3945582	2.34	12.4296	397.392	0.0273347

## Sheet: Table S4
Table S4. The top 1% of loci as determined by delta pi between cases and SCA controls where cases have lower pi values than controls.
TFBS	CHROM_#	Position	Reference_allele	Alternative_allele	Quality_score	Annotation	Putative_impact	Gene_name(s)
-	1	120771031	G	C	13160	intergenic_region	MODIFIER	ENSCAFG00000033119-ZNF536
-	1	120771648	C	T	8381.38	intergenic_region	MODIFIER	ENSCAFG00000033119-ZNF536
-	1	120772253	G	A	2236.99	intergenic_region	MODIFIER	ENSCAFG00000033119-ZNF536
-	1	120772498	A	T	1868.45	intergenic_region	MODIFIER	ENSCAFG00000033119-ZNF536
-	1	120772521	G	A	1655.18	intergenic_region	MODIFIER	ENSCAFG00000033119-ZNF536
-	1	120773753	C	G	3645.56	intergenic_region	MODIFIER	ENSCAFG00000033119-ZNF536
-	1	120773787	A	T	3860.1	intergenic_region	MODIFIER	ENSCAFG00000033119-ZNF536
-	1	120774102	G	A	5976.23	intergenic_region	MODIFIER	ENSCAFG00000033119-ZNF536
-	1	120774525	G	A	5758.62	intergenic_region	MODIFIER	ENSCAFG00000033119-ZNF536
-	1	120774535	A	G	5634.4	intergenic_region	MODIFIER	ENSCAFG00000033119-ZNF536
-	1	120774754	G	A	7403.07	intergenic_region	MODIFIER	ENSCAFG00000033119-ZNF536
-	1	120775088	G	A	6190.15	intergenic_region	MODIFIER	ENSCAFG00000033119-ZNF536
-	1	120775334	G	A	2594.79	intergenic_region	MODIFIER	ENSCAFG00000033119-ZNF536
-	1	120775423	G	A	8861.63	intergenic_region	MODIFIER	ENSCAFG00000033119-ZNF536
-	1	120775452	C	T	2532.33	intergenic_region	MODIFIER	ENSCAFG00000033119-ZNF536
-	1	120775479	C	T	2298.19	intergenic_region	MODIFIER	ENSCAFG00000033119-ZNF536
-	1	120775493	G	C	2615.14	intergenic_region	MODIFIER	ENSCAFG00000033119-ZNF536
-	1	120776442	G	T	2956	intergenic_region	MODIFIER	ENSCAFG00000033119-ZNF536
-	1	120776471	G	A	1208.8	intergenic_region	MODIFIER	ENSCAFG00000033119-ZNF536
-	1	120776474	C	T	4039.57	intergenic_region	MODIFIER	ENSCAFG00000033119-ZNF536
-	1	120776572	T	C	2048.37	intergenic_region	MODIFIER	ENSCAFG00000033119-ZNF536
-	1	120776606	C	T	1864.89	intergenic_region	MODIFIER	ENSCAFG00000033119-ZNF536
-	1	120776889	A	G	3140.62	intergenic_region	MODIFIER	ENSCAFG00000033119-ZNF536
-	1	120776968	G	C	7604.89	intergenic_region	MODIFIER	ENSCAFG00000033119-ZNF536
-	1	120776984	C	T	3052.69	intergenic_region	MODIFIER	ENSCAFG00000033119-ZNF536
-	1	120777081	G	A	2402	intergenic_region	MODIFIER	ENSCAFG00000033119-ZNF536
-	1	120777084	C	T	2245.44	intergenic_region	MODIFIER	ENSCAFG00000033119-ZNF536
-	1	120777148	G	A	3313.49	intergenic_region	MODIFIER	ENSCAFG00000033119-ZNF536
-	1	120777255	G	A	2346.98	intergenic_region	MODIFIER	ENSCAFG00000033119-ZNF536
-	1	120777294	G	A	1822.87	intergenic_region	MODIFIER	ENSCAFG00000033119-ZNF536
-	1	120777345	C	T	1906.91	intergenic_region	MODIFIER	ENSCAFG00000033119-ZNF536
-	1	120777413	G	A	2130.2	intergenic_region	MODIFIER	ENSCAFG00000033119-ZNF536
-	1	120777628	T	G	7718.55	intergenic_region	MODIFIER	ENSCAFG00000033119-ZNF536
-	1	120777681	C	T	7643.81	intergenic_region	MODIFIER	ENSCAFG00000033119-ZNF536
-	1	120777797	C	T	4949.67	intergenic_region	MODIFIER	ENSCAFG00000033119-ZNF536
-	1	120777850	C	T	2173.17	intergenic_region	MODIFIER	ENSCAFG00000033119-ZNF536
-	1	120777982	T	A	3362.48	intergenic_region	MODIFIER	ENSCAFG00000033119-ZNF536
-	1	120778989	G	A	6607.18	intergenic_region	MODIFIER	ENSCAFG00000033119-ZNF536
-	1	120779023	C	T	6006.31	intergenic_region	MODIFIER	ENSCAFG00000033119-ZNF536
-	1	120779072	C	T	2630.29	intergenic_region	MODIFIER	ENSCAFG00000033119-ZNF536
-	1	120779330	C	T	3868.48	intergenic_region	MODIFIER	ENSCAFG00000033119-ZNF536
-	1	120779485	G	A	6443.59	intergenic_region	MODIFIER	ENSCAFG00000033119-ZNF536
-	1	120779494	G	A	6388.91	intergenic_region	MODIFIER	ENSCAFG00000033119-ZNF536
-	1	120779561	G	A	2634.91	intergenic_region	MODIFIER	ENSCAFG00000033119-ZNF536
-	1	120779705	C	T	2523.75	intergenic_region	MODIFIER	ENSCAFG00000033119-ZNF536
-	1	120779888	A	G	3933.98	intergenic_region	MODIFIER	ENSCAFG00000033119-ZNF536
-	1	120779942	G	A	2020.36	intergenic_region	MODIFIER	ENSCAFG00000033119-ZNF536
-	1	120780577	C	G	6128.79	intergenic_region	MODIFIER	ENSCAFG00000033119-ZNF536
-	1	120780849	C	T	2406.82	intergenic_region	MODIFIER	ENSCAFG00000033119-ZNF536
-	1	120781276	T	C	1018.07	intergenic_region	MODIFIER	ENSCAFG00000033119-ZNF536
-	1	120781277	T	C	2727.23	intergenic_region	MODIFIER	ENSCAFG00000033119-ZNF536
-	1	120781473	G	A	3666.67	intergenic_region	MODIFIER	ENSCAFG00000033119-ZNF536
-	1	120781515	C	T	624.41	intergenic_region	MODIFIER	ENSCAFG00000033119-ZNF536
-	1	120781620	A	G	6390.86	intergenic_region	MODIFIER	ENSCAFG00000033119-ZNF536
-	1	120781625	C	T	6564.53	intergenic_region	MODIFIER	ENSCAFG00000033119-ZNF536
-	1	120781733	C	T	6549.93	intergenic_region	MODIFIER	ENSCAFG00000033119-ZNF536
-	1	120781804	C	T	965.8	intergenic_region	MODIFIER	ENSCAFG00000033119-ZNF536
-	1	120781814	G	A	3824.31	intergenic_region	MODIFIER	ENSCAFG00000033119-ZNF536
-	1	120782049	G	T	4466.02	intergenic_region	MODIFIER	ENSCAFG00000033119-ZNF536
-	1	120782164	G	A	105.27	intergenic_region	MODIFIER	ENSCAFG00000033119-ZNF536
-	1	120782279	C	T	3972.17	intergenic_region	MODIFIER	ENSCAFG00000033119-ZNF536
-	1	120782319	C	T	5103.54	intergenic_region	MODIFIER	ENSCAFG00000033119-ZNF536
-	1	120782335	G	A	5999.36	intergenic_region	MODIFIER	ENSCAFG00000033119-ZNF536
-	1	120782367	G	A	3670.47	intergenic_region	MODIFIER	ENSCAFG00000033119-ZNF536
-	1	120782425	G	A	578.66	intergenic_region	MODIFIER	ENSCAFG00000033119-ZNF536
-	1	120782814	G	A	8209.78	intergenic_region	MODIFIER	ENSCAFG00000033119-ZNF536
-	1	120782821	C	T	8192.65	intergenic_region	MODIFIER	ENSCAFG00000033119-ZNF536
-	1	120782837	G	A	5106.31	intergenic_region	MODIFIER	ENSCAFG00000033119-ZNF536
-	1	120782841	G	A	5043.3	intergenic_region	MODIFIER	ENSCAFG00000033119-ZNF536
-	1	120782849	C	G	5981.97	intergenic_region	MODIFIER	ENSCAFG00000033119-ZNF536
-	1	120782859	A	G	3098.83	intergenic_region	MODIFIER	ENSCAFG00000033119-ZNF536
-	1	120782892	G	T	6365.56	intergenic_region	MODIFIER	ENSCAFG00000033119-ZNF536
-	1	120782927	G	T	9604.33	intergenic_region	MODIFIER	ENSCAFG00000033119-ZNF536
-	1	120782938	C	T	10068.9	intergenic_region	MODIFIER	ENSCAFG00000033119-ZNF536
-	1	120782995	C	T	10066	intergenic_region	MODIFIER	ENSCAFG00000033119-ZNF536
-	1	120783004	A	T	4218.4	intergenic_region	MODIFIER	ENSCAFG00000033119-ZNF536
-	1	120783014	C	A	1627.1	intergenic_region	MODIFIER	ENSCAFG00000033119-ZNF536
-	1	120783020	G	A	9912.38	intergenic_region	MODIFIER	ENSCAFG00000033119-ZNF536
-	1	120783022	C	T	1586.58	intergenic_region	MODIFIER	ENSCAFG00000033119-ZNF536
-	1	120783069	T	C	4224.08	intergenic_region	MODIFIER	ENSCAFG00000033119-ZNF536
-	1	120783131	G	A	795.66	intergenic_region	MODIFIER	ENSCAFG00000033119-ZNF536
-	1	120783146	A	G	7133.11	intergenic_region	MODIFIER	ENSCAFG00000033119-ZNF536
-	1	120783242	C	T	1178.99	intergenic_region	MODIFIER	ENSCAFG00000033119-ZNF536
-	1	120783305	C	T	7627.9	intergenic_region	MODIFIER	ENSCAFG00000033119-ZNF536
-	1	120783308	C	T	4000.57	intergenic_region	MODIFIER	ENSCAFG00000033119-ZNF536
-	1	120783313	G	A	1654.36	intergenic_region	MODIFIER	ENSCAFG00000033119-ZNF536
-	1	120783340	C	T	7408.32	intergenic_region	MODIFIER	ENSCAFG00000033119-ZNF536
-	1	120783342	G	A	1356.28	intergenic_region	MODIFIER	ENSCAFG00000033119-ZNF536
-	1	120783410	G	A	4718.56	intergenic_region	MODIFIER	ENSCAFG00000033119-ZNF536
-	1	120783628	G	A	6358.13	intergenic_region	MODIFIER	ENSCAFG00000033119-ZNF536
-	1	120783714	G	A	7527.45	intergenic_region	MODIFIER	ENSCAFG00000033119-ZNF536
-	1	120784544	G	A	2143	intergenic_region	MODIFIER	ENSCAFG00000033119-ZNF536
-	1	120784666	G	C	123.32	intergenic_region	MODIFIER	ENSCAFG00000033119-ZNF536
-	1	120784918	C	T	3909.47	intergenic_region	MODIFIER	ENSCAFG00000033119-ZNF536
-	1	120785146	A	C	783.04	intergenic_region	MODIFIER	ENSCAFG00000033119-ZNF536
-	1	120785291	A	G	8436	intergenic_region	MODIFIER	ENSCAFG00000033119-ZNF536
-	1	120785340	G	A	6160.91	intergenic_region	MODIFIER	ENSCAFG00000033119-ZNF536
-	1	120785426	C	T	3411.72	intergenic_region	MODIFIER	ENSCAFG00000033119-ZNF536
-	1	120785462	C	G	7000.54	intergenic_region	MODIFIER	ENSCAFG00000033119-ZNF536
-	1	120785466	G	A	6975.22	intergenic_region	MODIFIER	ENSCAFG00000033119-ZNF536
-	1	120785514	G	T	3573.13	intergenic_region	MODIFIER	ENSCAFG00000033119-ZNF536
-	1	120785582	G	C	7773.7	intergenic_region	MODIFIER	ENSCAFG00000033119-ZNF536
-	1	120785583	G	A	7773.65	intergenic_region	MODIFIER	ENSCAFG00000033119-ZNF536
-	1	120785604	T	C	3586.16	intergenic_region	MODIFIER	ENSCAFG00000033119-ZNF536
-	1	120785973	G	A	5660.3	intergenic_region	MODIFIER	ENSCAFG00000033119-ZNF536
-	1	120786056	G	T	3306.78	intergenic_region	MODIFIER	ENSCAFG00000033119-ZNF536
-	1	120786071	G	A	4333.35	intergenic_region	MODIFIER	ENSCAFG00000033119-ZNF536
-	1	120786134	G	A	3080.26	intergenic_region	MODIFIER	ENSCAFG00000033119-ZNF536
-	1	120786143	G	A	7152.7	intergenic_region	MODIFIER	ENSCAFG00000033119-ZNF536
-	1	120786156	C	T	6872.65	intergenic_region	MODIFIER	ENSCAFG00000033119-ZNF536
-	1	120786659	C	T	6984.43	intergenic_region	MODIFIER	ENSCAFG00000033119-ZNF536
-	1	120786761	C	T	8009.39	intergenic_region	MODIFIER	ENSCAFG00000033119-ZNF536
-	1	120786769	C	T	7814.08	intergenic_region	MODIFIER	ENSCAFG00000033119-ZNF536
-	1	120786995	C	T	4628.26	intergenic_region	MODIFIER	ENSCAFG00000033119-ZNF536
-	1	120787080	G	A	5905.84	intergenic_region	MODIFIER	ENSCAFG00000033119-ZNF536
-	1	120787191	C	T	3407.24	intergenic_region	MODIFIER	ENSCAFG00000033119-ZNF536
-	1	120788242	G	A	5166.48	intergenic_region	MODIFIER	ENSCAFG00000033119-ZNF536
-	1	120789110	C	T	902.76	intergenic_region	MODIFIER	ENSCAFG00000033119-ZNF536
-	1	120789111	G	A	5186.21	intergenic_region	MODIFIER	ENSCAFG00000033119-ZNF536
-	1	120789306	G	T	13155.7	intergenic_region	MODIFIER	ENSCAFG00000033119-ZNF536
-	1	120789780	T	G	715.18	intergenic_region	MODIFIER	ENSCAFG00000033119-ZNF536
-	1	120789790	G	A	7033.68	intergenic_region	MODIFIER	ENSCAFG00000033119-ZNF536
-	1	120789828	C	T	6775.4	intergenic_region	MODIFIER	ENSCAFG00000033119-ZNF536
-	1	120789893	C	T	3759.84	intergenic_region	MODIFIER	ENSCAFG00000033119-ZNF536
-	1	120789931	G	A	5089.55	intergenic_region	MODIFIER	ENSCAFG00000033119-ZNF536
-	1	120790201	C	A	4752.51	intergenic_region	MODIFIER	ENSCAFG00000033119-ZNF536
-	1	120790349	G	C	4559.05	intergenic_region	MODIFIER	ENSCAFG00000033119-ZNF536
-	1	120790401	G	A	1205.73	intergenic_region	MODIFIER	ENSCAFG00000033119-ZNF536
-	1	120790529	G	A	521.56	intergenic_region	MODIFIER	ENSCAFG00000033119-ZNF536
-	1	120790637	C	T	4633.6	intergenic_region	MODIFIER	ENSCAFG00000033119-ZNF536
-	1	120790902	C	G	687.94	intergenic_region	MODIFIER	ENSCAFG00000033119-ZNF536
-	1	120790929	T	C	4615.92	intergenic_region	MODIFIER	ENSCAFG00000033119-ZNF536
-	1	120791185	C	T	761.23	intergenic_region	MODIFIER	ENSCAFG00000033119-ZNF536
-	1	120791407	G	A	6074.05	intergenic_region	MODIFIER	ENSCAFG00000033119-ZNF536
-	1	120791453	G	A	6893.42	intergenic_region	MODIFIER	ENSCAFG00000033119-ZNF536
-	1	120791463	G	A	7121.48	intergenic_region	MODIFIER	ENSCAFG00000033119-ZNF536
-	1	120792050	G	A	360.7	intergenic_region	MODIFIER	ENSCAFG00000033119-ZNF536
-	1	120792213	C	G	7072.03	intergenic_region	MODIFIER	ENSCAFG00000033119-ZNF536
-	1	120792223	A	G	7352.88	intergenic_region	MODIFIER	ENSCAFG00000033119-ZNF536
-	1	120792245	G	A	4609.18	intergenic_region	MODIFIER	ENSCAFG00000033119-ZNF536
-	1	120792403	C	T	5516.83	intergenic_region	MODIFIER	ENSCAFG00000033119-ZNF536
-	1	120792437	C	T	6050.18	intergenic_region	MODIFIER	ENSCAFG00000033119-ZNF536
-	1	120792458	C	G	8829.74	intergenic_region	MODIFIER	ENSCAFG00000033119-ZNF536
-	1	120792459	A	G	8829.73	intergenic_region	MODIFIER	ENSCAFG00000033119-ZNF536
-	1	120792532	C	T	8979.5	intergenic_region	MODIFIER	ENSCAFG00000033119-ZNF536
-	1	120792621	C	T	6787.72	intergenic_region	MODIFIER	ENSCAFG00000033119-ZNF536
-	1	120792671	G	A	5238.38	intergenic_region	MODIFIER	ENSCAFG00000033119-ZNF536
-	1	120792799	G	A	6730.04	intergenic_region	MODIFIER	ENSCAFG00000033119-ZNF536
-	1	120792941	C	T	5297.45	intergenic_region	MODIFIER	ENSCAFG00000033119-ZNF536
-	1	120793000	A	G	5093.6	intergenic_region	MODIFIER	ENSCAFG00000033119-ZNF536
-	1	120793095	G	C	11832.8	intergenic_region	MODIFIER	ENSCAFG00000033119-ZNF536
-	1	120793101	G	A	7410.26	intergenic_region	MODIFIER	ENSCAFG00000033119-ZNF536
-	1	120793115	G	A	5238.81	intergenic_region	MODIFIER	ENSCAFG00000033119-ZNF536
-	1	120793439	C	G	5343.39	intergenic_region	MODIFIER	ENSCAFG00000033119-ZNF536
-	1	120793470	C	T	5169.14	intergenic_region	MODIFIER	ENSCAFG00000033119-ZNF536
-	1	120793574	C	T	4437.25	intergenic_region	MODIFIER	ENSCAFG00000033119-ZNF536
-	1	120793921	C	T	4070.76	intergenic_region	MODIFIER	ENSCAFG00000033119-ZNF536
-	1	120793972	C	T	4764.49	intergenic_region	MODIFIER	ENSCAFG00000033119-ZNF536
-	1	120794027	A	G	10685.8	intergenic_region	MODIFIER	ENSCAFG00000033119-ZNF536
-	1	120794069	G	A	4864.46	intergenic_region	MODIFIER	ENSCAFG00000033119-ZNF536
-	1	120794075	G	A	3084.38	intergenic_region	MODIFIER	ENSCAFG00000033119-ZNF536
-	1	120794084	C	G	4815.49	intergenic_region	MODIFIER	ENSCAFG00000033119-ZNF536
-	1	120794094	T	A	1856.49	intergenic_region	MODIFIER	ENSCAFG00000033119-ZNF536
-	1	120794101	G	A	5020.9	intergenic_region	MODIFIER	ENSCAFG00000033119-ZNF536
-	1	120794319	C	T	9543.21	intergenic_region	MODIFIER	ENSCAFG00000033119-ZNF536
-	1	120794356	G	A	4499.33	intergenic_region	MODIFIER	ENSCAFG00000033119-ZNF536
-	1	120794490	T	G	3500.62	intergenic_region	MODIFIER	ENSCAFG00000033119-ZNF536
-	1	120794527	T	C	5075.3	intergenic_region	MODIFIER	ENSCAFG00000033119-ZNF536
-	1	120794528	G	A	5075.23	intergenic_region	MODIFIER	ENSCAFG00000033119-ZNF536
-	1	120794711	T	A	6569.45	intergenic_region	MODIFIER	ENSCAFG00000033119-ZNF536
-	1	120794840	A	C	738.96	intergenic_region	MODIFIER	ENSCAFG00000033119-ZNF536
-	1	120795915	A	G	7481.3	intergenic_region	MODIFIER	ENSCAFG00000033119-ZNF536
-	1	120795930	C	T	4593.73	intergenic_region	MODIFIER	ENSCAFG00000033119-ZNF536
-	1	120796104	C	T	680.18	intergenic_region	MODIFIER	ENSCAFG00000033119-ZNF536
-	1	120796108	T	C	7048.73	intergenic_region	MODIFIER	ENSCAFG00000033119-ZNF536
-	1	120796162	G	A	853	intergenic_region	MODIFIER	ENSCAFG00000033119-ZNF536
-	1	120796200	G	A	5360.33	intergenic_region	MODIFIER	ENSCAFG00000033119-ZNF536
-	1	120796237	T	C	6187.06	intergenic_region	MODIFIER	ENSCAFG00000033119-ZNF536
-	1	120796253	C	T	3923.74	intergenic_region	MODIFIER	ENSCAFG00000033119-ZNF536
-	1	120796379	C	G	15673.8	intergenic_region	MODIFIER	ENSCAFG00000033119-ZNF536
-	1	120796625	G	A	782.95	intergenic_region	MODIFIER	ENSCAFG00000033119-ZNF536
-	1	120796746	G	A	705.23	intergenic_region	MODIFIER	ENSCAFG00000033119-ZNF536
-	1	120796747	C	T	4692.46	intergenic_region	MODIFIER	ENSCAFG00000033119-ZNF536
-	1	120796783	C	A	4263.49	intergenic_region	MODIFIER	ENSCAFG00000033119-ZNF536
-	1	120796817	C	T	4133.81	intergenic_region	MODIFIER	ENSCAFG00000033119-ZNF536
-	1	120796983	G	A	7015.44	intergenic_region	MODIFIER	ENSCAFG00000033119-ZNF536
-	1	120797072	G	A	8148.25	intergenic_region	MODIFIER	ENSCAFG00000033119-ZNF536
-	1	120797090	G	A	7278.52	intergenic_region	MODIFIER	ENSCAFG00000033119-ZNF536
-	1	120797103	C	T	5385.22	intergenic_region	MODIFIER	ENSCAFG00000033119-ZNF536
-	1	120797199	G	A	4676.76	intergenic_region	MODIFIER	ENSCAFG00000033119-ZNF536
-	1	120797204	G	A	3949.3	intergenic_region	MODIFIER	ENSCAFG00000033119-ZNF536
-	1	120797260	C	T	790.33	intergenic_region	MODIFIER	ENSCAFG00000033119-ZNF536
-	1	120797444	G	A	4040.35	intergenic_region	MODIFIER	ENSCAFG00000033119-ZNF536
-	1	120797458	C	T	799.16	intergenic_region	MODIFIER	ENSCAFG00000033119-ZNF536
-	1	120797551	G	C	988.56	intergenic_region	MODIFIER	ENSCAFG00000033119-ZNF536
-	1	120797658	C	T	4298.54	intergenic_region	MODIFIER	ENSCAFG00000033119-ZNF536
-	1	120797855	G	C	442.09	intergenic_region	MODIFIER	ENSCAFG00000033119-ZNF536
-	1	120797861	G	C	5824.41	intergenic_region	MODIFIER	ENSCAFG00000033119-ZNF536
-	1	120797919	C	T	490.35	intergenic_region	MODIFIER	ENSCAFG00000033119-ZNF536
-	1	120798076	G	A	4836.88	intergenic_region	MODIFIER	ENSCAFG00000033119-ZNF536
-	1	120798083	G	A	5993.26	intergenic_region	MODIFIER	ENSCAFG00000033119-ZNF536
-	1	120798226	A	G	5819.5	intergenic_region	MODIFIER	ENSCAFG00000033119-ZNF536
-	1	120798230	T	C	5842.22	intergenic_region	MODIFIER	ENSCAFG00000033119-ZNF536
-	1	120798275	G	A	6440.28	intergenic_region	MODIFIER	ENSCAFG00000033119-ZNF536
-	1	120799030	C	T	3912.48	intergenic_region	MODIFIER	ENSCAFG00000033119-ZNF536
-	1	120799044	C	T	3676.55	intergenic_region	MODIFIER	ENSCAFG00000033119-ZNF536
-	1	120799070	C	T	10036.6	intergenic_region	MODIFIER	ENSCAFG00000033119-ZNF536
-	1	120799073	T	C	4404.14	intergenic_region	MODIFIER	ENSCAFG00000033119-ZNF536
-	1	120799092	A	G	5733.8	intergenic_region	MODIFIER	ENSCAFG00000033119-ZNF536
-	1	120799126	C	G	3596.06	intergenic_region	MODIFIER	ENSCAFG00000033119-ZNF536
-	1	120799551	G	A	3964.52	intergenic_region	MODIFIER	ENSCAFG00000033119-ZNF536
-	1	120799554	C	A	4820	intergenic_region	MODIFIER	ENSCAFG00000033119-ZNF536
-	1	120799642	G	A	5388.24	intergenic_region	MODIFIER	ENSCAFG00000033119-ZNF536
-	1	120799648	C	T	5812.82	intergenic_region	MODIFIER	ENSCAFG00000033119-ZNF536
-	1	120799713	A	G	5491.73	intergenic_region	MODIFIER	ENSCAFG00000033119-ZNF536
-	1	120799721	C	T	4864.45	intergenic_region	MODIFIER	ENSCAFG00000033119-ZNF536
-	1	120799903	A	T	8356.41	intergenic_region	MODIFIER	ENSCAFG00000033119-ZNF536
-	1	120800958	G	A	5368.7	intergenic_region	MODIFIER	ENSCAFG00000033119-ZNF536
-	1	120801161	A	G	7454.22	intergenic_region	MODIFIER	ENSCAFG00000033119-ZNF536
-	1	120801353	A	G	6239.99	intergenic_region	MODIFIER	ENSCAFG00000033119-ZNF536
-	1	120801473	T	G	6086.06	intergenic_region	MODIFIER	ENSCAFG00000033119-ZNF536
-	1	120801559	G	A	5289.05	intergenic_region	MODIFIER	ENSCAFG00000033119-ZNF536
-	1	120801614	C	T	738.61	intergenic_region	MODIFIER	ENSCAFG00000033119-ZNF536
-	1	120801709	G	A	1312.24	intergenic_region	MODIFIER	ENSCAFG00000033119-ZNF536
-	1	120801994	A	C	6476.76	intergenic_region	MODIFIER	ENSCAFG00000033119-ZNF536
-	1	120802201	A	G	10904.6	intergenic_region	MODIFIER	ENSCAFG00000033119-ZNF536
-	1	120802414	C	T	286.67	intergenic_region	MODIFIER	ENSCAFG00000033119-ZNF536
-	1	120802508	G	A	4292.24	intergenic_region	MODIFIER	ENSCAFG00000033119-ZNF536
-	1	120802612	T	G	7246.59	intergenic_region	MODIFIER	ENSCAFG00000033119-ZNF536
-	1	120802724	C	T	6228.27	intergenic_region	MODIFIER	ENSCAFG00000033119-ZNF536
-	1	120803055	T	G	5915.68	intergenic_region	MODIFIER	ENSCAFG00000033119-ZNF536
-	1	120803540	G	A	160.62	intergenic_region	MODIFIER	ENSCAFG00000033119-ZNF536
-	1	120803560	C	T	5369.25	intergenic_region	MODIFIER	ENSCAFG00000033119-ZNF536
-	1	120803750	G	A	228.21	intergenic_region	MODIFIER	ENSCAFG00000033119-ZNF536
-	1	120803910	C	A	6354.49	intergenic_region	MODIFIER	ENSCAFG00000033119-ZNF536
-	1	120803989	T	C	7677.75	intergenic_region	MODIFIER	ENSCAFG00000033119-ZNF536
-	1	120804096	G	A	5178.5	intergenic_region	MODIFIER	ENSCAFG00000033119-ZNF536
-	1	120804239	C	T	4761.93	intergenic_region	MODIFIER	ENSCAFG00000033119-ZNF536
-	1	120804281	T	C	4789.89	intergenic_region	MODIFIER	ENSCAFG00000033119-ZNF536
-	1	120804950	G	A	2717.3	intergenic_region	MODIFIER	ENSCAFG00000033119-ZNF536
-	1	120804951	C	A	2717.08	intergenic_region	MODIFIER	ENSCAFG00000033119-ZNF536
-	1	120805212	G	T	6333.3	intergenic_region	MODIFIER	ENSCAFG00000033119-ZNF536
-	1	120805376	A	G	919.06	intergenic_region	MODIFIER	ENSCAFG00000033119-ZNF536
-	1	120805630	G	A	1025.87	intergenic_region	MODIFIER	ENSCAFG00000033119-ZNF536
-	1	120805698	G	C	651.14	intergenic_region	MODIFIER	ENSCAFG00000033119-ZNF536
-	1	120805785	C	A	668.61	intergenic_region	MODIFIER	ENSCAFG00000033119-ZNF536
-	1	120805827	C	T	9535.43	intergenic_region	MODIFIER	ENSCAFG00000033119-ZNF536
-	1	120807369	G	A	5019.5	intergenic_region	MODIFIER	ENSCAFG00000033119-ZNF536
-	1	120807471	C	T	5532.41	intergenic_region	MODIFIER	ENSCAFG00000033119-ZNF536
-	1	120807472	C	G	7176.03	intergenic_region	MODIFIER	ENSCAFG00000033119-ZNF536
-	1	120807508	C	T	8005.17	intergenic_region	MODIFIER	ENSCAFG00000033119-ZNF536
-	1	120807723	C	T	2560.51	intergenic_region	MODIFIER	ENSCAFG00000033119-ZNF536
-	1	120807758	G	A	6189.43	intergenic_region	MODIFIER	ENSCAFG00000033119-ZNF536
-	1	120807851	G	A	901.21	intergenic_region	MODIFIER	ENSCAFG00000033119-ZNF536
-	1	120808017	C	T	4702.29	intergenic_region	MODIFIER	ENSCAFG00000033119-ZNF536
-	1	120808049	G	A	8513.18	intergenic_region	MODIFIER	ENSCAFG00000033119-ZNF536
-	1	120808054	A	G	8651.49	intergenic_region	MODIFIER	ENSCAFG00000033119-ZNF536
-	1	120808133	C	T	1011.15	intergenic_region	MODIFIER	ENSCAFG00000033119-ZNF536
-	1	120808148	C	T	999.19	intergenic_region	MODIFIER	ENSCAFG00000033119-ZNF536
-	1	120808205	C	T	9022.45	intergenic_region	MODIFIER	ENSCAFG00000033119-ZNF536
-	1	120808288	G	A	8180.63	intergenic_region	MODIFIER	ENSCAFG00000033119-ZNF536
-	1	120808398	C	T	7195.58	intergenic_region	MODIFIER	ENSCAFG00000033119-ZNF536
-	1	120808514	A	G	9040.93	intergenic_region	MODIFIER	ENSCAFG00000033119-ZNF536
-	1	120808568	C	T	7077.62	intergenic_region	MODIFIER	ENSCAFG00000033119-ZNF536
-	1	120808708	T	C	7936.77	intergenic_region	MODIFIER	ENSCAFG00000033119-ZNF536
-	1	120808727	G	C	4678.43	intergenic_region	MODIFIER	ENSCAFG00000033119-ZNF536
-	1	120808735	A	G	5315.14	intergenic_region	MODIFIER	ENSCAFG00000033119-ZNF536
-	1	120808766	C	T	618.57	intergenic_region	MODIFIER	ENSCAFG00000033119-ZNF536
-	1	120809102	G	A	6860.44	intergenic_region	MODIFIER	ENSCAFG00000033119-ZNF536
-	1	120809108	C	T	6897.52	intergenic_region	MODIFIER	ENSCAFG00000033119-ZNF536
-	1	120809184	C	T	4310.54	intergenic_region	MODIFIER	ENSCAFG00000033119-ZNF536
-	1	120809246	C	T	5563.95	intergenic_region	MODIFIER	ENSCAFG00000033119-ZNF536
-	1	120809325	C	G	6848.73	intergenic_region	MODIFIER	ENSCAFG00000033119-ZNF536
-	1	120809401	C	T	8957.82	intergenic_region	MODIFIER	ENSCAFG00000033119-ZNF536
-	1	120809409	G	C	7016.78	intergenic_region	MODIFIER	ENSCAFG00000033119-ZNF536
-	1	120809430	T	G	5575.12	intergenic_region	MODIFIER	ENSCAFG00000033119-ZNF536
-	1	120809497	G	A	14460.5	intergenic_region	MODIFIER	ENSCAFG00000033119-ZNF536
-	1	120809576	G	A	4781.63	intergenic_region	MODIFIER	ENSCAFG00000033119-ZNF536
-	1	120809742	C	T	3352.54	intergenic_region	MODIFIER	ENSCAFG00000033119-ZNF536
-	1	120809775	G	A	854.44	intergenic_region	MODIFIER	ENSCAFG00000033119-ZNF536
-	1	120809905	C	T	3997.62	intergenic_region	MODIFIER	ENSCAFG00000033119-ZNF536
-	1	120810036	C	A	4791.85	intergenic_region	MODIFIER	ENSCAFG00000033119-ZNF536
-	1	120810172	G	A	5387.84	intergenic_region	MODIFIER	ENSCAFG00000033119-ZNF536
-	1	120810345	G	T	6817.19	intergenic_region	MODIFIER	ENSCAFG00000033119-ZNF536
-	1	120810350	G	A	6640.43	intergenic_region	MODIFIER	ENSCAFG00000033119-ZNF536
-	1	120810356	G	A	6219.9	intergenic_region	MODIFIER	ENSCAFG00000033119-ZNF536
-	1	120810724	C	T	3789.77	intergenic_region	MODIFIER	ENSCAFG00000033119-ZNF536
-	1	120810970	G	A	9000.45	intergenic_region	MODIFIER	ENSCAFG00000033119-ZNF536
-	1	120810976	C	T	8811.15	intergenic_region	MODIFIER	ENSCAFG00000033119-ZNF536
-	1	120811128	G	A	5474.07	intergenic_region	MODIFIER	ENSCAFG00000033119-ZNF536
-	1	120811135	G	T	4737.3	intergenic_region	MODIFIER	ENSCAFG00000033119-ZNF536
-	1	120811230	A	C	6636.78	intergenic_region	MODIFIER	ENSCAFG00000033119-ZNF536
-	1	120811490	G	A	5159.6	intergenic_region	MODIFIER	ENSCAFG00000033119-ZNF536
-	1	120811731	G	A	5538.06	intergenic_region	MODIFIER	ENSCAFG00000033119-ZNF536
-	1	120811898	A	T	6291.14	intergenic_region	MODIFIER	ENSCAFG00000033119-ZNF536
-	1	120812181	G	A	6030.04	intergenic_region	MODIFIER	ENSCAFG00000033119-ZNF536
-	1	120812224	C	T	4949.21	intergenic_region	MODIFIER	ENSCAFG00000033119-ZNF536
-	1	120812300	C	T	6539.85	intergenic_region	MODIFIER	ENSCAFG00000033119-ZNF536
-	1	120812426	T	C	5244.18	intergenic_region	MODIFIER	ENSCAFG00000033119-ZNF536
-	1	120812439	G	A	5942.23	intergenic_region	MODIFIER	ENSCAFG00000033119-ZNF536
-	1	120812527	A	G	7263.01	intergenic_region	MODIFIER	ENSCAFG00000033119-ZNF536
-	1	120812530	A	G	7241.72	intergenic_region	MODIFIER	ENSCAFG00000033119-ZNF536
-	1	120812927	C	T	5111.21	intergenic_region	MODIFIER	ENSCAFG00000033119-ZNF536
-	1	120813605	C	T	7103.81	intergenic_region	MODIFIER	ENSCAFG00000033119-ZNF536
-	1	120813760	C	G	5293.47	intergenic_region	MODIFIER	ENSCAFG00000033119-ZNF536
-	1	120814778	A	G	6675.8	intergenic_region	MODIFIER	ENSCAFG00000033119-ZNF536
-	1	120815915	T	C	4955.94	intergenic_region	MODIFIER	ENSCAFG00000033119-ZNF536
-	1	120816024	A	T	4826.83	intergenic_region	MODIFIER	ENSCAFG00000033119-ZNF536
-	1	120816118	G	A	6394.08	intergenic_region	MODIFIER	ENSCAFG00000033119-ZNF536
-	1	120816482	G	A	4731.58	intergenic_region	MODIFIER	ENSCAFG00000033119-ZNF536
-	1	120817271	C	T	6419.95	intergenic_region	MODIFIER	ENSCAFG00000033119-ZNF536
-	1	120817322	G	A	6358.42	intergenic_region	MODIFIER	ENSCAFG00000033119-ZNF536
-	1	120817392	G	A	6307.31	intergenic_region	MODIFIER	ENSCAFG00000033119-ZNF536
-	1	120817418	G	A	6404.06	intergenic_region	MODIFIER	ENSCAFG00000033119-ZNF536
-	1	120817839	C	T	6598.95	intergenic_region	MODIFIER	ENSCAFG00000033119-ZNF536
-	1	120817902	C	T	7071.02	intergenic_region	MODIFIER	ENSCAFG00000033119-ZNF536
-	1	120818080	C	T	3340.53	intergenic_region	MODIFIER	ENSCAFG00000033119-ZNF536
-	1	120818310	G	A	8189.93	intergenic_region	MODIFIER	ENSCAFG00000033119-ZNF536
-	1	120818676	A	T	6745.92	intergenic_region	MODIFIER	ENSCAFG00000033119-ZNF536
-	1	120818725	C	T	6225.77	intergenic_region	MODIFIER	ENSCAFG00000033119-ZNF536
-	1	120818860	A	C	6452.82	intergenic_region	MODIFIER	ENSCAFG00000033119-ZNF536
-	1	120819232	C	T	6911.47	intergenic_region	MODIFIER	ENSCAFG00000033119-ZNF536
-	1	120819343	A	C	5303.88	intergenic_region	MODIFIER	ENSCAFG00000033119-ZNF536
-	1	120819350	A	T	6791.54	intergenic_region	MODIFIER	ENSCAFG00000033119-ZNF536
-	1	120819354	C	T	6777.67	intergenic_region	MODIFIER	ENSCAFG00000033119-ZNF536
-	1	120819366	C	A	6864.17	intergenic_region	MODIFIER	ENSCAFG00000033119-ZNF536
-	1	120819375	G	C	5895.21	intergenic_region	MODIFIER	ENSCAFG00000033119-ZNF536
-	1	120819512	G	T	6313.6	intergenic_region	MODIFIER	ENSCAFG00000033119-ZNF536
-	1	120819655	C	G	5466.18	intergenic_region	MODIFIER	ENSCAFG00000033119-ZNF536
-	1	120819732	A	G	4808.43	intergenic_region	MODIFIER	ENSCAFG00000033119-ZNF536
-	1	120820051	C	T	5573.69	intergenic_region	MODIFIER	ENSCAFG00000033119-ZNF536
-	1	120820169	T	C	6105.2	intergenic_region	MODIFIER	ENSCAFG00000033119-ZNF536
-	1	120820258	C	T	5879.13	intergenic_region	MODIFIER	ENSCAFG00000033119-ZNF536
-	1	120820724	A	G	6124.74	intergenic_region	MODIFIER	ENSCAFG00000033119-ZNF536
-	1	120820741	C	T	7758.33	intergenic_region	MODIFIER	ENSCAFG00000033119-ZNF536
-	1	120820780	T	C	4970.35	intergenic_region	MODIFIER	ENSCAFG00000033119-ZNF536
-	1	120821268	A	G	3756.47	intergenic_region	MODIFIER	ENSCAFG00000033119-ZNF536
-	1	120821455	C	T	5462.6	intergenic_region	MODIFIER	ENSCAFG00000033119-ZNF536
-	1	120822219	C	T	5704.14	intergenic_region	MODIFIER	ENSCAFG00000033119-ZNF536
-	1	120822605	C	G	4374.47	intergenic_region	MODIFIER	ENSCAFG00000033119-ZNF536
-	1	120822894	A	G	7311.35	intergenic_region	MODIFIER	ENSCAFG00000033119-ZNF536
-	1	120823061	A	G	7407.52	intergenic_region	MODIFIER	ENSCAFG00000033119-ZNF536
-	1	120823070	C	T	5559.67	intergenic_region	MODIFIER	ENSCAFG00000033119-ZNF536
-	1	120823091	C	A	982.58	intergenic_region	MODIFIER	ENSCAFG00000033119-ZNF536
-	1	120823120	C	T	6821.49	intergenic_region	MODIFIER	ENSCAFG00000033119-ZNF536
-	1	120823122	G	A	5393.34	intergenic_region	MODIFIER	ENSCAFG00000033119-ZNF536
-	1	120823380	C	G	5728.02	intergenic_region	MODIFIER	ENSCAFG00000033119-ZNF536
-	1	120823402	T	C	6073.53	intergenic_region	MODIFIER	ENSCAFG00000033119-ZNF536
-	1	120823682	T	C	561.37	intergenic_region	MODIFIER	ENSCAFG00000033119-ZNF536
-	1	120823730	A	G	3954.35	intergenic_region	MODIFIER	ENSCAFG00000033119-ZNF536
-	1	120823875	T	G	4830.73	intergenic_region	MODIFIER	ENSCAFG00000033119-ZNF536
-	1	120823897	C	T	4689.7	intergenic_region	MODIFIER	ENSCAFG00000033119-ZNF536
-	1	120824063	C	T	6468.93	intergenic_region	MODIFIER	ENSCAFG00000033119-ZNF536
-	1	120824299	A	G	104.19	intergenic_region	MODIFIER	ENSCAFG00000033119-ZNF536
-	1	120824300	A	C	110.24	intergenic_region	MODIFIER	ENSCAFG00000033119-ZNF536
-	1	120825078	G	A	6307.52	intergenic_region	MODIFIER	ENSCAFG00000033119-ZNF536
-	1	120825375	T	A	4271.28	intergenic_region	MODIFIER	ENSCAFG00000033119-ZNF536
-	1	120825457	C	T	5650.3	intergenic_region	MODIFIER	ENSCAFG00000033119-ZNF536
-	1	120825522	T	G	7732.82	intergenic_region	MODIFIER	ENSCAFG00000033119-ZNF536
-	1	120825681	C	A	7068.01	intergenic_region	MODIFIER	ENSCAFG00000033119-ZNF536
-	1	120825682	G	C	3728.36	intergenic_region	MODIFIER	ENSCAFG00000033119-ZNF536
-	1	120826106	C	T	4919.96	intergenic_region	MODIFIER	ENSCAFG00000033119-ZNF536
-	1	120826295	A	G	7194.76	intergenic_region	MODIFIER	ENSCAFG00000033119-ZNF536
-	1	120826373	C	T	6712.72	intergenic_region	MODIFIER	ENSCAFG00000033119-ZNF536
-	1	120826631	G	T	2159.91	intergenic_region	MODIFIER	ENSCAFG00000033119-ZNF536
-	1	120826645	T	G	557.78	intergenic_region	MODIFIER	ENSCAFG00000033119-ZNF536
-	1	120826900	A	G	5378.42	intergenic_region	MODIFIER	ENSCAFG00000033119-ZNF536
-	1	120827470	T	G	4929.39	intergenic_region	MODIFIER	ENSCAFG00000033119-ZNF536
-	1	120827776	G	A	8673.65	intergenic_region	MODIFIER	ENSCAFG00000033119-ZNF536
-	1	120827781	T	C	6350.37	intergenic_region	MODIFIER	ENSCAFG00000033119-ZNF536
-	1	120828396	G	A	5966.58	intergenic_region	MODIFIER	ENSCAFG00000033119-ZNF536
-	1	120828542	G	A	2771.46	intergenic_region	MODIFIER	ENSCAFG00000033119-ZNF536
-	1	120829095	G	T	16008	intergenic_region	MODIFIER	ENSCAFG00000033119-ZNF536
-	1	120829399	G	A	4514.21	intergenic_region	MODIFIER	ENSCAFG00000033119-ZNF536
-	1	120829679	G	A	5652.38	intergenic_region	MODIFIER	ENSCAFG00000033119-ZNF536
-	1	120830276	C	T	5060.93	intergenic_region	MODIFIER	ENSCAFG00000033119-ZNF536
-	1	120830721	G	A	2416.33	intergenic_region	MODIFIER	ENSCAFG00000033119-ZNF536
-	1	120831592	C	T	5539.85	intergenic_region	MODIFIER	ENSCAFG00000033119-ZNF536
-	1	120831784	C	T	7514.34	intergenic_region	MODIFIER	ENSCAFG00000033119-ZNF536
-	1	120831917	G	A	5586.08	intergenic_region	MODIFIER	ENSCAFG00000033119-ZNF536
-	2	9316377	G	A	2008.31	intergenic_region	MODIFIER	KIAA1217-ENSCAFG00000036671
-	2	9316537	T	C	2923.02	intergenic_region	MODIFIER	KIAA1217-ENSCAFG00000036671
-	2	9316558	T	C	2958.05	intergenic_region	MODIFIER	KIAA1217-ENSCAFG00000036671
-	2	9317274	G	A	9974.94	intergenic_region	MODIFIER	KIAA1217-ENSCAFG00000036671
-	2	9317320	C	T	10298.7	intergenic_region	MODIFIER	KIAA1217-ENSCAFG00000036671
-	2	9317673	T	C	14374.4	intergenic_region	MODIFIER	KIAA1217-ENSCAFG00000036671
-	2	9317806	A	G	4820.29	intergenic_region	MODIFIER	KIAA1217-ENSCAFG00000036671
-	2	9318330	G	A	1660.64	intergenic_region	MODIFIER	KIAA1217-ENSCAFG00000036671
-	2	9318651	A	G	8205.25	intergenic_region	MODIFIER	KIAA1217-ENSCAFG00000036671
-	2	9319699	A	G	11142.3	intergenic_region	MODIFIER	KIAA1217-ENSCAFG00000036671
-	2	9319820	C	A	5066.23	intergenic_region	MODIFIER	KIAA1217-ENSCAFG00000036671
-	2	9321697	C	T	2006.42	intergenic_region	MODIFIER	KIAA1217-ENSCAFG00000036671
-	2	9324313	G	A	8132.54	intergenic_region	MODIFIER	KIAA1217-ENSCAFG00000036671
-	2	9324754	T	G	1694.2	intergenic_region	MODIFIER	KIAA1217-ENSCAFG00000036671
-	2	9324772	G	T	1571.84	intergenic_region	MODIFIER	KIAA1217-ENSCAFG00000036671
-	2	9324820	T	C	13658.6	intergenic_region	MODIFIER	KIAA1217-ENSCAFG00000036671
-	2	9324890	T	C	1812.42	intergenic_region	MODIFIER	KIAA1217-ENSCAFG00000036671
-	2	9325136	T	C	12788.9	intergenic_region	MODIFIER	KIAA1217-ENSCAFG00000036671
-	2	9325743	A	G	8494.94	intergenic_region	MODIFIER	KIAA1217-ENSCAFG00000036671
-	2	9326721	G	T	10721.3	intergenic_region	MODIFIER	KIAA1217-ENSCAFG00000036671
-	2	9327574	T	G	14295.2	intergenic_region	MODIFIER	KIAA1217-ENSCAFG00000036671
-	2	9327608	C	T	2011.43	intergenic_region	MODIFIER	KIAA1217-ENSCAFG00000036671
-	2	9327711	T	C	1745.45	intergenic_region	MODIFIER	KIAA1217-ENSCAFG00000036671
-	2	9327924	G	A	11734.4	intergenic_region	MODIFIER	KIAA1217-ENSCAFG00000036671
-	2	9327985	C	T	1641.32	intergenic_region	MODIFIER	KIAA1217-ENSCAFG00000036671
-	2	9328298	C	G	1696.19	intergenic_region	MODIFIER	KIAA1217-ENSCAFG00000036671
-	2	9328328	C	T	1809.66	intergenic_region	MODIFIER	KIAA1217-ENSCAFG00000036671
-	2	9328615	T	C	12303.6	intergenic_region	MODIFIER	KIAA1217-ENSCAFG00000036671
-	2	9328769	C	T	9468.36	intergenic_region	MODIFIER	KIAA1217-ENSCAFG00000036671
-	2	9328777	A	G	2923.44	intergenic_region	MODIFIER	KIAA1217-ENSCAFG00000036671
-	2	9328787	T	C	3037.79	intergenic_region	MODIFIER	KIAA1217-ENSCAFG00000036671
-	2	9329233	A	G	1643.15	intergenic_region	MODIFIER	KIAA1217-ENSCAFG00000036671
-	2	9329926	C	T	10626.4	intergenic_region	MODIFIER	KIAA1217-ENSCAFG00000036671
-	2	9330186	G	C	175.8	intergenic_region	MODIFIER	KIAA1217-ENSCAFG00000036671
-	2	9330431	A	G	8069.81	intergenic_region	MODIFIER	KIAA1217-ENSCAFG00000036671
-	2	9330994	T	C	1838.53	intergenic_region	MODIFIER	KIAA1217-ENSCAFG00000036671
-	2	9331195	G	A	14234.4	intergenic_region	MODIFIER	KIAA1217-ENSCAFG00000036671
-	2	9331335	T	C	13284.5	intergenic_region	MODIFIER	KIAA1217-ENSCAFG00000036671
-	2	9332762	T	C	10455.5	intergenic_region	MODIFIER	KIAA1217-ENSCAFG00000036671
-	2	9333143	C	T	9001.3	intergenic_region	MODIFIER	KIAA1217-ENSCAFG00000036671
-	2	9334203	G	A	12529.5	intergenic_region	MODIFIER	KIAA1217-ENSCAFG00000036671
-	2	9334324	C	G	10191.5	intergenic_region	MODIFIER	KIAA1217-ENSCAFG00000036671
-	2	9334584	G	A	14367.3	intergenic_region	MODIFIER	KIAA1217-ENSCAFG00000036671
-	2	9334593	A	T	14656.3	intergenic_region	MODIFIER	KIAA1217-ENSCAFG00000036671
-	2	9336269	G	A	8468.03	intergenic_region	MODIFIER	KIAA1217-ENSCAFG00000036671
-	2	9336410	C	G	1749.85	intergenic_region	MODIFIER	KIAA1217-ENSCAFG00000036671
-	2	9336934	G	A	9467.74	intergenic_region	MODIFIER	KIAA1217-ENSCAFG00000036671
-	2	9337362	G	A	1821.05	intergenic_region	MODIFIER	KIAA1217-ENSCAFG00000036671
-	2	9339706	A	C	2623.83	intergenic_region	MODIFIER	KIAA1217-ENSCAFG00000036671
-	2	9339707	G	C	2623.61	intergenic_region	MODIFIER	KIAA1217-ENSCAFG00000036671
-	2	9341619	A	G	2177.55	intergenic_region	MODIFIER	KIAA1217-ENSCAFG00000036671
TFBS	2	9341724	T	C	1324.95	intergenic_region	MODIFIER	KIAA1217-ENSCAFG00000036671
-	2	9341789	T	A	12848	intergenic_region	MODIFIER	KIAA1217-ENSCAFG00000036671
-	2	9341871	C	T	1488.61	intergenic_region	MODIFIER	KIAA1217-ENSCAFG00000036671
-	2	9341909	C	T	14062.1	intergenic_region	MODIFIER	KIAA1217-ENSCAFG00000036671
-	2	9341976	C	T	10631.6	intergenic_region	MODIFIER	KIAA1217-ENSCAFG00000036671
-	2	9341988	C	T	1826.04	intergenic_region	MODIFIER	KIAA1217-ENSCAFG00000036671
-	2	9342090	A	C	16243	intergenic_region	MODIFIER	KIAA1217-ENSCAFG00000036671
-	2	9342093	A	T	16520	intergenic_region	MODIFIER	KIAA1217-ENSCAFG00000036671
-	2	9342112	A	G	15214.5	intergenic_region	MODIFIER	KIAA1217-ENSCAFG00000036671
-	2	9342159	G	A	1761.84	intergenic_region	MODIFIER	KIAA1217-ENSCAFG00000036671
-	2	9342168	G	A	10266.8	intergenic_region	MODIFIER	KIAA1217-ENSCAFG00000036671
-	2	9342508	C	T	9621.98	intergenic_region	MODIFIER	KIAA1217-ENSCAFG00000036671
-	2	9342620	G	A	10935.3	intergenic_region	MODIFIER	KIAA1217-ENSCAFG00000036671
-	2	9343331	G	A	12993.4	intergenic_region	MODIFIER	KIAA1217-ENSCAFG00000036671
-	2	9343620	G	A	12792.9	intergenic_region	MODIFIER	KIAA1217-ENSCAFG00000036671
-	2	9343621	A	T	12567.9	intergenic_region	MODIFIER	KIAA1217-ENSCAFG00000036671
-	2	9343870	A	G	7368.17	intergenic_region	MODIFIER	KIAA1217-ENSCAFG00000036671
-	2	9344519	C	T	11577.7	intergenic_region	MODIFIER	KIAA1217-ENSCAFG00000036671
-	2	9345292	T	C	9111.13	intergenic_region	MODIFIER	KIAA1217-ENSCAFG00000036671
-	2	9345351	T	C	1811.69	intergenic_region	MODIFIER	KIAA1217-ENSCAFG00000036671
-	2	9345929	A	T	1730.93	intergenic_region	MODIFIER	KIAA1217-ENSCAFG00000036671
-	2	9346437	C	T	1621.59	intergenic_region	MODIFIER	KIAA1217-ENSCAFG00000036671
-	2	9346894	C	T	1417.16	intergenic_region	MODIFIER	KIAA1217-ENSCAFG00000036671
-	2	9347096	C	T	7853.59	intergenic_region	MODIFIER	KIAA1217-ENSCAFG00000036671
-	2	9347136	A	C	2696.77	intergenic_region	MODIFIER	KIAA1217-ENSCAFG00000036671
-	2	9347219	G	A	1371.49	intergenic_region	MODIFIER	KIAA1217-ENSCAFG00000036671
-	2	9347298	C	T	9344.41	intergenic_region	MODIFIER	KIAA1217-ENSCAFG00000036671
-	2	9347385	A	T	9147.39	intergenic_region	MODIFIER	KIAA1217-ENSCAFG00000036671
-	2	9348220	T	C	1426.52	intergenic_region	MODIFIER	KIAA1217-ENSCAFG00000036671
-	2	9348299	C	T	1716.75	intergenic_region	MODIFIER	KIAA1217-ENSCAFG00000036671
-	2	9348766	A	C	1121.61	intergenic_region	MODIFIER	KIAA1217-ENSCAFG00000036671
-	2	9348777	T	C	1302.79	intergenic_region	MODIFIER	KIAA1217-ENSCAFG00000036671
-	2	9349333	C	T	1344.73	intergenic_region	MODIFIER	KIAA1217-ENSCAFG00000036671
-	2	9349402	C	T	7908.91	intergenic_region	MODIFIER	KIAA1217-ENSCAFG00000036671
-	2	9349407	C	T	9153.45	intergenic_region	MODIFIER	KIAA1217-ENSCAFG00000036671
-	2	9350051	A	T	11973.8	intergenic_region	MODIFIER	KIAA1217-ENSCAFG00000036671
-	2	9350214	T	G	11896.1	intergenic_region	MODIFIER	KIAA1217-ENSCAFG00000036671
-	2	9350420	T	C	14266.3	intergenic_region	MODIFIER	KIAA1217-ENSCAFG00000036671
-	2	9350514	T	C	13223.4	intergenic_region	MODIFIER	KIAA1217-ENSCAFG00000036671
-	2	9350687	A	G	12018.5	intergenic_region	MODIFIER	KIAA1217-ENSCAFG00000036671
-	2	9350797	C	T	1590.87	intergenic_region	MODIFIER	KIAA1217-ENSCAFG00000036671
-	2	9350892	G	A	2262.47	intergenic_region	MODIFIER	KIAA1217-ENSCAFG00000036671
-	2	9350927	C	T	1931.55	intergenic_region	MODIFIER	KIAA1217-ENSCAFG00000036671
-	2	9351087	C	T	1537.89	intergenic_region	MODIFIER	KIAA1217-ENSCAFG00000036671
-	2	9351205	T	A	1646.96	intergenic_region	MODIFIER	KIAA1217-ENSCAFG00000036671
-	2	9351372	T	C	9509.33	intergenic_region	MODIFIER	KIAA1217-ENSCAFG00000036671
-	2	9351615	T	G	12681.8	intergenic_region	MODIFIER	KIAA1217-ENSCAFG00000036671
-	2	9351639	T	A	12976.5	intergenic_region	MODIFIER	KIAA1217-ENSCAFG00000036671
-	2	9351738	A	G	1911.49	intergenic_region	MODIFIER	KIAA1217-ENSCAFG00000036671
-	2	9352025	G	T	3053.47	intergenic_region	MODIFIER	KIAA1217-ENSCAFG00000036671
-	2	9352316	G	A	1785.65	intergenic_region	MODIFIER	KIAA1217-ENSCAFG00000036671
-	2	9352540	C	A	7169.14	intergenic_region	MODIFIER	KIAA1217-ENSCAFG00000036671
-	2	9352611	A	G	7583.03	intergenic_region	MODIFIER	KIAA1217-ENSCAFG00000036671
-	2	9352668	T	C	1408.9	intergenic_region	MODIFIER	KIAA1217-ENSCAFG00000036671
-	2	9352704	T	A	1865.58	intergenic_region	MODIFIER	KIAA1217-ENSCAFG00000036671
-	2	9352748	A	C	1807.52	intergenic_region	MODIFIER	KIAA1217-ENSCAFG00000036671
-	2	9352768	C	T	1970.57	intergenic_region	MODIFIER	KIAA1217-ENSCAFG00000036671
-	2	9352857	A	G	11926.2	intergenic_region	MODIFIER	KIAA1217-ENSCAFG00000036671
-	2	9352952	G	A	1913.15	intergenic_region	MODIFIER	KIAA1217-ENSCAFG00000036671
-	2	9353421	A	G	1989.13	intergenic_region	MODIFIER	KIAA1217-ENSCAFG00000036671
-	2	9353456	G	A	2109.57	intergenic_region	MODIFIER	KIAA1217-ENSCAFG00000036671
-	2	9353537	G	A	9830.71	intergenic_region	MODIFIER	KIAA1217-ENSCAFG00000036671
-	2	9353685	A	C	12150.9	intergenic_region	MODIFIER	KIAA1217-ENSCAFG00000036671
-	2	9353779	T	C	13892.8	intergenic_region	MODIFIER	KIAA1217-ENSCAFG00000036671
-	2	9354165	T	C	2161.62	intergenic_region	MODIFIER	KIAA1217-ENSCAFG00000036671
-	2	9354250	T	C	9760.62	intergenic_region	MODIFIER	KIAA1217-ENSCAFG00000036671
-	2	9354282	C	T	12739.3	intergenic_region	MODIFIER	KIAA1217-ENSCAFG00000036671
-	2	9354286	T	C	12813.8	intergenic_region	MODIFIER	KIAA1217-ENSCAFG00000036671
-	2	9354309	A	G	1080.71	intergenic_region	MODIFIER	KIAA1217-ENSCAFG00000036671
-	2	9354494	T	C	6138.15	intergenic_region	MODIFIER	KIAA1217-ENSCAFG00000036671
-	2	9354580	T	C	936.38	intergenic_region	MODIFIER	KIAA1217-ENSCAFG00000036671
-	2	9355333	A	G	2083.82	intergenic_region	MODIFIER	KIAA1217-ENSCAFG00000036671
-	2	9355497	C	A	12896.9	intergenic_region	MODIFIER	KIAA1217-ENSCAFG00000036671
-	2	9355550	C	T	1845.56	intergenic_region	MODIFIER	KIAA1217-ENSCAFG00000036671
-	2	9355662	C	T	10699.5	intergenic_region	MODIFIER	KIAA1217-ENSCAFG00000036671
-	2	9355757	A	G	1778.09	intergenic_region	MODIFIER	KIAA1217-ENSCAFG00000036671
-	2	9355904	G	T	9587.32	intergenic_region	MODIFIER	KIAA1217-ENSCAFG00000036671
-	2	9356199	A	T	12663.6	intergenic_region	MODIFIER	KIAA1217-ENSCAFG00000036671
-	2	9356350	T	C	3230.05	intergenic_region	MODIFIER	KIAA1217-ENSCAFG00000036671
-	2	9356365	C	T	12688.6	intergenic_region	MODIFIER	KIAA1217-ENSCAFG00000036671
-	2	9356394	T	A	12664	intergenic_region	MODIFIER	KIAA1217-ENSCAFG00000036671
-	2	9356444	C	T	2000.7	intergenic_region	MODIFIER	KIAA1217-ENSCAFG00000036671
-	2	9356841	A	C	9956.53	intergenic_region	MODIFIER	KIAA1217-ENSCAFG00000036671
-	2	9356849	C	T	2050.96	intergenic_region	MODIFIER	KIAA1217-ENSCAFG00000036671
-	2	9356919	C	T	2311.14	intergenic_region	MODIFIER	KIAA1217-ENSCAFG00000036671
-	2	9356925	G	C	12399.8	intergenic_region	MODIFIER	KIAA1217-ENSCAFG00000036671
-	2	9357066	C	T	1735.07	intergenic_region	MODIFIER	KIAA1217-ENSCAFG00000036671
-	2	9357193	A	G	13557.4	intergenic_region	MODIFIER	KIAA1217-ENSCAFG00000036671
-	2	9357204	C	A	1643.46	intergenic_region	MODIFIER	KIAA1217-ENSCAFG00000036671
-	2	9357226	T	G	14011.7	intergenic_region	MODIFIER	KIAA1217-ENSCAFG00000036671
-	2	9357242	G	A	13693.2	intergenic_region	MODIFIER	KIAA1217-ENSCAFG00000036671
-	2	9357321	T	A	2754.42	intergenic_region	MODIFIER	KIAA1217-ENSCAFG00000036671
-	2	9357333	T	C	2697.02	intergenic_region	MODIFIER	KIAA1217-ENSCAFG00000036671
-	2	9357346	A	C	2323.06	intergenic_region	MODIFIER	KIAA1217-ENSCAFG00000036671
-	2	9357356	C	G	584.22	intergenic_region	MODIFIER	KIAA1217-ENSCAFG00000036671
-	2	9357489	G	C	2242.62	intergenic_region	MODIFIER	KIAA1217-ENSCAFG00000036671
-	2	9357710	T	C	1937.56	intergenic_region	MODIFIER	KIAA1217-ENSCAFG00000036671
-	2	9357796	T	A	14807.9	intergenic_region	MODIFIER	KIAA1217-ENSCAFG00000036671
-	2	9357818	A	T	2580.93	intergenic_region	MODIFIER	KIAA1217-ENSCAFG00000036671
-	2	9357954	G	A	1929.02	intergenic_region	MODIFIER	KIAA1217-ENSCAFG00000036671
-	2	9358056	G	C	2084.92	intergenic_region	MODIFIER	KIAA1217-ENSCAFG00000036671
-	2	9358380	C	T	12950.8	intergenic_region	MODIFIER	KIAA1217-ENSCAFG00000036671
-	2	9358551	G	A	9856.55	intergenic_region	MODIFIER	KIAA1217-ENSCAFG00000036671
-	2	9358629	T	C	2471.79	intergenic_region	MODIFIER	KIAA1217-ENSCAFG00000036671
-	2	9358714	A	G	9152.56	intergenic_region	MODIFIER	KIAA1217-ENSCAFG00000036671
-	2	9358761	G	A	845.25	intergenic_region	MODIFIER	KIAA1217-ENSCAFG00000036671
-	2	9358851	T	A	12662.7	intergenic_region	MODIFIER	KIAA1217-ENSCAFG00000036671
-	2	9358869	G	T	3171.44	intergenic_region	MODIFIER	KIAA1217-ENSCAFG00000036671
-	2	9358976	C	T	1915.47	intergenic_region	MODIFIER	KIAA1217-ENSCAFG00000036671
-	2	9359017	C	A	12477	intergenic_region	MODIFIER	KIAA1217-ENSCAFG00000036671
-	2	9359040	T	G	11246.4	intergenic_region	MODIFIER	KIAA1217-ENSCAFG00000036671
-	2	9359323	C	T	9645.4	intergenic_region	MODIFIER	KIAA1217-ENSCAFG00000036671
-	2	9359433	C	T	1911.79	intergenic_region	MODIFIER	KIAA1217-ENSCAFG00000036671
-	2	9359522	C	T	1726.05	intergenic_region	MODIFIER	KIAA1217-ENSCAFG00000036671
-	2	9359614	C	G	13055.5	intergenic_region	MODIFIER	KIAA1217-ENSCAFG00000036671
-	2	9359632	C	T	2127.75	intergenic_region	MODIFIER	KIAA1217-ENSCAFG00000036671
-	2	9359725	A	G	9924	intergenic_region	MODIFIER	KIAA1217-ENSCAFG00000036671
-	2	9359736	A	C	2665.91	intergenic_region	MODIFIER	KIAA1217-ENSCAFG00000036671
-	2	9359835	T	C	9227.26	intergenic_region	MODIFIER	KIAA1217-ENSCAFG00000036671
-	2	9359898	C	A	13603.5	intergenic_region	MODIFIER	KIAA1217-ENSCAFG00000036671
-	2	9359943	G	C	2407.16	intergenic_region	MODIFIER	KIAA1217-ENSCAFG00000036671
-	2	9359952	T	C	2337	intergenic_region	MODIFIER	KIAA1217-ENSCAFG00000036671
-	2	9359991	G	T	10818.5	intergenic_region	MODIFIER	KIAA1217-ENSCAFG00000036671
-	2	9360060	A	G	12475.4	intergenic_region	MODIFIER	KIAA1217-ENSCAFG00000036671
-	2	9360068	T	G	12400.1	intergenic_region	MODIFIER	KIAA1217-ENSCAFG00000036671
-	2	9360086	C	T	9621.86	intergenic_region	MODIFIER	KIAA1217-ENSCAFG00000036671
-	2	9360128	A	T	11152.4	intergenic_region	MODIFIER	KIAA1217-ENSCAFG00000036671
-	2	9360191	C	T	9960.25	intergenic_region	MODIFIER	KIAA1217-ENSCAFG00000036671
-	2	9360206	G	A	10337.9	intergenic_region	MODIFIER	KIAA1217-ENSCAFG00000036671
-	2	9360253	C	T	15117.5	intergenic_region	MODIFIER	KIAA1217-ENSCAFG00000036671
-	2	9360628	G	A	11591.2	intergenic_region	MODIFIER	KIAA1217-ENSCAFG00000036671
-	2	9360759	T	C	1317.9	intergenic_region	MODIFIER	KIAA1217-ENSCAFG00000036671
-	2	9361364	T	C	1446.54	intergenic_region	MODIFIER	KIAA1217-ENSCAFG00000036671
-	2	9361565	A	G	1844.62	intergenic_region	MODIFIER	KIAA1217-ENSCAFG00000036671
-	2	9362102	G	A	10249.5	intergenic_region	MODIFIER	KIAA1217-ENSCAFG00000036671
-	2	9362257	T	A	3471.85	intergenic_region	MODIFIER	KIAA1217-ENSCAFG00000036671
-	2	9362266	T	A	3512.75	intergenic_region	MODIFIER	KIAA1217-ENSCAFG00000036671
-	2	9362700	T	C	580.5	intergenic_region	MODIFIER	KIAA1217-ENSCAFG00000036671
-	2	9362771	G	A	980.27	intergenic_region	MODIFIER	KIAA1217-ENSCAFG00000036671
-	2	9362811	C	T	1338.15	intergenic_region	MODIFIER	KIAA1217-ENSCAFG00000036671
-	2	9363149	A	G	11868	intergenic_region	MODIFIER	KIAA1217-ENSCAFG00000036671
-	2	9363480	A	C	2100.88	intergenic_region	MODIFIER	KIAA1217-ENSCAFG00000036671
-	2	9363851	A	G	2179.33	intergenic_region	MODIFIER	KIAA1217-ENSCAFG00000036671
-	2	9364077	G	A	14353.4	intergenic_region	MODIFIER	KIAA1217-ENSCAFG00000036671
-	2	9364111	C	T	10989.4	intergenic_region	MODIFIER	KIAA1217-ENSCAFG00000036671
-	2	9364113	T	G	2114.43	intergenic_region	MODIFIER	KIAA1217-ENSCAFG00000036671
-	2	9364245	T	A	8494.07	intergenic_region	MODIFIER	KIAA1217-ENSCAFG00000036671
-	2	9364982	T	C	6699.66	intergenic_region	MODIFIER	KIAA1217-ENSCAFG00000036671
-	2	9364992	A	G	1612.22	intergenic_region	MODIFIER	KIAA1217-ENSCAFG00000036671
-	2	9365171	G	A	1802.62	intergenic_region	MODIFIER	KIAA1217-ENSCAFG00000036671
-	2	9365217	G	C	11196.1	intergenic_region	MODIFIER	KIAA1217-ENSCAFG00000036671
-	2	60680980	C	T	1404.55	intergenic_region	MODIFIER	IRX6-ENSCAFG00000036802
-	2	60680982	A	G	10092.6	intergenic_region	MODIFIER	IRX6-ENSCAFG00000036802
-	2	60681085	T	G	562.63	intergenic_region	MODIFIER	IRX6-ENSCAFG00000036802
-	2	60681492	G	C	1004.83	intergenic_region	MODIFIER	IRX6-ENSCAFG00000036802
-	2	60681534	C	T	13808.5	intergenic_region	MODIFIER	IRX6-ENSCAFG00000036802
-	2	60681757	G	A	5126.93	intergenic_region	MODIFIER	IRX6-ENSCAFG00000036802
-	2	60682069	T	C	859.06	intergenic_region	MODIFIER	IRX6-ENSCAFG00000036802
-	2	60682657	T	C	11832.5	intergenic_region	MODIFIER	IRX6-ENSCAFG00000036802
-	2	60682658	G	A	1766.77	intergenic_region	MODIFIER	IRX6-ENSCAFG00000036802
-	2	60683940	G	C	11973.9	intergenic_region	MODIFIER	IRX6-ENSCAFG00000036802
-	2	60684423	T	A	15148.9	intergenic_region	MODIFIER	IRX6-ENSCAFG00000036802
-	2	60684431	C	A	15520.8	intergenic_region	MODIFIER	IRX6-ENSCAFG00000036802
-	2	60684445	C	T	1400.16	intergenic_region	MODIFIER	IRX6-ENSCAFG00000036802
-	2	60684530	G	A	15627.1	intergenic_region	MODIFIER	IRX6-ENSCAFG00000036802
-	2	60684611	A	G	1037.15	intergenic_region	MODIFIER	IRX6-ENSCAFG00000036802
-	2	60684651	C	T	1198.58	intergenic_region	MODIFIER	IRX6-ENSCAFG00000036802
-	2	60684733	A	T	10657.1	intergenic_region	MODIFIER	IRX6-ENSCAFG00000036802
-	2	60684760	G	A	10324.6	intergenic_region	MODIFIER	IRX6-ENSCAFG00000036802
-	2	60684802	A	G	1224.95	intergenic_region	MODIFIER	IRX6-ENSCAFG00000036802
-	2	60685820	A	G	849.11	upstream_gene_variant	MODIFIER	ENSCAFG00000036802
-	2	60685886	G	C	13240.5	upstream_gene_variant	MODIFIER	ENSCAFG00000036802
-	2	60685973	G	A	1277.6	upstream_gene_variant	MODIFIER	ENSCAFG00000036802
-	2	60686030	T	A	1491.44	upstream_gene_variant	MODIFIER	ENSCAFG00000036802
-	2	60686093	G	A	1410.46	upstream_gene_variant	MODIFIER	ENSCAFG00000036802
-	2	60686186	A	G	9025.33	upstream_gene_variant	MODIFIER	ENSCAFG00000036802
-	2	60686269	G	A	1546.47	upstream_gene_variant	MODIFIER	ENSCAFG00000036802
-	2	60686412	T	C	747.75	upstream_gene_variant	MODIFIER	ENSCAFG00000036802
-	2	60686512	G	C	833.06	upstream_gene_variant	MODIFIER	ENSCAFG00000036802
-	2	60686709	C	T	9200.49	upstream_gene_variant	MODIFIER	ENSCAFG00000036802
-	2	60686722	C	T	1042.62	upstream_gene_variant	MODIFIER	ENSCAFG00000036802
-	2	60687752	T	C	1918.59	upstream_gene_variant	MODIFIER	ENSCAFG00000036802
-	2	60687883	G	A	12360.2	upstream_gene_variant	MODIFIER	ENSCAFG00000036802
-	2	60687915	T	C	7736.72	upstream_gene_variant	MODIFIER	ENSCAFG00000036802
-	2	60688673	A	T	799.86	upstream_gene_variant	MODIFIER	ENSCAFG00000036802
-	2	60688812	C	T	14123	upstream_gene_variant	MODIFIER	ENSCAFG00000036802
-	2	60688941	T	C	1367.61	upstream_gene_variant	MODIFIER	ENSCAFG00000036802
-	2	60689947	G	A	1294.41	upstream_gene_variant	MODIFIER	ENSCAFG00000036802
-	2	60690309	A	G	888.97	upstream_gene_variant	MODIFIER	ENSCAFG00000036802
-	2	60691182	G	A	9761.82	non_coding_transcript_exon_variant	MODIFIER	ENSCAFG00000036802
-	2	60691388	T	C	1449.57	non_coding_transcript_exon_variant	MODIFIER	ENSCAFG00000036802
-	2	60691618	C	T	10391.6	non_coding_transcript_exon_variant	MODIFIER	ENSCAFG00000036802
-	2	60692077	C	T	1210.4	non_coding_transcript_exon_variant	MODIFIER	ENSCAFG00000036802
-	2	60692334	C	T	1387.8	non_coding_transcript_exon_variant	MODIFIER	ENSCAFG00000036802
-	2	60692446	C	A	16680.2	downstream_gene_variant	MODIFIER	ENSCAFG00000036802
-	2	60692459	T	C	1587.3	downstream_gene_variant	MODIFIER	ENSCAFG00000036802
-	2	60692503	T	C	1299.26	downstream_gene_variant	MODIFIER	ENSCAFG00000036802
-	2	60692904	A	C	1085.31	downstream_gene_variant	MODIFIER	ENSCAFG00000036802
-	2	60692976	G	A	14279.5	downstream_gene_variant	MODIFIER	ENSCAFG00000036802
-	2	60693023	A	G	13545.3	downstream_gene_variant	MODIFIER	ENSCAFG00000036802
-	2	60693047	A	G	15962.2	downstream_gene_variant	MODIFIER	ENSCAFG00000036802
-	2	60693628	C	T	1508.42	downstream_gene_variant	MODIFIER	ENSCAFG00000036802
-	2	60693651	G	C	1763.34	downstream_gene_variant	MODIFIER	ENSCAFG00000036802
-	2	60694671	T	C	13053.8	downstream_gene_variant	MODIFIER	ENSCAFG00000036802
-	2	60695104	C	T	9879.11	downstream_gene_variant	MODIFIER	ENSCAFG00000036802
-	2	60695758	C	T	10746.4	downstream_gene_variant	MODIFIER	ENSCAFG00000036802
-	2	60695857	T	C	1049.1	downstream_gene_variant	MODIFIER	ENSCAFG00000036802
-	2	60695964	C	T	11628.7	downstream_gene_variant	MODIFIER	ENSCAFG00000036802
-	2	60696018	A	G	1122.32	downstream_gene_variant	MODIFIER	ENSCAFG00000036802
-	2	60696102	A	T	886.62	downstream_gene_variant	MODIFIER	ENSCAFG00000036802
-	2	60696162	G	C	1146.59	downstream_gene_variant	MODIFIER	ENSCAFG00000036802
-	2	60696422	C	T	1087.15	downstream_gene_variant	MODIFIER	ENSCAFG00000036802
-	2	60697749	C	T	14895	intergenic_region	MODIFIER	ENSCAFG00000036802-ENSCAFG00000039597
-	2	60698001	C	G	917.75	intergenic_region	MODIFIER	ENSCAFG00000036802-ENSCAFG00000039597
-	2	60698173	T	G	1055.64	intergenic_region	MODIFIER	ENSCAFG00000036802-ENSCAFG00000039597
-	2	60698346	C	T	1265.3	intergenic_region	MODIFIER	ENSCAFG00000036802-ENSCAFG00000039597
-	2	60698642	A	G	641.7	intergenic_region	MODIFIER	ENSCAFG00000036802-ENSCAFG00000039597
-	2	60698674	G	A	17180.1	intergenic_region	MODIFIER	ENSCAFG00000036802-ENSCAFG00000039597
-	2	60698762	C	T	1794.78	intergenic_region	MODIFIER	ENSCAFG00000036802-ENSCAFG00000039597
-	2	60698763	A	G	13010.3	intergenic_region	MODIFIER	ENSCAFG00000036802-ENSCAFG00000039597
-	2	60699509	C	T	11634.5	intergenic_region	MODIFIER	ENSCAFG00000036802-ENSCAFG00000039597
-	2	60699731	G	A	10156.2	intergenic_region	MODIFIER	ENSCAFG00000036802-ENSCAFG00000039597
-	2	60699768	T	A	13007.2	intergenic_region	MODIFIER	ENSCAFG00000036802-ENSCAFG00000039597
-	2	60699881	C	T	1681.66	intergenic_region	MODIFIER	ENSCAFG00000036802-ENSCAFG00000039597
-	2	60699904	G	A	1626.64	intergenic_region	MODIFIER	ENSCAFG00000036802-ENSCAFG00000039597
-	2	60699924	C	T	10999.5	intergenic_region	MODIFIER	ENSCAFG00000036802-ENSCAFG00000039597
-	2	60700035	T	G	12622.9	intergenic_region	MODIFIER	ENSCAFG00000036802-ENSCAFG00000039597
-	2	60700365	G	T	13061.7	intergenic_region	MODIFIER	ENSCAFG00000036802-ENSCAFG00000039597
-	2	60700553	A	G	653.55	intergenic_region	MODIFIER	ENSCAFG00000036802-ENSCAFG00000039597
-	2	60700714	G	A	9418.33	intergenic_region	MODIFIER	ENSCAFG00000036802-ENSCAFG00000039597
-	2	60700756	G	A	10239.7	intergenic_region	MODIFIER	ENSCAFG00000036802-ENSCAFG00000039597
-	2	60701503	G	A	1407.03	intergenic_region	MODIFIER	ENSCAFG00000036802-ENSCAFG00000039597
-	2	60701538	G	A	14002.4	intergenic_region	MODIFIER	ENSCAFG00000036802-ENSCAFG00000039597
-	2	60701725	A	C	14142.4	intergenic_region	MODIFIER	ENSCAFG00000036802-ENSCAFG00000039597
-	2	60701802	T	C	1575.56	intergenic_region	MODIFIER	ENSCAFG00000036802-ENSCAFG00000039597
-	2	60701854	C	G	11633.3	intergenic_region	MODIFIER	ENSCAFG00000036802-ENSCAFG00000039597
-	2	60702822	T	C	16285.5	intergenic_region	MODIFIER	ENSCAFG00000036802-ENSCAFG00000039597
-	2	60702823	T	A	16285.5	intergenic_region	MODIFIER	ENSCAFG00000036802-ENSCAFG00000039597
-	2	60702894	C	A	306.26	intergenic_region	MODIFIER	ENSCAFG00000036802-ENSCAFG00000039597
-	2	60703648	T	C	12242.9	intergenic_region	MODIFIER	ENSCAFG00000036802-ENSCAFG00000039597
-	2	60703752	C	T	11276.5	intergenic_region	MODIFIER	ENSCAFG00000036802-ENSCAFG00000039597
-	2	60704788	C	T	11905.2	intergenic_region	MODIFIER	ENSCAFG00000036802-ENSCAFG00000039597
-	2	60705694	C	T	16757.5	intergenic_region	MODIFIER	ENSCAFG00000036802-ENSCAFG00000039597
-	2	60705785	T	C	10218.2	intergenic_region	MODIFIER	ENSCAFG00000036802-ENSCAFG00000039597
-	2	60706017	T	C	11670.7	intergenic_region	MODIFIER	ENSCAFG00000036802-ENSCAFG00000039597
-	2	60706363	G	T	1301.6	intergenic_region	MODIFIER	ENSCAFG00000036802-ENSCAFG00000039597
-	2	60706558	G	C	1212.45	intergenic_region	MODIFIER	ENSCAFG00000036802-ENSCAFG00000039597
-	2	60706559	A	T	1212.49	intergenic_region	MODIFIER	ENSCAFG00000036802-ENSCAFG00000039597
-	2	60706618	A	G	1271.87	intergenic_region	MODIFIER	ENSCAFG00000036802-ENSCAFG00000039597
-	2	60706956	C	T	435.99	intergenic_region	MODIFIER	ENSCAFG00000036802-ENSCAFG00000039597
-	2	60707298	A	T	9871.5	intergenic_region	MODIFIER	ENSCAFG00000036802-ENSCAFG00000039597
-	2	60707334	A	G	1101.55	intergenic_region	MODIFIER	ENSCAFG00000036802-ENSCAFG00000039597
-	2	60708032	C	T	13200.6	intergenic_region	MODIFIER	ENSCAFG00000036802-ENSCAFG00000039597
-	2	60708111	T	A	11331.3	intergenic_region	MODIFIER	ENSCAFG00000036802-ENSCAFG00000039597
-	2	60708112	T	A	11365.3	intergenic_region	MODIFIER	ENSCAFG00000036802-ENSCAFG00000039597
-	2	60708561	T	A	11959.6	intergenic_region	MODIFIER	ENSCAFG00000036802-ENSCAFG00000039597
-	2	60708591	G	A	11924.4	intergenic_region	MODIFIER	ENSCAFG00000036802-ENSCAFG00000039597
-	2	60708634	T	G	13110.2	intergenic_region	MODIFIER	ENSCAFG00000036802-ENSCAFG00000039597
-	2	60708904	G	A	11095.6	intergenic_region	MODIFIER	ENSCAFG00000036802-ENSCAFG00000039597
-	2	60709143	A	C	1097.16	intergenic_region	MODIFIER	ENSCAFG00000036802-ENSCAFG00000039597
-	2	60709220	T	C	995.52	intergenic_region	MODIFIER	ENSCAFG00000036802-ENSCAFG00000039597
-	2	60709768	G	A	872.94	intergenic_region	MODIFIER	ENSCAFG00000036802-ENSCAFG00000039597
-	2	60709791	C	T	10943.1	intergenic_region	MODIFIER	ENSCAFG00000036802-ENSCAFG00000039597
-	2	60709937	C	T	15714.2	intergenic_region	MODIFIER	ENSCAFG00000036802-ENSCAFG00000039597
-	2	60711240	C	A	15279.5	intergenic_region	MODIFIER	ENSCAFG00000036802-ENSCAFG00000039597
-	2	60711260	C	T	13427.5	intergenic_region	MODIFIER	ENSCAFG00000036802-ENSCAFG00000039597
-	2	60711316	C	T	1203.71	intergenic_region	MODIFIER	ENSCAFG00000036802-ENSCAFG00000039597
-	2	60711631	C	T	784.88	intergenic_region	MODIFIER	ENSCAFG00000036802-ENSCAFG00000039597
-	2	60711668	C	G	9702.98	intergenic_region	MODIFIER	ENSCAFG00000036802-ENSCAFG00000039597
-	2	60711739	T	C	827.7	intergenic_region	MODIFIER	ENSCAFG00000036802-ENSCAFG00000039597
-	2	60711877	T	C	9170.16	intergenic_region	MODIFIER	ENSCAFG00000036802-ENSCAFG00000039597
-	2	60711957	A	G	9121.34	intergenic_region	MODIFIER	ENSCAFG00000036802-ENSCAFG00000039597
-	2	60711979	C	T	1539.75	intergenic_region	MODIFIER	ENSCAFG00000036802-ENSCAFG00000039597
-	2	60713817	C	A	12096.5	intergenic_region	MODIFIER	ENSCAFG00000036802-ENSCAFG00000039597
-	2	60713909	A	T	1005.02	intergenic_region	MODIFIER	ENSCAFG00000036802-ENSCAFG00000039597
-	2	60713910	T	A	7767.32	intergenic_region	MODIFIER	ENSCAFG00000036802-ENSCAFG00000039597
-	2	60714063	C	T	8856.92	intergenic_region	MODIFIER	ENSCAFG00000036802-ENSCAFG00000039597
-	2	60714606	T	C	18312.7	intergenic_region	MODIFIER	ENSCAFG00000036802-ENSCAFG00000039597
-	2	60715002	G	C	16542.6	intergenic_region	MODIFIER	ENSCAFG00000036802-ENSCAFG00000039597
-	2	60715143	G	A	14852.7	intergenic_region	MODIFIER	ENSCAFG00000036802-ENSCAFG00000039597
-	2	60715206	T	A	10928.7	intergenic_region	MODIFIER	ENSCAFG00000036802-ENSCAFG00000039597
-	2	60715785	A	T	14768.4	intergenic_region	MODIFIER	ENSCAFG00000036802-ENSCAFG00000039597
-	2	60716143	G	A	17636.6	intergenic_region	MODIFIER	ENSCAFG00000036802-ENSCAFG00000039597
-	2	60716894	G	A	1652.97	intergenic_region	MODIFIER	ENSCAFG00000036802-ENSCAFG00000039597
-	2	60717021	C	T	1028.3	intergenic_region	MODIFIER	ENSCAFG00000036802-ENSCAFG00000039597
-	2	60717835	A	G	11135.8	intergenic_region	MODIFIER	ENSCAFG00000036802-ENSCAFG00000039597
-	2	60718073	T	G	1451.58	intergenic_region	MODIFIER	ENSCAFG00000036802-ENSCAFG00000039597
-	2	60718158	G	A	977.74	intergenic_region	MODIFIER	ENSCAFG00000036802-ENSCAFG00000039597
-	2	60718259	C	T	809.91	intergenic_region	MODIFIER	ENSCAFG00000036802-ENSCAFG00000039597
-	2	60718342	C	T	1190.7	intergenic_region	MODIFIER	ENSCAFG00000036802-ENSCAFG00000039597
-	2	60718386	A	G	10550	intergenic_region	MODIFIER	ENSCAFG00000036802-ENSCAFG00000039597
-	2	60718674	T	C	12464.5	intergenic_region	MODIFIER	ENSCAFG00000036802-ENSCAFG00000039597
-	2	60718965	A	G	9911.81	intergenic_region	MODIFIER	ENSCAFG00000036802-ENSCAFG00000039597
-	2	60719130	G	A	774.08	intergenic_region	MODIFIER	ENSCAFG00000036802-ENSCAFG00000039597
-	2	60719232	T	C	988.75	intergenic_region	MODIFIER	ENSCAFG00000036802-ENSCAFG00000039597
-	2	60719271	C	T	1067.98	intergenic_region	MODIFIER	ENSCAFG00000036802-ENSCAFG00000039597
-	2	60719516	G	A	1708.39	intergenic_region	MODIFIER	ENSCAFG00000036802-ENSCAFG00000039597
-	2	60719756	T	G	1402.83	intergenic_region	MODIFIER	ENSCAFG00000036802-ENSCAFG00000039597
-	2	60719895	G	T	9959.7	intergenic_region	MODIFIER	ENSCAFG00000036802-ENSCAFG00000039597
-	2	60719934	C	T	14921.6	intergenic_region	MODIFIER	ENSCAFG00000036802-ENSCAFG00000039597
-	2	60720324	A	G	1148.04	intergenic_region	MODIFIER	ENSCAFG00000036802-ENSCAFG00000039597
-	2	60720356	G	A	1291.88	intergenic_region	MODIFIER	ENSCAFG00000036802-ENSCAFG00000039597
-	2	60720624	G	A	1290.11	intergenic_region	MODIFIER	ENSCAFG00000036802-ENSCAFG00000039597
-	2	60720798	A	T	15195.4	intergenic_region	MODIFIER	ENSCAFG00000036802-ENSCAFG00000039597
-	2	60721105	T	A	1165.71	intergenic_region	MODIFIER	ENSCAFG00000036802-ENSCAFG00000039597
-	2	60721195	C	T	14537.1	intergenic_region	MODIFIER	ENSCAFG00000036802-ENSCAFG00000039597
-	2	60721232	C	T	1034.4	intergenic_region	MODIFIER	ENSCAFG00000036802-ENSCAFG00000039597
-	2	60721654	C	T	11680.8	intergenic_region	MODIFIER	ENSCAFG00000036802-ENSCAFG00000039597
-	2	60721799	C	T	9966.74	intergenic_region	MODIFIER	ENSCAFG00000036802-ENSCAFG00000039597
-	2	60721823	T	C	1025.65	intergenic_region	MODIFIER	ENSCAFG00000036802-ENSCAFG00000039597
-	2	60722169	T	C	1645.76	intergenic_region	MODIFIER	ENSCAFG00000036802-ENSCAFG00000039597
-	2	60722252	T	C	1579.41	intergenic_region	MODIFIER	ENSCAFG00000036802-ENSCAFG00000039597
-	2	60722327	G	A	1164.05	intergenic_region	MODIFIER	ENSCAFG00000036802-ENSCAFG00000039597
-	2	60722449	A	G	12078.4	intergenic_region	MODIFIER	ENSCAFG00000036802-ENSCAFG00000039597
-	2	60722590	A	G	1216.04	intergenic_region	MODIFIER	ENSCAFG00000036802-ENSCAFG00000039597
-	2	60723019	A	G	11265.8	intergenic_region	MODIFIER	ENSCAFG00000036802-ENSCAFG00000039597
-	2	60723241	G	A	1752.52	intergenic_region	MODIFIER	ENSCAFG00000036802-ENSCAFG00000039597
-	2	60723538	T	G	1376.91	intergenic_region	MODIFIER	ENSCAFG00000036802-ENSCAFG00000039597
-	2	60723818	T	A	1328.38	intergenic_region	MODIFIER	ENSCAFG00000036802-ENSCAFG00000039597
-	2	60723916	T	C	10989.5	intergenic_region	MODIFIER	ENSCAFG00000036802-ENSCAFG00000039597
-	2	60724019	G	A	13994.2	intergenic_region	MODIFIER	ENSCAFG00000036802-ENSCAFG00000039597
-	2	60724083	C	T	14686.7	intergenic_region	MODIFIER	ENSCAFG00000036802-ENSCAFG00000039597
-	2	60724343	G	A	9317.38	intergenic_region	MODIFIER	ENSCAFG00000036802-ENSCAFG00000039597
-	2	60724426	T	C	983.3	intergenic_region	MODIFIER	ENSCAFG00000036802-ENSCAFG00000039597
-	2	60724459	G	A	1342.94	intergenic_region	MODIFIER	ENSCAFG00000036802-ENSCAFG00000039597
-	2	60724464	T	C	1313.88	intergenic_region	MODIFIER	ENSCAFG00000036802-ENSCAFG00000039597
-	2	60724677	A	G	1333.26	intergenic_region	MODIFIER	ENSCAFG00000036802-ENSCAFG00000039597
-	2	60724722	C	T	1198.04	intergenic_region	MODIFIER	ENSCAFG00000036802-ENSCAFG00000039597
-	2	60724799	A	C	10679	intergenic_region	MODIFIER	ENSCAFG00000036802-ENSCAFG00000039597
-	2	60725235	T	C	1148.02	intergenic_region	MODIFIER	ENSCAFG00000036802-ENSCAFG00000039597
-	2	60725572	T	C	1448.95	intergenic_region	MODIFIER	ENSCAFG00000036802-ENSCAFG00000039597
-	2	60725769	C	T	10941.5	intergenic_region	MODIFIER	ENSCAFG00000036802-ENSCAFG00000039597
-	2	60725832	T	C	1132.94	intergenic_region	MODIFIER	ENSCAFG00000036802-ENSCAFG00000039597
-	2	60726452	C	T	15404.4	intergenic_region	MODIFIER	ENSCAFG00000036802-ENSCAFG00000039597
-	2	60726867	T	C	1689.35	intergenic_region	MODIFIER	ENSCAFG00000036802-ENSCAFG00000039597
-	2	60726921	T	C	1322.68	intergenic_region	MODIFIER	ENSCAFG00000036802-ENSCAFG00000039597
-	2	60727271	A	G	1381.86	intergenic_region	MODIFIER	ENSCAFG00000036802-ENSCAFG00000039597
-	2	60727381	T	C	1150.08	intergenic_region	MODIFIER	ENSCAFG00000036802-ENSCAFG00000039597
-	2	60727623	T	G	11045.5	intergenic_region	MODIFIER	ENSCAFG00000036802-ENSCAFG00000039597
-	2	60727873	T	C	14789.7	intergenic_region	MODIFIER	ENSCAFG00000036802-ENSCAFG00000039597
-	2	60728650	C	T	14950.7	intergenic_region	MODIFIER	ENSCAFG00000036802-ENSCAFG00000039597
-	2	60729224	G	A	1168.79	intergenic_region	MODIFIER	ENSCAFG00000036802-ENSCAFG00000039597
-	2	60729300	T	C	1241.67	intergenic_region	MODIFIER	ENSCAFG00000036802-ENSCAFG00000039597
-	2	60729317	G	A	11472.5	intergenic_region	MODIFIER	ENSCAFG00000036802-ENSCAFG00000039597
-	2	60729396	G	A	1380.46	intergenic_region	MODIFIER	ENSCAFG00000036802-ENSCAFG00000039597
-	2	60729551	A	C	12359	intergenic_region	MODIFIER	ENSCAFG00000036802-ENSCAFG00000039597
-	2	60729580	T	C	11660.8	intergenic_region	MODIFIER	ENSCAFG00000036802-ENSCAFG00000039597
-	2	60729681	C	T	9825.13	intergenic_region	MODIFIER	ENSCAFG00000036802-ENSCAFG00000039597
-	2	60729802	G	A	1047.58	intergenic_region	MODIFIER	ENSCAFG00000036802-ENSCAFG00000039597
-	2	60729972	C	T	921.15	intergenic_region	MODIFIER	ENSCAFG00000036802-ENSCAFG00000039597
-	2	60730171	T	A	9662.14	intergenic_region	MODIFIER	ENSCAFG00000036802-ENSCAFG00000039597
-	2	60730204	G	A	13583.8	intergenic_region	MODIFIER	ENSCAFG00000036802-ENSCAFG00000039597
-	2	60730263	G	A	13947	intergenic_region	MODIFIER	ENSCAFG00000036802-ENSCAFG00000039597
-	2	60730394	C	T	1818.03	intergenic_region	MODIFIER	ENSCAFG00000036802-ENSCAFG00000039597
-	2	60730605	G	A	1247.6	intergenic_region	MODIFIER	ENSCAFG00000036802-ENSCAFG00000039597
-	2	60730790	A	G	1442.08	intergenic_region	MODIFIER	ENSCAFG00000036802-ENSCAFG00000039597
-	2	60730835	G	T	9790.52	intergenic_region	MODIFIER	ENSCAFG00000036802-ENSCAFG00000039597
-	2	60730872	A	G	7792.37	intergenic_region	MODIFIER	ENSCAFG00000036802-ENSCAFG00000039597
-	2	60730909	G	A	1713.73	intergenic_region	MODIFIER	ENSCAFG00000036802-ENSCAFG00000039597
-	2	60730982	T	A	10243.4	intergenic_region	MODIFIER	ENSCAFG00000036802-ENSCAFG00000039597
-	2	60731144	C	T	13753.8	intergenic_region	MODIFIER	ENSCAFG00000036802-ENSCAFG00000039597
-	2	60731172	G	A	14551.8	intergenic_region	MODIFIER	ENSCAFG00000036802-ENSCAFG00000039597
-	2	60731191	G	A	15509.8	intergenic_region	MODIFIER	ENSCAFG00000036802-ENSCAFG00000039597
-	2	60731201	C	T	15148.8	intergenic_region	MODIFIER	ENSCAFG00000036802-ENSCAFG00000039597
-	2	60731283	G	A	10058.6	intergenic_region	MODIFIER	ENSCAFG00000036802-ENSCAFG00000039597
-	2	60731436	T	C	2010.2	intergenic_region	MODIFIER	ENSCAFG00000036802-ENSCAFG00000039597
-	2	60731609	C	T	946.6	intergenic_region	MODIFIER	ENSCAFG00000036802-ENSCAFG00000039597
-	2	60731680	T	C	1808.04	intergenic_region	MODIFIER	ENSCAFG00000036802-ENSCAFG00000039597
-	2	60731692	C	T	1808.07	intergenic_region	MODIFIER	ENSCAFG00000036802-ENSCAFG00000039597
-	2	60731807	G	T	1968.92	intergenic_region	MODIFIER	ENSCAFG00000036802-ENSCAFG00000039597
-	2	60731833	C	T	15878.6	intergenic_region	MODIFIER	ENSCAFG00000036802-ENSCAFG00000039597
-	2	60731936	T	C	1194.18	intergenic_region	MODIFIER	ENSCAFG00000036802-ENSCAFG00000039597
-	2	60732130	A	G	1511.23	intergenic_region	MODIFIER	ENSCAFG00000036802-ENSCAFG00000039597
-	2	60732137	G	T	1485.27	intergenic_region	MODIFIER	ENSCAFG00000036802-ENSCAFG00000039597
-	2	60732665	A	G	12978.1	intergenic_region	MODIFIER	ENSCAFG00000036802-ENSCAFG00000039597
-	2	60732780	C	T	9466.79	intergenic_region	MODIFIER	ENSCAFG00000036802-ENSCAFG00000039597
-	2	60732928	C	T	1715.6	intergenic_region	MODIFIER	ENSCAFG00000036802-ENSCAFG00000039597
-	2	60733038	A	G	1240.31	intergenic_region	MODIFIER	ENSCAFG00000036802-ENSCAFG00000039597
-	2	60733094	A	T	13307	intergenic_region	MODIFIER	ENSCAFG00000036802-ENSCAFG00000039597
-	2	60733196	G	A	1917.58	intergenic_region	MODIFIER	ENSCAFG00000036802-ENSCAFG00000039597
-	2	60733207	T	C	1904.14	intergenic_region	MODIFIER	ENSCAFG00000036802-ENSCAFG00000039597
-	2	60733348	T	G	13417.2	intergenic_region	MODIFIER	ENSCAFG00000036802-ENSCAFG00000039597
-	2	60734245	T	A	1106.81	intergenic_region	MODIFIER	ENSCAFG00000036802-ENSCAFG00000039597
-	2	60734424	G	A	1636.54	intergenic_region	MODIFIER	ENSCAFG00000036802-ENSCAFG00000039597
-	2	60734611	C	T	1624.37	intergenic_region	MODIFIER	ENSCAFG00000036802-ENSCAFG00000039597
-	2	60735570	G	A	1462.03	intergenic_region	MODIFIER	ENSCAFG00000036802-ENSCAFG00000039597
-	2	60735928	T	A	1548.76	intergenic_region	MODIFIER	ENSCAFG00000036802-ENSCAFG00000039597
-	2	60736415	T	C	17076	intergenic_region	MODIFIER	ENSCAFG00000036802-ENSCAFG00000039597
-	2	60736951	T	C	1448.78	intergenic_region	MODIFIER	ENSCAFG00000036802-ENSCAFG00000039597
-	2	60737137	T	A	808.8	intergenic_region	MODIFIER	ENSCAFG00000036802-ENSCAFG00000039597
-	2	60737583	T	C	1737.55	intergenic_region	MODIFIER	ENSCAFG00000036802-ENSCAFG00000039597
-	2	60737624	G	A	16802.5	intergenic_region	MODIFIER	ENSCAFG00000036802-ENSCAFG00000039597
-	2	60737749	C	T	11060	intergenic_region	MODIFIER	ENSCAFG00000036802-ENSCAFG00000039597
-	2	60737906	T	C	11419.7	intergenic_region	MODIFIER	ENSCAFG00000036802-ENSCAFG00000039597
-	2	60737948	C	T	10124.9	intergenic_region	MODIFIER	ENSCAFG00000036802-ENSCAFG00000039597
-	2	60737953	T	G	16812.4	intergenic_region	MODIFIER	ENSCAFG00000036802-ENSCAFG00000039597
-	2	60737959	T	C	16865.4	intergenic_region	MODIFIER	ENSCAFG00000036802-ENSCAFG00000039597
-	2	60738073	G	C	1652.06	intergenic_region	MODIFIER	ENSCAFG00000036802-ENSCAFG00000039597
-	2	60738155	C	T	1542.53	intergenic_region	MODIFIER	ENSCAFG00000036802-ENSCAFG00000039597
-	2	60738175	T	C	8605.42	intergenic_region	MODIFIER	ENSCAFG00000036802-ENSCAFG00000039597
-	2	60738264	A	G	1503.46	intergenic_region	MODIFIER	ENSCAFG00000036802-ENSCAFG00000039597
-	2	60738387	C	A	1442	intergenic_region	MODIFIER	ENSCAFG00000036802-ENSCAFG00000039597
-	2	60738425	A	G	1508.72	intergenic_region	MODIFIER	ENSCAFG00000036802-ENSCAFG00000039597
-	2	60738458	G	T	11148.3	intergenic_region	MODIFIER	ENSCAFG00000036802-ENSCAFG00000039597
-	2	60738621	C	T	1252.26	intergenic_region	MODIFIER	ENSCAFG00000036802-ENSCAFG00000039597
-	2	60738622	G	A	10708.2	intergenic_region	MODIFIER	ENSCAFG00000036802-ENSCAFG00000039597
-	2	60738653	T	G	1371.11	intergenic_region	MODIFIER	ENSCAFG00000036802-ENSCAFG00000039597
-	2	60738746	G	T	15136.7	intergenic_region	MODIFIER	ENSCAFG00000036802-ENSCAFG00000039597
-	2	60739440	G	C	1986.68	intergenic_region	MODIFIER	ENSCAFG00000036802-ENSCAFG00000039597
-	2	60739465	T	C	2780.84	intergenic_region	MODIFIER	ENSCAFG00000036802-ENSCAFG00000039597
-	2	60739689	T	C	1794.43	intergenic_region	MODIFIER	ENSCAFG00000036802-ENSCAFG00000039597
-	2	60739749	T	C	15038.4	intergenic_region	MODIFIER	ENSCAFG00000036802-ENSCAFG00000039597
-	2	60739773	T	G	2197.19	intergenic_region	MODIFIER	ENSCAFG00000036802-ENSCAFG00000039597
-	2	60739824	A	C	1278.74	intergenic_region	MODIFIER	ENSCAFG00000036802-ENSCAFG00000039597
-	2	60740240	T	A	14700.7	intergenic_region	MODIFIER	ENSCAFG00000036802-ENSCAFG00000039597
-	2	60740313	G	A	10816.6	intergenic_region	MODIFIER	ENSCAFG00000036802-ENSCAFG00000039597
-	2	60741034	C	G	12874.2	intergenic_region	MODIFIER	ENSCAFG00000036802-ENSCAFG00000039597
-	2	60741043	G	A	12597.9	intergenic_region	MODIFIER	ENSCAFG00000036802-ENSCAFG00000039597
-	2	60741455	G	A	1260.31	intergenic_region	MODIFIER	ENSCAFG00000036802-ENSCAFG00000039597
-	2	60741516	C	T	1313.76	intergenic_region	MODIFIER	ENSCAFG00000036802-ENSCAFG00000039597
-	2	60741617	G	T	1062.97	intergenic_region	MODIFIER	ENSCAFG00000036802-ENSCAFG00000039597
-	2	60741842	C	T	1553.41	intergenic_region	MODIFIER	ENSCAFG00000036802-ENSCAFG00000039597
-	2	60741846	T	A	1212.94	intergenic_region	MODIFIER	ENSCAFG00000036802-ENSCAFG00000039597
-	2	60741979	C	T	1712.03	intergenic_region	MODIFIER	ENSCAFG00000036802-ENSCAFG00000039597
-	2	60742070	G	A	11611.5	intergenic_region	MODIFIER	ENSCAFG00000036802-ENSCAFG00000039597
-	2	60742556	A	G	14163.8	intergenic_region	MODIFIER	ENSCAFG00000036802-ENSCAFG00000039597
-	2	60742577	A	G	13541.7	intergenic_region	MODIFIER	ENSCAFG00000036802-ENSCAFG00000039597
-	2	60742898	T	C	1290.31	intergenic_region	MODIFIER	ENSCAFG00000036802-ENSCAFG00000039597
-	2	60743459	C	T	15465.5	intergenic_region	MODIFIER	ENSCAFG00000036802-ENSCAFG00000039597
-	2	60743486	T	C	1056.32	intergenic_region	MODIFIER	ENSCAFG00000036802-ENSCAFG00000039597
-	2	60743563	G	A	1281.29	intergenic_region	MODIFIER	ENSCAFG00000036802-ENSCAFG00000039597
-	2	60743581	G	A	1411.47	intergenic_region	MODIFIER	ENSCAFG00000036802-ENSCAFG00000039597
-	2	60744356	A	G	1504.24	intergenic_region	MODIFIER	ENSCAFG00000036802-ENSCAFG00000039597
-	2	60744498	T	C	12195.9	intergenic_region	MODIFIER	ENSCAFG00000036802-ENSCAFG00000039597
-	2	60744505	T	C	12656.7	intergenic_region	MODIFIER	ENSCAFG00000036802-ENSCAFG00000039597
-	2	60744574	G	A	1016.09	intergenic_region	MODIFIER	ENSCAFG00000036802-ENSCAFG00000039597
-	2	60745032	A	T	1534.48	intergenic_region	MODIFIER	ENSCAFG00000036802-ENSCAFG00000039597
-	2	60745093	C	T	1822.16	intergenic_region	MODIFIER	ENSCAFG00000036802-ENSCAFG00000039597
-	2	60747428	C	T	9642.35	intergenic_region	MODIFIER	ENSCAFG00000036802-ENSCAFG00000039597
-	2	60747887	G	A	10573.5	intergenic_region	MODIFIER	ENSCAFG00000036802-ENSCAFG00000039597
-	2	60747971	T	A	551.24	intergenic_region	MODIFIER	ENSCAFG00000036802-ENSCAFG00000039597
-	2	60748280	C	T	1833.84	intergenic_region	MODIFIER	ENSCAFG00000036802-ENSCAFG00000039597
-	2	60748293	G	A	1378.04	intergenic_region	MODIFIER	ENSCAFG00000036802-ENSCAFG00000039597
-	2	60748526	C	T	972.88	intergenic_region	MODIFIER	ENSCAFG00000036802-ENSCAFG00000039597
-	2	60748839	G	C	1461.53	intergenic_region	MODIFIER	ENSCAFG00000036802-ENSCAFG00000039597
-	2	60749096	T	C	1504.76	intergenic_region	MODIFIER	ENSCAFG00000036802-ENSCAFG00000039597
-	2	60749279	A	G	11561.9	intergenic_region	MODIFIER	ENSCAFG00000036802-ENSCAFG00000039597
-	2	60749390	C	T	870.18	intergenic_region	MODIFIER	ENSCAFG00000036802-ENSCAFG00000039597
-	2	60749433	G	A	880.85	intergenic_region	MODIFIER	ENSCAFG00000036802-ENSCAFG00000039597
-	2	60749444	C	T	9975.95	intergenic_region	MODIFIER	ENSCAFG00000036802-ENSCAFG00000039597
-	2	60749455	G	C	9946.85	intergenic_region	MODIFIER	ENSCAFG00000036802-ENSCAFG00000039597
-	2	60749474	A	C	1115.81	intergenic_region	MODIFIER	ENSCAFG00000036802-ENSCAFG00000039597
-	2	60749714	A	G	1098.81	intergenic_region	MODIFIER	ENSCAFG00000036802-ENSCAFG00000039597
-	2	60750097	T	A	6938.84	intergenic_region	MODIFIER	ENSCAFG00000036802-ENSCAFG00000039597
-	2	60750624	A	C	13185.8	intergenic_region	MODIFIER	ENSCAFG00000036802-ENSCAFG00000039597
-	2	60750742	G	A	15440.4	intergenic_region	MODIFIER	ENSCAFG00000036802-ENSCAFG00000039597
-	2	60751026	G	A	1764.57	intergenic_region	MODIFIER	ENSCAFG00000036802-ENSCAFG00000039597
-	2	60751907	G	A	1421.96	intergenic_region	MODIFIER	ENSCAFG00000036802-ENSCAFG00000039597
-	2	60751987	C	T	12727.5	intergenic_region	MODIFIER	ENSCAFG00000036802-ENSCAFG00000039597
-	2	60752294	G	A	898.33	intergenic_region	MODIFIER	ENSCAFG00000036802-ENSCAFG00000039597
-	2	60752353	G	A	1168.17	intergenic_region	MODIFIER	ENSCAFG00000036802-ENSCAFG00000039597
-	2	60754539	A	G	3228.29	intergenic_region	MODIFIER	ENSCAFG00000036802-ENSCAFG00000039597
-	2	60754737	C	G	9799.03	intergenic_region	MODIFIER	ENSCAFG00000036802-ENSCAFG00000039597
-	2	60754891	T	C	4664.68	intergenic_region	MODIFIER	ENSCAFG00000036802-ENSCAFG00000039597
-	2	60754984	T	C	14724.6	intergenic_region	MODIFIER	ENSCAFG00000036802-ENSCAFG00000039597
-	2	60755262	T	C	3255.53	intergenic_region	MODIFIER	ENSCAFG00000036802-ENSCAFG00000039597
-	2	60755583	A	G	2766.97	intergenic_region	MODIFIER	ENSCAFG00000036802-ENSCAFG00000039597
-	2	60755706	T	G	13957.9	intergenic_region	MODIFIER	ENSCAFG00000036802-ENSCAFG00000039597
-	2	60755895	C	T	2185.72	intergenic_region	MODIFIER	ENSCAFG00000036802-ENSCAFG00000039597
-	2	60756275	A	G	9353.99	intergenic_region	MODIFIER	ENSCAFG00000036802-ENSCAFG00000039597
-	2	60756498	C	T	3149.21	intergenic_region	MODIFIER	ENSCAFG00000036802-ENSCAFG00000039597
-	2	60756889	A	G	12387.4	intergenic_region	MODIFIER	ENSCAFG00000036802-ENSCAFG00000039597
-	2	60757475	A	G	12432.5	intergenic_region	MODIFIER	ENSCAFG00000036802-ENSCAFG00000039597
-	2	60758592	G	A	4237.18	intergenic_region	MODIFIER	ENSCAFG00000036802-ENSCAFG00000039597
-	3	87214168	T	C	6148.78	intergenic_region	MODIFIER	GBA3-5S_rRNA
-	3	87214310	T	A	7910.25	intergenic_region	MODIFIER	GBA3-5S_rRNA
-	3	87214354	C	T	7653.54	intergenic_region	MODIFIER	GBA3-5S_rRNA
-	3	87214453	G	C	5946.89	intergenic_region	MODIFIER	GBA3-5S_rRNA
-	3	87214701	T	G	6155.49	intergenic_region	MODIFIER	GBA3-5S_rRNA
-	3	87214782	A	G	7227.02	intergenic_region	MODIFIER	GBA3-5S_rRNA
-	3	87214788	A	G	6680.13	intergenic_region	MODIFIER	GBA3-5S_rRNA
-	3	87215466	A	G	4426.49	intergenic_region	MODIFIER	GBA3-5S_rRNA
-	3	87215551	G	A	6247.65	intergenic_region	MODIFIER	GBA3-5S_rRNA
-	3	87215567	G	A	8663.66	intergenic_region	MODIFIER	GBA3-5S_rRNA
-	3	87215592	G	A	8920.31	intergenic_region	MODIFIER	GBA3-5S_rRNA
-	3	87215760	C	T	7671.93	intergenic_region	MODIFIER	GBA3-5S_rRNA
-	3	87215765	C	T	7708.91	intergenic_region	MODIFIER	GBA3-5S_rRNA
-	3	87215809	T	C	6570.18	intergenic_region	MODIFIER	GBA3-5S_rRNA
-	3	87215813	A	G	6520.23	intergenic_region	MODIFIER	GBA3-5S_rRNA
-	3	87215841	C	T	5429.66	intergenic_region	MODIFIER	GBA3-5S_rRNA
-	3	87215864	C	T	7075.77	intergenic_region	MODIFIER	GBA3-5S_rRNA
-	3	87215939	T	C	4400.43	intergenic_region	MODIFIER	GBA3-5S_rRNA
-	3	87215963	T	G	5962.69	intergenic_region	MODIFIER	GBA3-5S_rRNA
-	3	87215979	C	T	7100.61	intergenic_region	MODIFIER	GBA3-5S_rRNA
-	3	87215995	G	A	7968.68	intergenic_region	MODIFIER	GBA3-5S_rRNA
-	3	87216000	G	T	8857.06	intergenic_region	MODIFIER	GBA3-5S_rRNA
-	3	87216041	A	G	8483.03	intergenic_region	MODIFIER	GBA3-5S_rRNA
-	3	87216046	C	T	8442.29	intergenic_region	MODIFIER	GBA3-5S_rRNA
-	3	87216192	C	T	8819.14	intergenic_region	MODIFIER	GBA3-5S_rRNA
-	3	87216363	C	T	5913.47	intergenic_region	MODIFIER	GBA3-5S_rRNA
-	3	87216506	C	A	6632.1	intergenic_region	MODIFIER	GBA3-5S_rRNA
-	3	87216537	G	A	5143.95	intergenic_region	MODIFIER	GBA3-5S_rRNA
-	3	87216588	A	C	5236.71	intergenic_region	MODIFIER	GBA3-5S_rRNA
-	3	87216610	G	A	8033.15	intergenic_region	MODIFIER	GBA3-5S_rRNA
-	3	87216620	T	G	7993.57	intergenic_region	MODIFIER	GBA3-5S_rRNA
-	3	87216733	C	T	7662.19	intergenic_region	MODIFIER	GBA3-5S_rRNA
-	3	87216781	C	T	3740.4	intergenic_region	MODIFIER	GBA3-5S_rRNA
-	3	87216851	G	A	7141.25	intergenic_region	MODIFIER	GBA3-5S_rRNA
-	3	87216893	G	A	5259.19	intergenic_region	MODIFIER	GBA3-5S_rRNA
-	3	87216992	T	C	5918.44	intergenic_region	MODIFIER	GBA3-5S_rRNA
-	3	87216998	C	A	8612.04	intergenic_region	MODIFIER	GBA3-5S_rRNA
-	3	87217081	G	A	3850.93	intergenic_region	MODIFIER	GBA3-5S_rRNA
-	3	87217093	G	C	9054.98	intergenic_region	MODIFIER	GBA3-5S_rRNA
-	3	87217103	C	T	3158.92	intergenic_region	MODIFIER	GBA3-5S_rRNA
-	3	87217116	G	A	2717.73	intergenic_region	MODIFIER	GBA3-5S_rRNA
-	3	87217117	C	T	7829.37	intergenic_region	MODIFIER	GBA3-5S_rRNA
-	3	87217119	T	C	2236.16	intergenic_region	MODIFIER	GBA3-5S_rRNA
-	3	87217122	G	A	2194	intergenic_region	MODIFIER	GBA3-5S_rRNA
-	3	87217308	C	T	5521.71	intergenic_region	MODIFIER	GBA3-5S_rRNA
-	3	87217321	G	T	5795.47	intergenic_region	MODIFIER	GBA3-5S_rRNA
-	3	87217354	T	C	5768.32	intergenic_region	MODIFIER	GBA3-5S_rRNA
-	3	87217367	C	A	3099.75	intergenic_region	MODIFIER	GBA3-5S_rRNA
-	3	87217371	A	G	3191.71	intergenic_region	MODIFIER	GBA3-5S_rRNA
-	3	87217374	G	A	6556.89	intergenic_region	MODIFIER	GBA3-5S_rRNA
-	3	87217381	C	T	3200.81	intergenic_region	MODIFIER	GBA3-5S_rRNA
-	3	87217396	C	G	3251.83	intergenic_region	MODIFIER	GBA3-5S_rRNA
-	3	87217422	G	A	6249.45	intergenic_region	MODIFIER	GBA3-5S_rRNA
-	3	87217429	G	A	6198.53	intergenic_region	MODIFIER	GBA3-5S_rRNA
-	3	87217431	T	C	3523.69	intergenic_region	MODIFIER	GBA3-5S_rRNA
-	3	87217441	T	C	3171.75	intergenic_region	MODIFIER	GBA3-5S_rRNA
-	3	87217456	A	G	3035.36	intergenic_region	MODIFIER	GBA3-5S_rRNA
-	3	87217465	G	A	5706.49	intergenic_region	MODIFIER	GBA3-5S_rRNA
-	3	87217640	C	T	3872.24	intergenic_region	MODIFIER	GBA3-5S_rRNA
-	3	87217650	G	A	3723.81	intergenic_region	MODIFIER	GBA3-5S_rRNA
-	3	87217686	G	A	4388.86	intergenic_region	MODIFIER	GBA3-5S_rRNA
-	3	87217689	C	A	4547.83	intergenic_region	MODIFIER	GBA3-5S_rRNA
-	3	87217745	T	C	3608.91	intergenic_region	MODIFIER	GBA3-5S_rRNA
-	3	87217791	G	A	5454.27	intergenic_region	MODIFIER	GBA3-5S_rRNA
-	3	87217936	G	A	5860.72	intergenic_region	MODIFIER	GBA3-5S_rRNA
-	3	87218076	A	G	6705.74	intergenic_region	MODIFIER	GBA3-5S_rRNA
-	3	87218739	G	A	6382.08	intergenic_region	MODIFIER	GBA3-5S_rRNA
-	3	87218930	A	T	8622.71	intergenic_region	MODIFIER	GBA3-5S_rRNA
-	3	87219131	C	T	7837.22	intergenic_region	MODIFIER	GBA3-5S_rRNA
-	3	87219739	C	A	5553.46	intergenic_region	MODIFIER	GBA3-5S_rRNA
-	3	87220161	A	G	7243.62	intergenic_region	MODIFIER	GBA3-5S_rRNA
-	3	87220178	T	C	7645.14	intergenic_region	MODIFIER	GBA3-5S_rRNA
-	3	87220430	C	T	6384.23	intergenic_region	MODIFIER	GBA3-5S_rRNA
-	3	87221060	A	C	7552.27	intergenic_region	MODIFIER	GBA3-5S_rRNA
-	3	87221661	A	G	7276.65	intergenic_region	MODIFIER	GBA3-5S_rRNA
-	3	87221698	C	T	4648.8	intergenic_region	MODIFIER	GBA3-5S_rRNA
-	3	87221880	C	T	6270.73	intergenic_region	MODIFIER	GBA3-5S_rRNA
-	3	87221886	C	T	7309.78	intergenic_region	MODIFIER	GBA3-5S_rRNA
-	3	87221887	G	A	6081.81	intergenic_region	MODIFIER	GBA3-5S_rRNA
-	3	87221890	T	C	5991.88	intergenic_region	MODIFIER	GBA3-5S_rRNA
-	3	87221894	T	C	5719.83	intergenic_region	MODIFIER	GBA3-5S_rRNA
-	3	87221914	C	T	5539.36	intergenic_region	MODIFIER	GBA3-5S_rRNA
-	3	87221915	A	C	5494.71	intergenic_region	MODIFIER	GBA3-5S_rRNA
-	3	87221941	C	T	6843.82	intergenic_region	MODIFIER	GBA3-5S_rRNA
-	3	87222031	G	C	4263.32	intergenic_region	MODIFIER	GBA3-5S_rRNA
-	3	87222092	A	G	4608.47	intergenic_region	MODIFIER	GBA3-5S_rRNA
-	3	87222184	G	C	6946.5	intergenic_region	MODIFIER	GBA3-5S_rRNA
-	3	87222185	C	T	6946.5	intergenic_region	MODIFIER	GBA3-5S_rRNA
-	3	87222222	G	A	5512.51	intergenic_region	MODIFIER	GBA3-5S_rRNA
-	3	87222257	G	A	7543.59	intergenic_region	MODIFIER	GBA3-5S_rRNA
-	3	87222379	C	T	7643.24	intergenic_region	MODIFIER	GBA3-5S_rRNA
-	3	87222532	T	C	1658.44	intergenic_region	MODIFIER	GBA3-5S_rRNA
-	3	87222544	T	C	2973.41	intergenic_region	MODIFIER	GBA3-5S_rRNA
-	3	87222690	C	T	6540.78	intergenic_region	MODIFIER	GBA3-5S_rRNA
-	3	87222699	G	A	7019.38	intergenic_region	MODIFIER	GBA3-5S_rRNA
-	3	87222706	C	T	6467.48	intergenic_region	MODIFIER	GBA3-5S_rRNA
-	3	87222818	T	A	3708.13	intergenic_region	MODIFIER	GBA3-5S_rRNA
-	3	87222844	T	C	650.48	intergenic_region	MODIFIER	GBA3-5S_rRNA
-	3	87222849	T	C	3966.24	intergenic_region	MODIFIER	GBA3-5S_rRNA
-	3	87223389	C	T	8837.78	intergenic_region	MODIFIER	GBA3-5S_rRNA
-	3	87223619	C	T	7703.35	intergenic_region	MODIFIER	GBA3-5S_rRNA
-	3	87223637	G	A	5407.35	intergenic_region	MODIFIER	GBA3-5S_rRNA
-	3	87223895	T	A	8006.81	intergenic_region	MODIFIER	GBA3-5S_rRNA
-	3	87224117	A	T	9684.05	intergenic_region	MODIFIER	GBA3-5S_rRNA
-	3	87224119	G	A	8567.33	intergenic_region	MODIFIER	GBA3-5S_rRNA
-	3	87224415	G	C	7256.58	intergenic_region	MODIFIER	GBA3-5S_rRNA
-	3	87224715	G	A	2652.06	intergenic_region	MODIFIER	GBA3-5S_rRNA
-	3	87224898	T	C	6858.36	intergenic_region	MODIFIER	GBA3-5S_rRNA
-	3	87225174	G	A	5432.61	intergenic_region	MODIFIER	GBA3-5S_rRNA
-	3	87225345	G	A	6860.64	intergenic_region	MODIFIER	GBA3-5S_rRNA
-	3	87225613	G	A	7245.95	intergenic_region	MODIFIER	GBA3-5S_rRNA
-	3	87225629	G	A	7986.28	intergenic_region	MODIFIER	GBA3-5S_rRNA
-	3	87225832	G	A	5992.23	intergenic_region	MODIFIER	GBA3-5S_rRNA
-	3	87225841	C	T	6321.36	intergenic_region	MODIFIER	GBA3-5S_rRNA
-	3	87225999	G	A	7092.99	intergenic_region	MODIFIER	GBA3-5S_rRNA
-	3	87226411	G	A	6301.66	intergenic_region	MODIFIER	GBA3-5S_rRNA
-	3	87226420	G	A	7717.05	intergenic_region	MODIFIER	GBA3-5S_rRNA
-	3	87227409	G	A	5360.32	intergenic_region	MODIFIER	GBA3-5S_rRNA
-	3	87227705	C	T	9121.3	intergenic_region	MODIFIER	GBA3-5S_rRNA
-	3	87227990	C	T	7348.41	intergenic_region	MODIFIER	GBA3-5S_rRNA
-	3	87228124	G	A	6975.89	intergenic_region	MODIFIER	GBA3-5S_rRNA
-	3	87228270	G	A	4945.66	intergenic_region	MODIFIER	GBA3-5S_rRNA
-	3	87230022	C	T	7729.13	intergenic_region	MODIFIER	GBA3-5S_rRNA
-	3	87230181	A	G	6854.11	intergenic_region	MODIFIER	GBA3-5S_rRNA
-	3	87230371	T	C	6725.61	intergenic_region	MODIFIER	GBA3-5S_rRNA
-	3	87230379	T	C	5481.27	intergenic_region	MODIFIER	GBA3-5S_rRNA
-	3	87230381	T	C	6113.48	intergenic_region	MODIFIER	GBA3-5S_rRNA
-	3	87230438	G	A	7734.83	intergenic_region	MODIFIER	GBA3-5S_rRNA
-	3	87230912	T	C	6951.51	intergenic_region	MODIFIER	GBA3-5S_rRNA
-	3	87230947	G	T	6279.41	intergenic_region	MODIFIER	GBA3-5S_rRNA
-	3	87231071	T	C	4684.67	intergenic_region	MODIFIER	GBA3-5S_rRNA
-	3	87231441	C	T	8488.01	intergenic_region	MODIFIER	GBA3-5S_rRNA
-	3	87231693	G	A	6397.6	intergenic_region	MODIFIER	GBA3-5S_rRNA
-	3	87231870	A	G	4308.66	intergenic_region	MODIFIER	GBA3-5S_rRNA
-	3	87233612	G	A	8603.4	intergenic_region	MODIFIER	GBA3-5S_rRNA
-	3	87234220	A	T	6644.88	intergenic_region	MODIFIER	GBA3-5S_rRNA
-	3	87234449	T	C	6776.75	intergenic_region	MODIFIER	GBA3-5S_rRNA
-	3	87234453	G	T	7075.72	intergenic_region	MODIFIER	GBA3-5S_rRNA
-	3	87234457	G	A	6509.41	intergenic_region	MODIFIER	GBA3-5S_rRNA
-	3	87234513	T	C	4906.23	intergenic_region	MODIFIER	GBA3-5S_rRNA
-	3	87234529	A	G	6490.88	intergenic_region	MODIFIER	GBA3-5S_rRNA
-	3	87234682	G	A	4117.78	intergenic_region	MODIFIER	GBA3-5S_rRNA
-	3	87234693	G	A	4164.97	intergenic_region	MODIFIER	GBA3-5S_rRNA
-	3	87234708	C	T	6162.9	intergenic_region	MODIFIER	GBA3-5S_rRNA
-	3	87234837	C	T	5782.49	intergenic_region	MODIFIER	GBA3-5S_rRNA
-	3	87235430	T	C	4408.28	intergenic_region	MODIFIER	GBA3-5S_rRNA
-	3	87235495	G	C	4371.03	intergenic_region	MODIFIER	GBA3-5S_rRNA
-	3	87235521	A	C	5371.12	intergenic_region	MODIFIER	GBA3-5S_rRNA
-	3	87235755	A	G	5099.55	intergenic_region	MODIFIER	GBA3-5S_rRNA
-	3	87235817	T	C	5310.05	intergenic_region	MODIFIER	GBA3-5S_rRNA
-	3	87235942	T	A	6970.32	intergenic_region	MODIFIER	GBA3-5S_rRNA
-	3	87235991	G	A	5437.62	intergenic_region	MODIFIER	GBA3-5S_rRNA
-	3	87236072	G	A	4479.88	intergenic_region	MODIFIER	GBA3-5S_rRNA
-	3	87236292	C	T	4063.02	intergenic_region	MODIFIER	GBA3-5S_rRNA
-	3	87236369	A	G	5148.42	intergenic_region	MODIFIER	GBA3-5S_rRNA
-	3	87236435	T	G	6148.06	intergenic_region	MODIFIER	GBA3-5S_rRNA
-	3	87236436	T	G	6148.38	intergenic_region	MODIFIER	GBA3-5S_rRNA
-	3	87236506	G	T	5092.46	intergenic_region	MODIFIER	GBA3-5S_rRNA
-	3	87237354	G	T	5930.28	intergenic_region	MODIFIER	GBA3-5S_rRNA
-	3	87238039	A	G	7832.65	intergenic_region	MODIFIER	GBA3-5S_rRNA
-	3	87238137	G	T	9219.71	intergenic_region	MODIFIER	GBA3-5S_rRNA
-	3	87238844	A	T	6249.85	intergenic_region	MODIFIER	GBA3-5S_rRNA
-	3	87239197	T	G	6100.9	intergenic_region	MODIFIER	GBA3-5S_rRNA
-	3	87239475	G	C	8329.99	intergenic_region	MODIFIER	GBA3-5S_rRNA
-	3	87239481	C	T	8145.98	intergenic_region	MODIFIER	GBA3-5S_rRNA
-	3	87239924	C	G	7183.85	intergenic_region	MODIFIER	GBA3-5S_rRNA
-	3	87240053	T	C	5044.61	intergenic_region	MODIFIER	GBA3-5S_rRNA
-	3	87240220	A	T	5570.9	intergenic_region	MODIFIER	GBA3-5S_rRNA
-	3	87240260	C	T	6634.86	intergenic_region	MODIFIER	GBA3-5S_rRNA
-	3	87240860	C	T	5732.72	upstream_gene_variant	MODIFIER	5S_rRNA
-	3	87241006	T	C	2942.94	upstream_gene_variant	MODIFIER	5S_rRNA
-	3	87241319	T	C	4589	upstream_gene_variant	MODIFIER	5S_rRNA
-	3	87241614	C	T	11614.5	upstream_gene_variant	MODIFIER	5S_rRNA
-	3	87241865	G	C	5362.33	upstream_gene_variant	MODIFIER	5S_rRNA
-	3	87242202	G	A	5247.93	upstream_gene_variant	MODIFIER	5S_rRNA
-	3	87243357	T	C	7853.93	upstream_gene_variant	MODIFIER	5S_rRNA
-	3	87243463	A	G	4218.27	upstream_gene_variant	MODIFIER	5S_rRNA
-	3	87243536	C	A	6144.24	upstream_gene_variant	MODIFIER	5S_rRNA
-	3	87243716	C	G	8088.76	upstream_gene_variant	MODIFIER	5S_rRNA
-	3	87243721	C	T	8103.9	upstream_gene_variant	MODIFIER	5S_rRNA
-	3	87243768	G	A	6608.21	upstream_gene_variant	MODIFIER	5S_rRNA
-	3	87243800	C	A	7669.55	upstream_gene_variant	MODIFIER	5S_rRNA
-	3	87243801	A	G	7669.42	upstream_gene_variant	MODIFIER	5S_rRNA
-	3	87243900	C	G	6255.21	upstream_gene_variant	MODIFIER	5S_rRNA
-	3	87243915	C	T	5028.43	upstream_gene_variant	MODIFIER	5S_rRNA
-	3	87244046	G	A	5003.88	upstream_gene_variant	MODIFIER	5S_rRNA
-	3	87244221	C	A	2207.06	upstream_gene_variant	MODIFIER	5S_rRNA
-	3	87244477	G	A	5823.08	upstream_gene_variant	MODIFIER	5S_rRNA
-	3	87244737	G	A	5347.07	upstream_gene_variant	MODIFIER	5S_rRNA
-	3	87244800	A	G	5390.14	upstream_gene_variant	MODIFIER	5S_rRNA
-	3	87244914	C	T	4384.44	upstream_gene_variant	MODIFIER	5S_rRNA
-	3	87245018	A	G	3866.36	upstream_gene_variant	MODIFIER	5S_rRNA
-	3	87245022	G	A	4913.1	upstream_gene_variant	MODIFIER	5S_rRNA
-	3	87245034	G	A	6243.01	upstream_gene_variant	MODIFIER	5S_rRNA
-	3	87245272	G	A	6395.74	upstream_gene_variant	MODIFIER	5S_rRNA
-	3	87246311	T	C	4331.86	downstream_gene_variant	MODIFIER	5S_rRNA
-	3	87246315	T	C	3980.31	downstream_gene_variant	MODIFIER	5S_rRNA
-	3	87246320	G	A	3828.26	downstream_gene_variant	MODIFIER	5S_rRNA
-	3	87246458	C	T	6866.27	downstream_gene_variant	MODIFIER	5S_rRNA
-	3	87246608	C	T	7839.06	downstream_gene_variant	MODIFIER	5S_rRNA
-	3	87246631	C	T	5472.29	downstream_gene_variant	MODIFIER	5S_rRNA
-	3	87246691	G	A	6226.17	downstream_gene_variant	MODIFIER	5S_rRNA
-	3	87247234	A	G	6452.71	downstream_gene_variant	MODIFIER	5S_rRNA
-	3	87247288	C	T	7419.73	downstream_gene_variant	MODIFIER	5S_rRNA
-	3	87247589	G	A	6086.78	downstream_gene_variant	MODIFIER	5S_rRNA
-	3	87247829	T	A	9195.69	downstream_gene_variant	MODIFIER	5S_rRNA
-	3	87247839	T	C	9438.65	downstream_gene_variant	MODIFIER	5S_rRNA
-	3	87248005	T	A	5767.1	downstream_gene_variant	MODIFIER	5S_rRNA
-	3	87248006	C	T	5800.04	downstream_gene_variant	MODIFIER	5S_rRNA
-	3	87248082	G	A	7233.23	downstream_gene_variant	MODIFIER	5S_rRNA
-	3	87248090	T	A	7378.33	downstream_gene_variant	MODIFIER	5S_rRNA
-	3	87248154	A	G	6330.98	downstream_gene_variant	MODIFIER	5S_rRNA
-	3	87248168	T	C	5314.19	downstream_gene_variant	MODIFIER	5S_rRNA
-	3	87248385	A	G	7297.79	downstream_gene_variant	MODIFIER	5S_rRNA
-	3	87248463	C	T	7780.26	downstream_gene_variant	MODIFIER	5S_rRNA
-	3	87248570	A	G	5792.17	downstream_gene_variant	MODIFIER	5S_rRNA
-	3	87248738	G	C	3122.04	downstream_gene_variant	MODIFIER	5S_rRNA
-	3	87248783	A	G	4679.51	downstream_gene_variant	MODIFIER	5S_rRNA
-	3	87248790	C	T	7711.13	downstream_gene_variant	MODIFIER	5S_rRNA
-	3	87248801	G	A	7985.3	downstream_gene_variant	MODIFIER	5S_rRNA
-	3	87248825	G	A	7398.68	downstream_gene_variant	MODIFIER	5S_rRNA
-	3	87248914	C	T	8517.66	downstream_gene_variant	MODIFIER	5S_rRNA
-	3	87248994	A	G	5296.39	downstream_gene_variant	MODIFIER	5S_rRNA
-	3	87248996	T	C	4595.92	downstream_gene_variant	MODIFIER	5S_rRNA
-	3	87249082	A	T	5225.29	downstream_gene_variant	MODIFIER	5S_rRNA
-	3	87249085	G	A	5257.87	downstream_gene_variant	MODIFIER	5S_rRNA
-	3	87249092	G	A	5974.14	downstream_gene_variant	MODIFIER	5S_rRNA
-	3	87249132	G	A	4988.85	downstream_gene_variant	MODIFIER	5S_rRNA
-	3	87249134	T	C	5122.95	downstream_gene_variant	MODIFIER	5S_rRNA
-	3	87249165	G	A	5350.85	downstream_gene_variant	MODIFIER	5S_rRNA
-	3	87249190	A	G	3485.89	downstream_gene_variant	MODIFIER	5S_rRNA
-	3	87249326	C	T	5841.52	downstream_gene_variant	MODIFIER	5S_rRNA
-	3	87249679	C	T	4766.48	downstream_gene_variant	MODIFIER	5S_rRNA
-	3	87249681	C	T	4675.82	downstream_gene_variant	MODIFIER	5S_rRNA
-	3	87249860	T	C	6468.14	downstream_gene_variant	MODIFIER	5S_rRNA
-	3	87249906	T	G	6641.84	downstream_gene_variant	MODIFIER	5S_rRNA
-	3	87251429	A	G	5668.8	intergenic_region	MODIFIER	5S_rRNA-ADGRA3
-	3	87251564	G	A	5682.38	intergenic_region	MODIFIER	5S_rRNA-ADGRA3
-	3	87251576	C	T	7631.35	intergenic_region	MODIFIER	5S_rRNA-ADGRA3
-	3	87251680	G	A	4711.87	intergenic_region	MODIFIER	5S_rRNA-ADGRA3
-	3	87251689	A	C	8730.05	intergenic_region	MODIFIER	5S_rRNA-ADGRA3
-	3	87252074	C	T	5944.87	intergenic_region	MODIFIER	5S_rRNA-ADGRA3
-	3	87252321	A	T	4972.21	intergenic_region	MODIFIER	5S_rRNA-ADGRA3
-	3	87252373	C	T	8697.36	intergenic_region	MODIFIER	5S_rRNA-ADGRA3
-	3	87252478	A	G	5326.69	intergenic_region	MODIFIER	5S_rRNA-ADGRA3
-	3	87252628	A	C	9254.8	intergenic_region	MODIFIER	5S_rRNA-ADGRA3
-	3	87252990	G	A	7727.84	intergenic_region	MODIFIER	5S_rRNA-ADGRA3
-	3	87253145	G	C	5649.01	intergenic_region	MODIFIER	5S_rRNA-ADGRA3
-	3	87253211	A	G	1921.21	intergenic_region	MODIFIER	5S_rRNA-ADGRA3
-	3	87253404	A	G	4945.51	intergenic_region	MODIFIER	5S_rRNA-ADGRA3
-	3	87253810	T	C	9159.4	intergenic_region	MODIFIER	5S_rRNA-ADGRA3
-	3	87253922	C	T	8128.8	intergenic_region	MODIFIER	5S_rRNA-ADGRA3
-	3	87253988	C	A	8391.86	intergenic_region	MODIFIER	5S_rRNA-ADGRA3
-	3	87253999	A	G	3404.95	intergenic_region	MODIFIER	5S_rRNA-ADGRA3
-	3	87254240	A	G	4308.17	intergenic_region	MODIFIER	5S_rRNA-ADGRA3
-	3	87254387	T	G	4712.08	intergenic_region	MODIFIER	5S_rRNA-ADGRA3
-	3	87254521	G	C	6260.87	intergenic_region	MODIFIER	5S_rRNA-ADGRA3
-	3	87254611	A	T	8092.78	intergenic_region	MODIFIER	5S_rRNA-ADGRA3
-	3	87254651	G	A	7543.05	intergenic_region	MODIFIER	5S_rRNA-ADGRA3
-	3	87254691	G	T	6154.63	intergenic_region	MODIFIER	5S_rRNA-ADGRA3
-	3	87254840	G	A	4921.17	intergenic_region	MODIFIER	5S_rRNA-ADGRA3
-	3	87254885	T	C	5119.05	intergenic_region	MODIFIER	5S_rRNA-ADGRA3
-	3	87255270	C	T	6213.55	intergenic_region	MODIFIER	5S_rRNA-ADGRA3
-	3	87255287	G	A	5645.72	intergenic_region	MODIFIER	5S_rRNA-ADGRA3
-	3	87255372	T	G	8877.07	intergenic_region	MODIFIER	5S_rRNA-ADGRA3
-	3	87255398	A	G	7082.56	intergenic_region	MODIFIER	5S_rRNA-ADGRA3
-	3	87255409	C	T	7174.18	intergenic_region	MODIFIER	5S_rRNA-ADGRA3
-	3	87255477	G	C	7371.68	intergenic_region	MODIFIER	5S_rRNA-ADGRA3
-	3	87255483	T	A	9197.42	intergenic_region	MODIFIER	5S_rRNA-ADGRA3
-	3	87255489	A	G	9686.31	intergenic_region	MODIFIER	5S_rRNA-ADGRA3
-	3	87255540	G	A	7732.96	intergenic_region	MODIFIER	5S_rRNA-ADGRA3
-	3	87255736	G	A	6980.4	intergenic_region	MODIFIER	5S_rRNA-ADGRA3
-	3	87255797	C	T	6628.29	intergenic_region	MODIFIER	5S_rRNA-ADGRA3
-	3	87255853	G	A	8062.39	intergenic_region	MODIFIER	5S_rRNA-ADGRA3
-	3	87255857	C	T	8080.37	intergenic_region	MODIFIER	5S_rRNA-ADGRA3
-	3	87256158	C	T	5784.57	intergenic_region	MODIFIER	5S_rRNA-ADGRA3
-	3	87256523	C	T	5462.67	intergenic_region	MODIFIER	5S_rRNA-ADGRA3
-	3	87256577	C	T	3019.08	intergenic_region	MODIFIER	5S_rRNA-ADGRA3
-	3	87256922	A	T	4724.84	intergenic_region	MODIFIER	5S_rRNA-ADGRA3
-	3	87257025	C	T	8693.99	intergenic_region	MODIFIER	5S_rRNA-ADGRA3
-	3	87257026	G	A	6832.14	intergenic_region	MODIFIER	5S_rRNA-ADGRA3
-	3	87257034	G	A	6967.67	intergenic_region	MODIFIER	5S_rRNA-ADGRA3
-	3	87257105	T	A	7819.27	intergenic_region	MODIFIER	5S_rRNA-ADGRA3
-	3	87257155	G	A	6352.4	intergenic_region	MODIFIER	5S_rRNA-ADGRA3
-	3	87257208	T	C	4728.1	intergenic_region	MODIFIER	5S_rRNA-ADGRA3
-	3	87257232	C	T	6871.65	intergenic_region	MODIFIER	5S_rRNA-ADGRA3
-	3	87257299	G	A	5450.24	intergenic_region	MODIFIER	5S_rRNA-ADGRA3
-	3	87257383	T	C	5569.94	intergenic_region	MODIFIER	5S_rRNA-ADGRA3
-	3	87257800	G	A	6011.63	intergenic_region	MODIFIER	5S_rRNA-ADGRA3
-	3	87257892	C	A	5858.89	intergenic_region	MODIFIER	5S_rRNA-ADGRA3
-	3	87258070	G	A	5740.32	intergenic_region	MODIFIER	5S_rRNA-ADGRA3
-	3	87258146	C	T	7206.77	intergenic_region	MODIFIER	5S_rRNA-ADGRA3
-	3	87258153	G	A	6776.8	intergenic_region	MODIFIER	5S_rRNA-ADGRA3
-	3	87258423	C	T	5696.51	intergenic_region	MODIFIER	5S_rRNA-ADGRA3
-	3	87258542	A	G	8712.94	intergenic_region	MODIFIER	5S_rRNA-ADGRA3
-	3	87258552	G	A	8641.01	intergenic_region	MODIFIER	5S_rRNA-ADGRA3
-	3	87258628	G	A	6139.92	intergenic_region	MODIFIER	5S_rRNA-ADGRA3
-	3	87258644	G	A	6007.46	intergenic_region	MODIFIER	5S_rRNA-ADGRA3
-	3	87258648	G	T	2200.95	intergenic_region	MODIFIER	5S_rRNA-ADGRA3
-	3	87258863	T	G	7102.42	intergenic_region	MODIFIER	5S_rRNA-ADGRA3
-	3	87258891	G	A	5438.14	intergenic_region	MODIFIER	5S_rRNA-ADGRA3
-	3	87259120	A	T	7835.34	intergenic_region	MODIFIER	5S_rRNA-ADGRA3
-	3	87259369	A	G	5918.64	intergenic_region	MODIFIER	5S_rRNA-ADGRA3
-	3	87259496	T	C	5402.25	intergenic_region	MODIFIER	5S_rRNA-ADGRA3
-	3	87260128	A	C	6077.61	intergenic_region	MODIFIER	5S_rRNA-ADGRA3
-	3	87260426	G	A	5694.42	intergenic_region	MODIFIER	5S_rRNA-ADGRA3
-	3	87260907	T	C	5204.31	intergenic_region	MODIFIER	5S_rRNA-ADGRA3
-	3	87261353	A	G	5154.1	intergenic_region	MODIFIER	5S_rRNA-ADGRA3
-	3	87261439	C	T	5392.75	intergenic_region	MODIFIER	5S_rRNA-ADGRA3
-	3	87261481	G	C	5827.35	intergenic_region	MODIFIER	5S_rRNA-ADGRA3
-	3	87261576	C	G	5385.47	intergenic_region	MODIFIER	5S_rRNA-ADGRA3
-	3	87261668	A	T	5075.21	intergenic_region	MODIFIER	5S_rRNA-ADGRA3
-	3	87261675	A	T	6070.8	intergenic_region	MODIFIER	5S_rRNA-ADGRA3
-	3	87261703	A	C	6184.96	intergenic_region	MODIFIER	5S_rRNA-ADGRA3
-	3	87261742	A	G	6853.98	intergenic_region	MODIFIER	5S_rRNA-ADGRA3
-	3	87261751	G	A	6970.95	intergenic_region	MODIFIER	5S_rRNA-ADGRA3
-	3	87261878	C	A	8151.26	intergenic_region	MODIFIER	5S_rRNA-ADGRA3
-	3	87261882	A	G	7900.32	intergenic_region	MODIFIER	5S_rRNA-ADGRA3
-	3	87261919	A	T	5162.31	intergenic_region	MODIFIER	5S_rRNA-ADGRA3
-	3	87261978	C	T	4988.85	intergenic_region	MODIFIER	5S_rRNA-ADGRA3
-	3	87262019	A	G	7575.2	intergenic_region	MODIFIER	5S_rRNA-ADGRA3
-	3	87262031	G	A	7588.12	intergenic_region	MODIFIER	5S_rRNA-ADGRA3
-	3	87262033	G	A	7394.08	intergenic_region	MODIFIER	5S_rRNA-ADGRA3
-	3	87262038	C	G	7670.79	intergenic_region	MODIFIER	5S_rRNA-ADGRA3
-	3	87262063	G	T	9540.93	intergenic_region	MODIFIER	5S_rRNA-ADGRA3
-	3	87262109	T	C	5731.74	intergenic_region	MODIFIER	5S_rRNA-ADGRA3
-	3	87262151	G	A	7169.2	intergenic_region	MODIFIER	5S_rRNA-ADGRA3
-	3	87262241	C	G	5341.4	intergenic_region	MODIFIER	5S_rRNA-ADGRA3
-	3	87262269	T	C	3841.58	intergenic_region	MODIFIER	5S_rRNA-ADGRA3
-	3	87262298	T	C	20.12	intergenic_region	MODIFIER	5S_rRNA-ADGRA3
-	3	87262413	C	T	4525.15	intergenic_region	MODIFIER	5S_rRNA-ADGRA3
-	3	87262453	G	C	6257.7	intergenic_region	MODIFIER	5S_rRNA-ADGRA3
-	3	87262458	C	T	7759.76	intergenic_region	MODIFIER	5S_rRNA-ADGRA3
-	3	87262476	C	T	7550.71	intergenic_region	MODIFIER	5S_rRNA-ADGRA3
-	3	87262513	T	C	5497.71	intergenic_region	MODIFIER	5S_rRNA-ADGRA3
-	3	87262517	G	T	5899.82	intergenic_region	MODIFIER	5S_rRNA-ADGRA3
-	3	87262524	T	C	5712.09	intergenic_region	MODIFIER	5S_rRNA-ADGRA3
-	3	87262543	T	C	8090.93	intergenic_region	MODIFIER	5S_rRNA-ADGRA3
-	3	87262564	A	G	8210.64	intergenic_region	MODIFIER	5S_rRNA-ADGRA3
-	3	87262594	C	T	5231.25	intergenic_region	MODIFIER	5S_rRNA-ADGRA3
-	3	87262647	T	A	6217.91	intergenic_region	MODIFIER	5S_rRNA-ADGRA3
-	3	87262649	G	T	4195.75	intergenic_region	MODIFIER	5S_rRNA-ADGRA3
-	3	87262708	C	T	9214.41	intergenic_region	MODIFIER	5S_rRNA-ADGRA3
-	3	87262710	T	C	9337.76	intergenic_region	MODIFIER	5S_rRNA-ADGRA3
-	3	87262723	T	C	9365.65	intergenic_region	MODIFIER	5S_rRNA-ADGRA3
-	3	87262769	C	T	4960.04	intergenic_region	MODIFIER	5S_rRNA-ADGRA3
-	3	87262791	T	C	6538.34	intergenic_region	MODIFIER	5S_rRNA-ADGRA3
-	3	87262842	C	T	5129.5	intergenic_region	MODIFIER	5S_rRNA-ADGRA3
-	3	87262890	T	C	8379.15	intergenic_region	MODIFIER	5S_rRNA-ADGRA3
-	3	87262899	A	G	9444.1	intergenic_region	MODIFIER	5S_rRNA-ADGRA3
-	3	87262957	T	A	8551.92	intergenic_region	MODIFIER	5S_rRNA-ADGRA3
-	3	87262958	C	A	8551.92	intergenic_region	MODIFIER	5S_rRNA-ADGRA3
-	3	87262970	A	G	6325.17	intergenic_region	MODIFIER	5S_rRNA-ADGRA3
-	3	87263276	G	A	9809.05	intergenic_region	MODIFIER	5S_rRNA-ADGRA3
-	3	87263301	T	C	9791.07	intergenic_region	MODIFIER	5S_rRNA-ADGRA3
-	3	87263314	G	T	8492.11	intergenic_region	MODIFIER	5S_rRNA-ADGRA3
-	3	87263319	A	C	8537.01	intergenic_region	MODIFIER	5S_rRNA-ADGRA3
-	3	87263370	C	T	5458.81	intergenic_region	MODIFIER	5S_rRNA-ADGRA3
-	3	87263399	C	T	5611.39	intergenic_region	MODIFIER	5S_rRNA-ADGRA3
-	3	87263528	C	T	6701.04	intergenic_region	MODIFIER	5S_rRNA-ADGRA3
-	3	87263565	A	G	6983.47	intergenic_region	MODIFIER	5S_rRNA-ADGRA3
-	3	87263597	A	T	6954.73	intergenic_region	MODIFIER	5S_rRNA-ADGRA3
-	3	87263840	T	C	8214.84	intergenic_region	MODIFIER	5S_rRNA-ADGRA3
-	3	87263890	G	T	5626.47	intergenic_region	MODIFIER	5S_rRNA-ADGRA3
-	3	87263949	C	T	7255.62	intergenic_region	MODIFIER	5S_rRNA-ADGRA3
-	3	87263980	C	T	7626.74	intergenic_region	MODIFIER	5S_rRNA-ADGRA3
-	3	87264052	A	C	8030.31	intergenic_region	MODIFIER	5S_rRNA-ADGRA3
-	3	87264101	A	G	6532.44	intergenic_region	MODIFIER	5S_rRNA-ADGRA3
-	3	87264703	C	T	7819.06	intergenic_region	MODIFIER	5S_rRNA-ADGRA3
-	4	6695554	C	T	10121.6	intron_variant	MODIFIER	PCNX2
-	4	6696779	A	T	2058.06	intron_variant	MODIFIER	PCNX2
-	4	6697804	G	A	5939.15	synonymous_variant	LOW	PCNX2
-	4	6698144	C	G	4581.72	intron_variant	MODIFIER	PCNX2
-	4	6698529	T	G	6214.06	intron_variant	MODIFIER	PCNX2
-	4	6699770	C	T	7920.86	downstream_gene_variant	MODIFIER	PCNX2
-	4	6699923	T	C	4147.48	downstream_gene_variant	MODIFIER	PCNX2
-	4	6700252	A	T	5023.05	downstream_gene_variant	MODIFIER	PCNX2
-	4	6701172	C	T	6213.65	downstream_gene_variant	MODIFIER	PCNX2
-	4	6701201	C	T	7003.11	downstream_gene_variant	MODIFIER	PCNX2
-	4	6701252	C	T	6295.56	downstream_gene_variant	MODIFIER	PCNX2
-	4	6702428	A	G	3911.01	downstream_gene_variant	MODIFIER	PCNX2
-	4	6702595	C	G	9620.71	downstream_gene_variant	MODIFIER	PCNX2
-	4	6702803	C	T	11164.5	downstream_gene_variant	MODIFIER	PCNX2
-	4	6702860	G	A	4367.79	downstream_gene_variant	MODIFIER	PCNX2
-	4	6702895	C	G	6090.17	downstream_gene_variant	MODIFIER	PCNX2
-	4	6702919	C	T	7891.53	downstream_gene_variant	MODIFIER	PCNX2
-	4	6702938	G	C	7488.73	downstream_gene_variant	MODIFIER	PCNX2
-	4	6702986	C	T	3741.63	downstream_gene_variant	MODIFIER	PCNX2
-	4	6703029	G	T	11226.5	downstream_gene_variant	MODIFIER	PCNX2
-	4	6703196	G	A	5633.55	downstream_gene_variant	MODIFIER	PCNX2
-	4	6703197	G	T	5633.6	downstream_gene_variant	MODIFIER	PCNX2
-	4	6703208	G	A	3824.77	downstream_gene_variant	MODIFIER	PCNX2
-	4	6703307	C	T	10424.9	downstream_gene_variant	MODIFIER	PCNX2
-	4	6703495	T	G	9805.98	downstream_gene_variant	MODIFIER	PCNX2
-	4	6703506	T	C	5331.94	downstream_gene_variant	MODIFIER	PCNX2
-	4	6703510	G	A	5627.35	downstream_gene_variant	MODIFIER	PCNX2
-	4	6703911	G	T	4157.69	downstream_gene_variant	MODIFIER	PCNX2
-	4	6704220	C	A	8294.47	downstream_gene_variant	MODIFIER	PCNX2
-	4	6704679	G	A	5941.1	downstream_gene_variant	MODIFIER	ENSCAFG00000011612
-	4	6704921	C	T	4119.46	downstream_gene_variant	MODIFIER	ENSCAFG00000011612
-	4	6705047	A	G	3713.2	missense_variant	MODERATE	ENSCAFG00000011612
-	4	6705370	G	A	8542.04	intron_variant	MODIFIER	ENSCAFG00000011612
-	4	6705511	G	A	10863.9	intron_variant	MODIFIER	ENSCAFG00000011612
-	4	6706306	T	C	3184.13	intron_variant	MODIFIER	ENSCAFG00000011612
-	4	6707131	G	A	5703.28	intron_variant	MODIFIER	ENSCAFG00000011612
-	4	6707153	G	A	2483.62	intron_variant	MODIFIER	ENSCAFG00000011612
-	4	6708033	C	A	3019.83	intron_variant	MODIFIER	ENSCAFG00000011612
-	4	6708097	G	A	5818.37	intron_variant	MODIFIER	ENSCAFG00000011612
-	4	6708645	A	G	2963.54	intron_variant	MODIFIER	ENSCAFG00000011612
-	4	6708851	C	T	9513.71	intron_variant	MODIFIER	ENSCAFG00000011612
-	4	6709453	C	T	8216.49	intron_variant	MODIFIER	ENSCAFG00000011612
-	4	6710404	T	C	12433.6	intron_variant	MODIFIER	ENSCAFG00000011612
-	4	6711016	T	C	12787.2	intron_variant	MODIFIER	ENSCAFG00000011612
-	4	6711726	C	T	4882.47	intron_variant	MODIFIER	ENSCAFG00000011612
-	4	6711749	C	T	3901.44	intron_variant	MODIFIER	ENSCAFG00000011612
-	4	6711889	G	A	5657.51	intron_variant	MODIFIER	ENSCAFG00000011612
-	4	6712135	C	T	4687.43	intron_variant	MODIFIER	ENSCAFG00000011612
-	4	6712640	G	A	9930.28	intron_variant	MODIFIER	ENSCAFG00000011612
-	4	6713595	G	A	3996.73	intron_variant	MODIFIER	ENSCAFG00000011612
-	4	6713822	G	A	3837.02	intron_variant	MODIFIER	ENSCAFG00000011612
-	4	6714642	T	C	9628.28	intron_variant	MODIFIER	ENSCAFG00000011612
-	4	6714746	C	T	639.86	intron_variant	MODIFIER	ENSCAFG00000011612
-	4	6715277	G	A	5827.11	intron_variant	MODIFIER	ENSCAFG00000011612
-	4	6715380	A	G	7930.39	intron_variant	MODIFIER	ENSCAFG00000011612
-	4	6715745	G	A	4193.15	intron_variant	MODIFIER	ENSCAFG00000011612
-	4	6716102	G	A	13691.4	intron_variant	MODIFIER	ENSCAFG00000011612
-	4	6716586	T	C	5571.32	intron_variant	MODIFIER	ENSCAFG00000011612
-	4	6716746	C	T	5466.64	intron_variant	MODIFIER	ENSCAFG00000011612
-	4	6717534	C	T	8054.22	intron_variant	MODIFIER	ENSCAFG00000011612
-	4	6717809	C	T	8715.22	intron_variant	MODIFIER	ENSCAFG00000011612
-	4	6718050	G	T	7752.2	intron_variant	MODIFIER	ENSCAFG00000011612
-	4	6718274	A	T	3794	intron_variant	MODIFIER	ENSCAFG00000011612
-	4	6719372	C	T	7508.42	intron_variant	MODIFIER	ENSCAFG00000011612
-	4	6719554	C	T	3811.77	intron_variant	MODIFIER	ENSCAFG00000011612
-	4	6719972	G	A	3608.64	intron_variant	MODIFIER	ENSCAFG00000011612
-	4	6720121	T	C	6390.25	intron_variant	MODIFIER	ENSCAFG00000011612
-	4	6720264	A	C	8357.08	intron_variant	MODIFIER	ENSCAFG00000011612
-	4	6720616	A	G	3549.92	intron_variant	MODIFIER	ENSCAFG00000011612
-	4	6721227	A	G	2558.58	intron_variant	MODIFIER	ENSCAFG00000011612
-	4	6721291	C	T	11642.6	intron_variant	MODIFIER	ENSCAFG00000011612
-	4	6722126	G	C	6341.57	intron_variant	MODIFIER	ENSCAFG00000011612
-	4	6722226	C	A	11314.9	intron_variant	MODIFIER	ENSCAFG00000011612
-	4	6722257	G	A	7779	intron_variant	MODIFIER	ENSCAFG00000011612
-	4	6722668	A	T	4831.62	intron_variant	MODIFIER	ENSCAFG00000011612
-	4	6723320	T	C	11662.5	intron_variant	MODIFIER	ENSCAFG00000011612
-	4	6723372	T	C	10751	intron_variant	MODIFIER	ENSCAFG00000011612
-	4	6723529	A	G	5508.56	intron_variant	MODIFIER	ENSCAFG00000011612
-	4	6723535	A	T	5384.32	intron_variant	MODIFIER	ENSCAFG00000011612
-	4	6723688	T	C	5522.98	intron_variant	MODIFIER	ENSCAFG00000011612
-	4	6723697	G	T	11458.4	intron_variant	MODIFIER	ENSCAFG00000011612
-	4	6723703	T	C	11547.9	intron_variant	MODIFIER	ENSCAFG00000011612
-	4	6724251	G	A	8504.2	intron_variant	MODIFIER	ENSCAFG00000011612
-	4	6724346	G	C	7176.28	intron_variant	MODIFIER	ENSCAFG00000011612
-	4	6724513	C	A	4217.76	intron_variant	MODIFIER	ENSCAFG00000011612
-	4	6724613	T	G	3157.48	intron_variant	MODIFIER	ENSCAFG00000011612
-	4	6724803	C	A	4946.27	intron_variant	MODIFIER	ENSCAFG00000011612
-	4	6724808	G	A	5036.65	intron_variant	MODIFIER	ENSCAFG00000011612
-	4	6724829	C	T	4534.84	intron_variant	MODIFIER	ENSCAFG00000011612
-	4	6725019	G	A	1575.62	intron_variant	MODIFIER	ENSCAFG00000011612
-	4	6725414	G	C	103.04	intron_variant	MODIFIER	ENSCAFG00000011612
-	4	6725799	C	T	8038.38	intron_variant	MODIFIER	ENSCAFG00000011612
-	4	6726422	G	A	4735.36	intron_variant	MODIFIER	ENSCAFG00000011612
-	4	6726468	T	C	8466.61	intron_variant	MODIFIER	ENSCAFG00000011612
-	4	6727956	C	T	3788.25	intron_variant	MODIFIER	ENSCAFG00000011612
-	4	6728807	G	A	9391.13	intron_variant	MODIFIER	ENSCAFG00000011612
-	4	6730841	G	A	8977.63	intron_variant	MODIFIER	ENSCAFG00000011612
-	4	6733974	C	A	269.15	5_prime_UTR_premature_start_codon_gain_variant	LOW	ENSCAFG00000011612
TFBS	4	6734009	T	C	6831.23	5_prime_UTR_variant	MODIFIER	ENSCAFG00000011612
-	4	6734174	A	G	8839.3	5_prime_UTR_variant	MODIFIER	ENSCAFG00000011612
TFBS	4	6734488	C	T	10349.3	upstream_gene_variant	MODIFIER	ENSCAFG00000011612
-	4	6734904	A	G	3032.45	upstream_gene_variant	MODIFIER	ENSCAFG00000011612
-	4	6735077	G	A	10732	upstream_gene_variant	MODIFIER	ENSCAFG00000011612
-	4	6735161	C	T	2566.2	upstream_gene_variant	MODIFIER	ENSCAFG00000011612
-	4	6735392	T	C	632.9	upstream_gene_variant	MODIFIER	ENSCAFG00000011612
-	4	6735434	A	G	2409.11	upstream_gene_variant	MODIFIER	ENSCAFG00000011612
-	4	6735917	G	T	6025.06	upstream_gene_variant	MODIFIER	ENSCAFG00000011612
-	4	6736059	G	A	2272.11	upstream_gene_variant	MODIFIER	ENSCAFG00000011612
-	4	6736141	C	T	2919.02	upstream_gene_variant	MODIFIER	ENSCAFG00000011612
-	4	6736303	G	A	9216.84	upstream_gene_variant	MODIFIER	ENSCAFG00000011612
-	4	6736570	A	G	15450.1	upstream_gene_variant	MODIFIER	ENSCAFG00000011612
-	4	6736730	C	T	12728.3	upstream_gene_variant	MODIFIER	ENSCAFG00000011612
-	4	6736784	A	G	2553.1	upstream_gene_variant	MODIFIER	ENSCAFG00000011612
-	4	6736820	G	A	3117.97	upstream_gene_variant	MODIFIER	ENSCAFG00000011612
-	4	6736822	A	G	7381.41	upstream_gene_variant	MODIFIER	ENSCAFG00000011612
-	4	6736854	C	T	802.86	upstream_gene_variant	MODIFIER	ENSCAFG00000011612
-	4	6736969	G	A	861.97	upstream_gene_variant	MODIFIER	ENSCAFG00000011612
-	4	6737087	G	C	2755.88	upstream_gene_variant	MODIFIER	ENSCAFG00000011612
-	4	6738194	G	A	1670.03	upstream_gene_variant	MODIFIER	ENSCAFG00000011612
-	4	6738245	C	T	791.88	upstream_gene_variant	MODIFIER	ENSCAFG00000011612
-	4	6738455	G	A	9221.21	upstream_gene_variant	MODIFIER	ENSCAFG00000011612
-	4	6738553	C	T	3751.11	upstream_gene_variant	MODIFIER	ENSCAFG00000011612
-	4	6738884	G	A	2768.45	upstream_gene_variant	MODIFIER	ENSCAFG00000011612
-	4	6738887	C	T	8904.31	upstream_gene_variant	MODIFIER	ENSCAFG00000011612
-	4	6738956	C	T	13897.4	upstream_gene_variant	MODIFIER	ENSCAFG00000011612
-	4	6739014	C	T	10814.1	upstream_gene_variant	MODIFIER	ENSCAFG00000011612
-	4	6739258	G	C	10672.4	intergenic_region	MODIFIER	ENSCAFG00000011612-5S_rRNA
-	4	6739319	G	A	1076.23	intergenic_region	MODIFIER	ENSCAFG00000011612-5S_rRNA
-	4	6739487	G	A	2356.58	intergenic_region	MODIFIER	ENSCAFG00000011612-5S_rRNA
-	4	6739670	G	A	9987.63	intergenic_region	MODIFIER	ENSCAFG00000011612-5S_rRNA
-	4	6740041	A	G	9334	intergenic_region	MODIFIER	ENSCAFG00000011612-5S_rRNA
-	4	6740218	G	A	2628.47	intergenic_region	MODIFIER	ENSCAFG00000011612-5S_rRNA
-	4	6740266	A	G	3600.64	intergenic_region	MODIFIER	ENSCAFG00000011612-5S_rRNA
-	4	6740387	A	G	10851	intergenic_region	MODIFIER	ENSCAFG00000011612-5S_rRNA
-	4	6740427	G	A	10485.1	intergenic_region	MODIFIER	ENSCAFG00000011612-5S_rRNA
-	4	6740528	A	G	10751.3	intergenic_region	MODIFIER	ENSCAFG00000011612-5S_rRNA
-	4	6740583	T	C	10137.4	intergenic_region	MODIFIER	ENSCAFG00000011612-5S_rRNA
-	4	6740635	G	A	11295.3	intergenic_region	MODIFIER	ENSCAFG00000011612-5S_rRNA
-	4	6740674	C	T	10678.2	intergenic_region	MODIFIER	ENSCAFG00000011612-5S_rRNA
-	4	6740695	G	A	10651.4	intergenic_region	MODIFIER	ENSCAFG00000011612-5S_rRNA
-	4	6740779	A	G	9818.91	intergenic_region	MODIFIER	ENSCAFG00000011612-5S_rRNA
-	4	6740885	C	T	10078.2	intergenic_region	MODIFIER	ENSCAFG00000011612-5S_rRNA
-	4	6740888	C	A	2869.02	intergenic_region	MODIFIER	ENSCAFG00000011612-5S_rRNA
-	4	6740921	T	A	3884.7	intergenic_region	MODIFIER	ENSCAFG00000011612-5S_rRNA
-	4	6741004	C	T	10085.1	intergenic_region	MODIFIER	ENSCAFG00000011612-5S_rRNA
-	4	6741005	A	G	1557.7	intergenic_region	MODIFIER	ENSCAFG00000011612-5S_rRNA
-	4	6741029	T	G	1416.82	intergenic_region	MODIFIER	ENSCAFG00000011612-5S_rRNA
-	4	6741033	G	A	11747	intergenic_region	MODIFIER	ENSCAFG00000011612-5S_rRNA
-	4	6741274	A	T	8243.88	intergenic_region	MODIFIER	ENSCAFG00000011612-5S_rRNA
-	4	6741466	A	T	2223.88	intergenic_region	MODIFIER	ENSCAFG00000011612-5S_rRNA
-	4	6741651	G	A	12077.7	intergenic_region	MODIFIER	ENSCAFG00000011612-5S_rRNA
-	4	6741689	C	T	12645.1	intergenic_region	MODIFIER	ENSCAFG00000011612-5S_rRNA
-	4	6741719	C	T	2308.33	intergenic_region	MODIFIER	ENSCAFG00000011612-5S_rRNA
-	4	6741789	G	A	2847.09	intergenic_region	MODIFIER	ENSCAFG00000011612-5S_rRNA
-	4	6741925	G	A	2845.26	intergenic_region	MODIFIER	ENSCAFG00000011612-5S_rRNA
-	4	6741948	C	T	7638.12	intergenic_region	MODIFIER	ENSCAFG00000011612-5S_rRNA
-	4	6742150	G	A	12342.5	intergenic_region	MODIFIER	ENSCAFG00000011612-5S_rRNA
-	4	6742153	G	T	11820.2	intergenic_region	MODIFIER	ENSCAFG00000011612-5S_rRNA
-	4	6742387	C	T	12002.5	intergenic_region	MODIFIER	ENSCAFG00000011612-5S_rRNA
-	4	6742395	G	A	14895.2	intergenic_region	MODIFIER	ENSCAFG00000011612-5S_rRNA
-	4	6742421	C	T	8889.98	intergenic_region	MODIFIER	ENSCAFG00000011612-5S_rRNA
-	4	6742438	A	G	9010.04	intergenic_region	MODIFIER	ENSCAFG00000011612-5S_rRNA
-	4	6742454	G	A	3367.05	intergenic_region	MODIFIER	ENSCAFG00000011612-5S_rRNA
-	4	6742606	T	C	12179.2	intergenic_region	MODIFIER	ENSCAFG00000011612-5S_rRNA
-	4	6742678	A	G	948.28	intergenic_region	MODIFIER	ENSCAFG00000011612-5S_rRNA
-	4	6742744	C	A	1769.05	intergenic_region	MODIFIER	ENSCAFG00000011612-5S_rRNA
-	4	6742746	C	A	11142.1	intergenic_region	MODIFIER	ENSCAFG00000011612-5S_rRNA
-	4	6742897	C	T	12872.5	intergenic_region	MODIFIER	ENSCAFG00000011612-5S_rRNA
-	4	6742932	A	G	3079.59	intergenic_region	MODIFIER	ENSCAFG00000011612-5S_rRNA
-	4	6742937	C	T	3097.59	intergenic_region	MODIFIER	ENSCAFG00000011612-5S_rRNA
-	4	6743253	G	A	2842.05	intergenic_region	MODIFIER	ENSCAFG00000011612-5S_rRNA
-	4	6743423	G	A	3864.17	intergenic_region	MODIFIER	ENSCAFG00000011612-5S_rRNA
-	4	6743426	A	G	11819	intergenic_region	MODIFIER	ENSCAFG00000011612-5S_rRNA
-	4	6743461	G	A	4163.96	intergenic_region	MODIFIER	ENSCAFG00000011612-5S_rRNA
-	4	6743465	T	C	4219.86	intergenic_region	MODIFIER	ENSCAFG00000011612-5S_rRNA
-	4	6743505	C	T	7652.68	intergenic_region	MODIFIER	ENSCAFG00000011612-5S_rRNA
-	4	6743667	C	G	2455.27	intergenic_region	MODIFIER	ENSCAFG00000011612-5S_rRNA
-	4	6743701	T	C	10315.9	intergenic_region	MODIFIER	ENSCAFG00000011612-5S_rRNA
-	4	6743702	G	A	8462.3	intergenic_region	MODIFIER	ENSCAFG00000011612-5S_rRNA
-	4	6743735	A	G	6159.34	intergenic_region	MODIFIER	ENSCAFG00000011612-5S_rRNA
-	4	6743817	T	C	2764.93	intergenic_region	MODIFIER	ENSCAFG00000011612-5S_rRNA
-	4	6743837	G	T	1828.04	intergenic_region	MODIFIER	ENSCAFG00000011612-5S_rRNA
-	4	6743851	T	A	1899.2	intergenic_region	MODIFIER	ENSCAFG00000011612-5S_rRNA
-	4	6743897	G	T	1748.17	intergenic_region	MODIFIER	ENSCAFG00000011612-5S_rRNA
-	4	6744010	C	T	11126.5	intergenic_region	MODIFIER	ENSCAFG00000011612-5S_rRNA
-	4	6744017	A	C	3292.03	intergenic_region	MODIFIER	ENSCAFG00000011612-5S_rRNA
-	4	6744117	G	A	3621.08	intergenic_region	MODIFIER	ENSCAFG00000011612-5S_rRNA
-	4	6744141	G	A	14075	intergenic_region	MODIFIER	ENSCAFG00000011612-5S_rRNA
-	4	6744181	G	T	2285.74	intergenic_region	MODIFIER	ENSCAFG00000011612-5S_rRNA
-	4	6744207	C	T	3003.02	intergenic_region	MODIFIER	ENSCAFG00000011612-5S_rRNA
-	4	6744217	G	A	2663.23	intergenic_region	MODIFIER	ENSCAFG00000011612-5S_rRNA
-	4	6744269	C	T	14557.4	intergenic_region	MODIFIER	ENSCAFG00000011612-5S_rRNA
-	4	6744427	C	T	8363.91	intergenic_region	MODIFIER	ENSCAFG00000011612-5S_rRNA
-	4	6744463	C	T	11802	intergenic_region	MODIFIER	ENSCAFG00000011612-5S_rRNA
-	4	6744465	G	A	11399	intergenic_region	MODIFIER	ENSCAFG00000011612-5S_rRNA
-	4	6744597	T	G	1525.36	intergenic_region	MODIFIER	ENSCAFG00000011612-5S_rRNA
-	4	6744656	C	T	2833.14	intergenic_region	MODIFIER	ENSCAFG00000011612-5S_rRNA
-	4	6744657	A	G	2833.14	intergenic_region	MODIFIER	ENSCAFG00000011612-5S_rRNA
-	4	6744670	T	C	7109.75	intergenic_region	MODIFIER	ENSCAFG00000011612-5S_rRNA
-	4	6744775	A	G	2649.25	intergenic_region	MODIFIER	ENSCAFG00000011612-5S_rRNA
-	4	6744797	T	C	8856.61	intergenic_region	MODIFIER	ENSCAFG00000011612-5S_rRNA
-	4	6744816	C	T	2056.87	intergenic_region	MODIFIER	ENSCAFG00000011612-5S_rRNA
-	4	6744884	G	A	467.39	intergenic_region	MODIFIER	ENSCAFG00000011612-5S_rRNA
-	4	6745137	C	T	8638.1	intergenic_region	MODIFIER	ENSCAFG00000011612-5S_rRNA
-	4	6745280	G	A	9835.25	intergenic_region	MODIFIER	ENSCAFG00000011612-5S_rRNA
-	4	6745352	G	T	3165.67	intergenic_region	MODIFIER	ENSCAFG00000011612-5S_rRNA
-	4	6745404	C	T	3299.11	intergenic_region	MODIFIER	ENSCAFG00000011612-5S_rRNA
-	4	6745434	G	A	3734.41	intergenic_region	MODIFIER	ENSCAFG00000011612-5S_rRNA
-	4	6745716	G	T	10480.4	intergenic_region	MODIFIER	ENSCAFG00000011612-5S_rRNA
-	4	6745821	G	A	588.02	intergenic_region	MODIFIER	ENSCAFG00000011612-5S_rRNA
-	4	6746062	T	C	464.13	intergenic_region	MODIFIER	ENSCAFG00000011612-5S_rRNA
-	4	6746181	A	C	559.36	intergenic_region	MODIFIER	ENSCAFG00000011612-5S_rRNA
-	4	6747977	C	T	1911.57	intergenic_region	MODIFIER	ENSCAFG00000011612-5S_rRNA
-	4	6747979	C	T	8312.95	intergenic_region	MODIFIER	ENSCAFG00000011612-5S_rRNA
-	4	6748423	T	C	6173.14	intergenic_region	MODIFIER	ENSCAFG00000011612-5S_rRNA
-	4	6748543	C	T	10148.4	intergenic_region	MODIFIER	ENSCAFG00000011612-5S_rRNA
-	4	6749128	G	C	3240.59	intergenic_region	MODIFIER	ENSCAFG00000011612-5S_rRNA
-	4	6749179	A	C	2821.95	intergenic_region	MODIFIER	ENSCAFG00000011612-5S_rRNA
-	4	6749230	T	G	8798.35	intergenic_region	MODIFIER	ENSCAFG00000011612-5S_rRNA
-	4	6749268	T	C	12025.9	intergenic_region	MODIFIER	ENSCAFG00000011612-5S_rRNA
-	4	6749271	T	A	12109.7	intergenic_region	MODIFIER	ENSCAFG00000011612-5S_rRNA
-	4	6749370	C	T	12494.3	intergenic_region	MODIFIER	ENSCAFG00000011612-5S_rRNA
-	4	6749404	A	G	1308.35	intergenic_region	MODIFIER	ENSCAFG00000011612-5S_rRNA
-	4	6749443	A	C	1805.94	intergenic_region	MODIFIER	ENSCAFG00000011612-5S_rRNA
-	4	6751169	A	G	14406.6	intergenic_region	MODIFIER	ENSCAFG00000011612-5S_rRNA
-	4	6751171	C	A	14406.6	intergenic_region	MODIFIER	ENSCAFG00000011612-5S_rRNA
-	4	6751202	G	C	11833.9	intergenic_region	MODIFIER	ENSCAFG00000011612-5S_rRNA
-	4	6751289	G	A	4022.22	intergenic_region	MODIFIER	ENSCAFG00000011612-5S_rRNA
-	4	6751362	G	A	10202.5	intergenic_region	MODIFIER	ENSCAFG00000011612-5S_rRNA
-	4	6751485	A	G	14084.3	intergenic_region	MODIFIER	ENSCAFG00000011612-5S_rRNA
-	4	6751835	C	T	14569.9	intergenic_region	MODIFIER	ENSCAFG00000011612-5S_rRNA
-	4	6751914	G	T	2435.49	intergenic_region	MODIFIER	ENSCAFG00000011612-5S_rRNA
-	4	6752217	G	A	11211.5	intergenic_region	MODIFIER	ENSCAFG00000011612-5S_rRNA
-	4	6752317	T	C	1452	intergenic_region	MODIFIER	ENSCAFG00000011612-5S_rRNA
-	4	6752409	T	G	1405.84	intergenic_region	MODIFIER	ENSCAFG00000011612-5S_rRNA
-	4	6752536	T	C	8179.56	intergenic_region	MODIFIER	ENSCAFG00000011612-5S_rRNA
-	4	6752745	A	T	9171.68	intergenic_region	MODIFIER	ENSCAFG00000011612-5S_rRNA
-	4	6753132	G	A	8749.49	intergenic_region	MODIFIER	ENSCAFG00000011612-5S_rRNA
-	4	6753150	C	A	11967.6	intergenic_region	MODIFIER	ENSCAFG00000011612-5S_rRNA
-	4	6753151	C	T	12044.6	intergenic_region	MODIFIER	ENSCAFG00000011612-5S_rRNA
-	4	6753156	G	A	12130.5	intergenic_region	MODIFIER	ENSCAFG00000011612-5S_rRNA
-	4	6753422	T	C	3169.99	intergenic_region	MODIFIER	ENSCAFG00000011612-5S_rRNA
-	4	6755188	T	A	382.05	intergenic_region	MODIFIER	ENSCAFG00000011612-5S_rRNA
-	4	6756257	G	C	14253.6	intergenic_region	MODIFIER	ENSCAFG00000011612-5S_rRNA
-	4	6757366	A	G	2098.75	intergenic_region	MODIFIER	ENSCAFG00000011612-5S_rRNA
-	4	6758480	C	T	9564.47	intergenic_region	MODIFIER	ENSCAFG00000011612-5S_rRNA
-	4	6758540	C	T	3159.81	intergenic_region	MODIFIER	ENSCAFG00000011612-5S_rRNA
-	4	6759511	T	C	13003.9	intergenic_region	MODIFIER	ENSCAFG00000011612-5S_rRNA
-	4	6759763	G	A	12762.3	intergenic_region	MODIFIER	ENSCAFG00000011612-5S_rRNA
-	4	6759948	C	T	13151.8	intergenic_region	MODIFIER	ENSCAFG00000011612-5S_rRNA
-	4	6761601	A	G	5993.12	intergenic_region	MODIFIER	ENSCAFG00000011612-5S_rRNA
-	4	6762844	A	T	2674.29	intergenic_region	MODIFIER	ENSCAFG00000011612-5S_rRNA
-	4	6763029	T	C	3126.28	intergenic_region	MODIFIER	ENSCAFG00000011612-5S_rRNA
-	4	6763535	A	G	2662.66	intergenic_region	MODIFIER	ENSCAFG00000011612-5S_rRNA
-	4	6764283	G	T	3139.53	intergenic_region	MODIFIER	ENSCAFG00000011612-5S_rRNA
-	4	6764339	G	A	3209.84	intergenic_region	MODIFIER	ENSCAFG00000011612-5S_rRNA
-	4	6764779	A	G	13000.4	intergenic_region	MODIFIER	ENSCAFG00000011612-5S_rRNA
-	4	6764956	G	A	13880	intergenic_region	MODIFIER	ENSCAFG00000011612-5S_rRNA
-	4	6765154	T	C	1757.25	intergenic_region	MODIFIER	ENSCAFG00000011612-5S_rRNA
-	4	6765291	C	T	7656.48	intergenic_region	MODIFIER	ENSCAFG00000011612-5S_rRNA
-	4	6765349	G	T	11759.9	intergenic_region	MODIFIER	ENSCAFG00000011612-5S_rRNA
-	4	6765370	G	A	11324.7	intergenic_region	MODIFIER	ENSCAFG00000011612-5S_rRNA
-	4	6765696	T	A	4913.98	intergenic_region	MODIFIER	ENSCAFG00000011612-5S_rRNA
-	4	6765787	A	G	5690.97	intergenic_region	MODIFIER	ENSCAFG00000011612-5S_rRNA
-	4	6765895	G	T	7249.05	intergenic_region	MODIFIER	ENSCAFG00000011612-5S_rRNA
-	4	6766001	C	A	2711.73	intergenic_region	MODIFIER	ENSCAFG00000011612-5S_rRNA
-	4	6766052	G	A	1888.3	intergenic_region	MODIFIER	ENSCAFG00000011612-5S_rRNA
-	4	6766214	C	T	1814	intergenic_region	MODIFIER	ENSCAFG00000011612-5S_rRNA
-	4	6766248	A	C	10414.7	intergenic_region	MODIFIER	ENSCAFG00000011612-5S_rRNA
-	4	6766456	A	C	15140.2	intergenic_region	MODIFIER	ENSCAFG00000011612-5S_rRNA
-	4	6766463	A	C	14572.9	intergenic_region	MODIFIER	ENSCAFG00000011612-5S_rRNA
-	4	6767258	C	A	2653.08	intergenic_region	MODIFIER	ENSCAFG00000011612-5S_rRNA
-	4	6767353	A	G	3071.89	intergenic_region	MODIFIER	ENSCAFG00000011612-5S_rRNA
-	4	6767453	C	T	15481.2	intergenic_region	MODIFIER	ENSCAFG00000011612-5S_rRNA
-	4	6767501	T	C	11522.6	intergenic_region	MODIFIER	ENSCAFG00000011612-5S_rRNA
-	4	6767559	G	A	11311.5	intergenic_region	MODIFIER	ENSCAFG00000011612-5S_rRNA
-	4	6767567	T	A	2979.97	intergenic_region	MODIFIER	ENSCAFG00000011612-5S_rRNA
-	4	6767624	A	C	2470.29	intergenic_region	MODIFIER	ENSCAFG00000011612-5S_rRNA
-	4	6767819	C	A	5737.3	intergenic_region	MODIFIER	ENSCAFG00000011612-5S_rRNA
-	4	6767883	G	A	801.54	intergenic_region	MODIFIER	ENSCAFG00000011612-5S_rRNA
-	4	6767921	A	G	5770.45	intergenic_region	MODIFIER	ENSCAFG00000011612-5S_rRNA
-	4	6767942	A	G	1708.87	intergenic_region	MODIFIER	ENSCAFG00000011612-5S_rRNA
-	4	6767945	C	T	6886.85	intergenic_region	MODIFIER	ENSCAFG00000011612-5S_rRNA
-	4	6767952	C	A	1803.92	intergenic_region	MODIFIER	ENSCAFG00000011612-5S_rRNA
-	4	6767978	C	T	6602.89	intergenic_region	MODIFIER	ENSCAFG00000011612-5S_rRNA
-	4	6768202	T	C	9260.85	intergenic_region	MODIFIER	ENSCAFG00000011612-5S_rRNA
-	4	6768344	A	G	1577.7	intergenic_region	MODIFIER	ENSCAFG00000011612-5S_rRNA
-	4	6768603	A	G	3666.82	intergenic_region	MODIFIER	ENSCAFG00000011612-5S_rRNA
-	4	6768836	A	C	2917.44	intergenic_region	MODIFIER	ENSCAFG00000011612-5S_rRNA
-	4	6768884	C	T	10396.2	intergenic_region	MODIFIER	ENSCAFG00000011612-5S_rRNA
-	4	6768916	G	A	2993.24	intergenic_region	MODIFIER	ENSCAFG00000011612-5S_rRNA
-	4	6769059	C	T	2485.11	intergenic_region	MODIFIER	ENSCAFG00000011612-5S_rRNA
-	4	6769097	G	A	1563.09	intergenic_region	MODIFIER	ENSCAFG00000011612-5S_rRNA
-	4	6769244	T	G	1895.09	intergenic_region	MODIFIER	ENSCAFG00000011612-5S_rRNA
-	4	6769420	A	G	2502.79	intergenic_region	MODIFIER	ENSCAFG00000011612-5S_rRNA
-	4	6769425	A	G	11494	intergenic_region	MODIFIER	ENSCAFG00000011612-5S_rRNA
-	4	6769463	G	A	12999.3	intergenic_region	MODIFIER	ENSCAFG00000011612-5S_rRNA
-	4	6769527	G	A	8930.34	intergenic_region	MODIFIER	ENSCAFG00000011612-5S_rRNA
-	4	6771029	C	T	9254.91	intergenic_region	MODIFIER	ENSCAFG00000011612-5S_rRNA
-	4	6771724	T	C	10146.4	intergenic_region	MODIFIER	ENSCAFG00000011612-5S_rRNA
-	4	6771808	T	C	3100.43	intergenic_region	MODIFIER	ENSCAFG00000011612-5S_rRNA
-	4	6772037	C	A	8483.81	intergenic_region	MODIFIER	ENSCAFG00000011612-5S_rRNA
-	4	6772306	G	A	9458.77	intergenic_region	MODIFIER	ENSCAFG00000011612-5S_rRNA
-	4	6772312	A	G	2688.58	intergenic_region	MODIFIER	ENSCAFG00000011612-5S_rRNA
-	4	6772421	C	T	2388.72	intergenic_region	MODIFIER	ENSCAFG00000011612-5S_rRNA
-	4	6772488	C	T	4403.24	intergenic_region	MODIFIER	ENSCAFG00000011612-5S_rRNA
-	4	6772489	A	G	4403.24	intergenic_region	MODIFIER	ENSCAFG00000011612-5S_rRNA
-	4	6772514	G	A	4096.28	intergenic_region	MODIFIER	ENSCAFG00000011612-5S_rRNA
-	4	6772569	T	C	3099.09	intergenic_region	MODIFIER	ENSCAFG00000011612-5S_rRNA
-	4	6772903	G	A	11947.4	intergenic_region	MODIFIER	ENSCAFG00000011612-5S_rRNA
-	4	6773102	C	T	2491.95	intergenic_region	MODIFIER	ENSCAFG00000011612-5S_rRNA
-	4	6773103	A	G	15493.5	intergenic_region	MODIFIER	ENSCAFG00000011612-5S_rRNA
-	4	6773188	C	T	1857.47	intergenic_region	MODIFIER	ENSCAFG00000011612-5S_rRNA
-	4	6773231	A	G	3753.15	intergenic_region	MODIFIER	ENSCAFG00000011612-5S_rRNA
-	4	6773236	T	G	3823.02	intergenic_region	MODIFIER	ENSCAFG00000011612-5S_rRNA
-	4	6773490	A	T	12153.5	intergenic_region	MODIFIER	ENSCAFG00000011612-5S_rRNA
-	4	6774037	T	C	7768.92	intergenic_region	MODIFIER	ENSCAFG00000011612-5S_rRNA
-	4	6774106	G	A	11869.9	intergenic_region	MODIFIER	ENSCAFG00000011612-5S_rRNA
-	4	6774189	C	T	1701.99	intergenic_region	MODIFIER	ENSCAFG00000011612-5S_rRNA
-	4	6774295	C	A	8405.66	intergenic_region	MODIFIER	ENSCAFG00000011612-5S_rRNA
-	4	6774949	A	G	2055.56	intergenic_region	MODIFIER	ENSCAFG00000011612-5S_rRNA
-	4	6774993	G	C	6845.31	intergenic_region	MODIFIER	ENSCAFG00000011612-5S_rRNA
-	4	6775420	G	A	2425.84	intergenic_region	MODIFIER	ENSCAFG00000011612-5S_rRNA
-	4	6775651	C	T	14193.5	intergenic_region	MODIFIER	ENSCAFG00000011612-5S_rRNA
-	4	6775824	G	T	8612.77	intergenic_region	MODIFIER	ENSCAFG00000011612-5S_rRNA
-	4	6775843	C	T	11885.1	intergenic_region	MODIFIER	ENSCAFG00000011612-5S_rRNA
-	4	6775844	A	G	11885.1	intergenic_region	MODIFIER	ENSCAFG00000011612-5S_rRNA
-	4	6775945	G	A	3403.57	intergenic_region	MODIFIER	ENSCAFG00000011612-5S_rRNA
-	4	6776002	G	A	2835.65	intergenic_region	MODIFIER	ENSCAFG00000011612-5S_rRNA
-	4	6776021	G	A	2667.34	intergenic_region	MODIFIER	ENSCAFG00000011612-5S_rRNA
-	4	6778731	C	T	6636.58	intergenic_region	MODIFIER	ENSCAFG00000011612-5S_rRNA
-	4	6779734	C	T	2558.71	intergenic_region	MODIFIER	ENSCAFG00000011612-5S_rRNA
-	4	6780634	G	A	9368.75	intergenic_region	MODIFIER	ENSCAFG00000011612-5S_rRNA
-	4	6780795	C	T	7420.68	intergenic_region	MODIFIER	ENSCAFG00000011612-5S_rRNA
-	4	6781164	G	A	2801.33	intergenic_region	MODIFIER	ENSCAFG00000011612-5S_rRNA
-	4	6781626	C	T	3058.1	intergenic_region	MODIFIER	ENSCAFG00000011612-5S_rRNA
-	4	6781803	C	G	9908.13	intergenic_region	MODIFIER	ENSCAFG00000011612-5S_rRNA
-	4	6781922	G	A	8912.21	intergenic_region	MODIFIER	ENSCAFG00000011612-5S_rRNA
-	4	6783135	C	A	8602.29	intergenic_region	MODIFIER	ENSCAFG00000011612-5S_rRNA
-	4	6783864	T	G	10502.1	intergenic_region	MODIFIER	ENSCAFG00000011612-5S_rRNA
-	4	6784390	T	C	3164.99	intergenic_region	MODIFIER	ENSCAFG00000011612-5S_rRNA
-	4	6784489	T	C	6982.15	intergenic_region	MODIFIER	ENSCAFG00000011612-5S_rRNA
-	4	6784715	G	A	592.12	intergenic_region	MODIFIER	ENSCAFG00000011612-5S_rRNA
-	4	6784944	G	A	10111.2	intergenic_region	MODIFIER	ENSCAFG00000011612-5S_rRNA
-	4	6784962	A	G	2211.73	intergenic_region	MODIFIER	ENSCAFG00000011612-5S_rRNA
-	4	6785161	G	A	657.15	intergenic_region	MODIFIER	ENSCAFG00000011612-5S_rRNA
-	4	6785234	C	T	574.26	intergenic_region	MODIFIER	ENSCAFG00000011612-5S_rRNA
-	4	6785328	G	C	9895.77	intergenic_region	MODIFIER	ENSCAFG00000011612-5S_rRNA
-	4	6785365	A	T	7006.23	intergenic_region	MODIFIER	ENSCAFG00000011612-5S_rRNA
-	4	6785551	C	T	8079.65	intergenic_region	MODIFIER	ENSCAFG00000011612-5S_rRNA
-	4	6785867	T	C	1943.4	intergenic_region	MODIFIER	ENSCAFG00000011612-5S_rRNA
-	4	6786139	C	T	3011.78	intergenic_region	MODIFIER	ENSCAFG00000011612-5S_rRNA
-	4	6786260	C	T	15956.9	intergenic_region	MODIFIER	ENSCAFG00000011612-5S_rRNA
-	4	6786442	G	C	1982.64	intergenic_region	MODIFIER	ENSCAFG00000011612-5S_rRNA
-	4	6786538	C	T	645.56	intergenic_region	MODIFIER	ENSCAFG00000011612-5S_rRNA
-	4	6786587	A	G	793.38	intergenic_region	MODIFIER	ENSCAFG00000011612-5S_rRNA
-	4	6786683	T	C	8885.71	intergenic_region	MODIFIER	ENSCAFG00000011612-5S_rRNA
-	4	6786868	G	C	16682.2	intergenic_region	MODIFIER	ENSCAFG00000011612-5S_rRNA
-	4	6786915	C	T	901.86	intergenic_region	MODIFIER	ENSCAFG00000011612-5S_rRNA
-	4	6787014	T	C	878.17	intergenic_region	MODIFIER	ENSCAFG00000011612-5S_rRNA
-	4	6787038	A	T	2772.27	intergenic_region	MODIFIER	ENSCAFG00000011612-5S_rRNA
-	4	6787077	G	A	975.87	intergenic_region	MODIFIER	ENSCAFG00000011612-5S_rRNA
-	4	6787213	T	G	12948.7	intergenic_region	MODIFIER	ENSCAFG00000011612-5S_rRNA
-	4	6787253	G	A	9474.91	intergenic_region	MODIFIER	ENSCAFG00000011612-5S_rRNA
-	4	6787265	G	A	1846.11	intergenic_region	MODIFIER	ENSCAFG00000011612-5S_rRNA
-	4	6787377	A	C	1651.19	intergenic_region	MODIFIER	ENSCAFG00000011612-5S_rRNA
-	4	6787446	A	G	8658.84	intergenic_region	MODIFIER	ENSCAFG00000011612-5S_rRNA
-	4	6787578	T	C	17340.7	intergenic_region	MODIFIER	ENSCAFG00000011612-5S_rRNA
-	4	6787583	T	C	17237.7	intergenic_region	MODIFIER	ENSCAFG00000011612-5S_rRNA
-	4	6787649	G	A	16141.7	intergenic_region	MODIFIER	ENSCAFG00000011612-5S_rRNA
-	4	6787708	C	T	1679.87	intergenic_region	MODIFIER	ENSCAFG00000011612-5S_rRNA
-	4	6788231	G	A	9763.77	intergenic_region	MODIFIER	ENSCAFG00000011612-5S_rRNA
-	4	6788260	G	A	1236.27	intergenic_region	MODIFIER	ENSCAFG00000011612-5S_rRNA
-	4	6788293	G	T	1812.22	intergenic_region	MODIFIER	ENSCAFG00000011612-5S_rRNA
-	4	6789155	C	G	12096.9	intergenic_region	MODIFIER	ENSCAFG00000011612-5S_rRNA
-	4	6789788	A	C	9967.48	intergenic_region	MODIFIER	ENSCAFG00000011612-5S_rRNA
-	4	6790226	A	C	893.28	intergenic_region	MODIFIER	ENSCAFG00000011612-5S_rRNA
-	4	6790405	T	C	14300.8	intergenic_region	MODIFIER	ENSCAFG00000011612-5S_rRNA
-	4	6790500	A	G	14199.4	intergenic_region	MODIFIER	ENSCAFG00000011612-5S_rRNA
-	4	6790588	G	A	662.43	intergenic_region	MODIFIER	ENSCAFG00000011612-5S_rRNA
-	4	6792211	G	A	414.88	intergenic_region	MODIFIER	ENSCAFG00000011612-5S_rRNA
-	4	6792805	A	G	10446.7	intergenic_region	MODIFIER	ENSCAFG00000011612-5S_rRNA
-	4	6792853	G	A	1733.55	intergenic_region	MODIFIER	ENSCAFG00000011612-5S_rRNA
-	4	6793281	A	T	10101.2	intergenic_region	MODIFIER	ENSCAFG00000011612-5S_rRNA
-	4	6793555	T	C	2773.61	intergenic_region	MODIFIER	ENSCAFG00000011612-5S_rRNA
-	4	6793622	G	A	737.86	intergenic_region	MODIFIER	ENSCAFG00000011612-5S_rRNA
-	4	6793628	A	G	1978.45	intergenic_region	MODIFIER	ENSCAFG00000011612-5S_rRNA
-	4	6793645	G	A	1943.93	intergenic_region	MODIFIER	ENSCAFG00000011612-5S_rRNA
-	4	6793646	A	G	9283.59	intergenic_region	MODIFIER	ENSCAFG00000011612-5S_rRNA
-	4	6794266	G	T	17068.5	intergenic_region	MODIFIER	ENSCAFG00000011612-5S_rRNA
-	4	6794401	T	C	1785.83	intergenic_region	MODIFIER	ENSCAFG00000011612-5S_rRNA
-	4	6795164	A	G	2689.24	intergenic_region	MODIFIER	ENSCAFG00000011612-5S_rRNA
-	4	6795495	T	A	1601.75	intergenic_region	MODIFIER	ENSCAFG00000011612-5S_rRNA
-	4	6795806	G	T	12906.3	intergenic_region	MODIFIER	ENSCAFG00000011612-5S_rRNA
-	4	6795937	A	G	8988.73	intergenic_region	MODIFIER	ENSCAFG00000011612-5S_rRNA
-	4	6796014	G	A	11579.1	intergenic_region	MODIFIER	ENSCAFG00000011612-5S_rRNA
-	4	6796253	C	T	10356.1	intergenic_region	MODIFIER	ENSCAFG00000011612-5S_rRNA
-	4	6796461	A	G	10626.9	intergenic_region	MODIFIER	ENSCAFG00000011612-5S_rRNA
-	4	6796719	G	A	543.32	intergenic_region	MODIFIER	ENSCAFG00000011612-5S_rRNA
-	4	6796744	C	A	2601.72	intergenic_region	MODIFIER	ENSCAFG00000011612-5S_rRNA
-	4	6796957	G	A	14550.3	intergenic_region	MODIFIER	ENSCAFG00000011612-5S_rRNA
-	4	6797020	C	T	9811.73	intergenic_region	MODIFIER	ENSCAFG00000011612-5S_rRNA
-	4	6797128	C	T	89.99	intergenic_region	MODIFIER	ENSCAFG00000011612-5S_rRNA
-	4	6797201	G	A	1590.52	intergenic_region	MODIFIER	ENSCAFG00000011612-5S_rRNA
-	4	6797312	A	T	590.07	intergenic_region	MODIFIER	ENSCAFG00000011612-5S_rRNA
-	4	6797416	G	C	1693.44	upstream_gene_variant	MODIFIER	5S_rRNA
-	4	6797453	A	C	9194.18	upstream_gene_variant	MODIFIER	5S_rRNA
-	4	6797522	A	G	12522.9	upstream_gene_variant	MODIFIER	5S_rRNA
-	4	6797805	G	A	807.84	upstream_gene_variant	MODIFIER	5S_rRNA
-	4	6797814	G	A	2872.66	upstream_gene_variant	MODIFIER	5S_rRNA
-	4	6797953	C	T	3016.14	upstream_gene_variant	MODIFIER	5S_rRNA
-	4	6797965	A	C	3090.77	upstream_gene_variant	MODIFIER	5S_rRNA
-	4	6797996	T	C	2453.86	upstream_gene_variant	MODIFIER	5S_rRNA
-	4	6798255	C	T	10259.6	upstream_gene_variant	MODIFIER	5S_rRNA
-	4	6798298	A	G	532.84	upstream_gene_variant	MODIFIER	5S_rRNA
-	4	6798395	G	A	709.11	upstream_gene_variant	MODIFIER	5S_rRNA
-	4	6800382	A	G	2121.03	upstream_gene_variant	MODIFIER	5S_rRNA
-	4	6800390	A	G	9836.99	upstream_gene_variant	MODIFIER	5S_rRNA
-	4	6801619	G	A	3132.34	upstream_gene_variant	MODIFIER	5S_rRNA
-	4	6801844	T	C	10961.2	upstream_gene_variant	MODIFIER	5S_rRNA
-	4	6801870	T	C	3120.52	upstream_gene_variant	MODIFIER	5S_rRNA
-	4	6802500	T	C	191.78	downstream_gene_variant	MODIFIER	5S_rRNA
-	4	6802697	T	C	10336.6	downstream_gene_variant	MODIFIER	5S_rRNA
-	4	6802938	G	T	3663.06	downstream_gene_variant	MODIFIER	5S_rRNA
-	4	6803022	C	A	9019.67	downstream_gene_variant	MODIFIER	5S_rRNA
-	4	6803139	A	C	8153.24	downstream_gene_variant	MODIFIER	5S_rRNA
-	4	6803323	G	A	1428.63	downstream_gene_variant	MODIFIER	5S_rRNA
-	4	6803691	G	A	2665.42	downstream_gene_variant	MODIFIER	5S_rRNA
-	4	6803978	G	A	13538.7	downstream_gene_variant	MODIFIER	5S_rRNA
-	4	6804011	G	C	9761.15	downstream_gene_variant	MODIFIER	5S_rRNA
-	4	6804336	T	G	8598.36	downstream_gene_variant	MODIFIER	5S_rRNA
-	4	6804414	T	C	7600.61	downstream_gene_variant	MODIFIER	5S_rRNA
-	4	6804590	T	C	8943.15	downstream_gene_variant	MODIFIER	5S_rRNA
-	4	6804839	A	G	7067.1	downstream_gene_variant	MODIFIER	5S_rRNA
-	4	6805371	G	A	2619.94	downstream_gene_variant	MODIFIER	5S_rRNA
-	4	6805421	T	C	2516.04	downstream_gene_variant	MODIFIER	5S_rRNA
-	4	6806113	C	T	3118.17	downstream_gene_variant	MODIFIER	5S_rRNA
-	4	6806452	C	T	9576.02	downstream_gene_variant	MODIFIER	5S_rRNA
-	4	6807183	C	T	2873.13	downstream_gene_variant	MODIFIER	5S_rRNA
-	4	6807207	A	G	2693.46	downstream_gene_variant	MODIFIER	5S_rRNA
-	4	6808847	G	A	162.73	intergenic_region	MODIFIER	5S_rRNA-ENSCAFG00000011616
-	4	6808902	C	T	9946.05	intergenic_region	MODIFIER	5S_rRNA-ENSCAFG00000011616
-	4	6808951	C	T	10350.2	intergenic_region	MODIFIER	5S_rRNA-ENSCAFG00000011616
-	4	6809058	A	G	2379.13	intergenic_region	MODIFIER	5S_rRNA-ENSCAFG00000011616
-	4	6809171	C	A	10346.8	intergenic_region	MODIFIER	5S_rRNA-ENSCAFG00000011616
-	4	6809662	A	G	4196.55	intergenic_region	MODIFIER	5S_rRNA-ENSCAFG00000011616
-	4	6810153	A	G	9787.11	intergenic_region	MODIFIER	5S_rRNA-ENSCAFG00000011616
-	4	6810614	G	A	8968.66	intergenic_region	MODIFIER	5S_rRNA-ENSCAFG00000011616
-	4	6810768	T	A	8922.47	intergenic_region	MODIFIER	5S_rRNA-ENSCAFG00000011616
-	4	6810797	G	A	2818.53	intergenic_region	MODIFIER	5S_rRNA-ENSCAFG00000011616
-	4	6810852	G	C	9465.92	intergenic_region	MODIFIER	5S_rRNA-ENSCAFG00000011616
-	4	6810854	G	C	3835.91	intergenic_region	MODIFIER	5S_rRNA-ENSCAFG00000011616
-	4	6811043	C	T	3357.73	intergenic_region	MODIFIER	5S_rRNA-ENSCAFG00000011616
-	4	6811236	G	C	12425.8	intergenic_region	MODIFIER	5S_rRNA-ENSCAFG00000011616
-	4	6811342	C	T	13397.8	intergenic_region	MODIFIER	5S_rRNA-ENSCAFG00000011616
-	4	6811347	C	A	4243.15	intergenic_region	MODIFIER	5S_rRNA-ENSCAFG00000011616
-	4	6811539	G	T	9171.61	intergenic_region	MODIFIER	5S_rRNA-ENSCAFG00000011616
-	4	6813193	G	A	12088.7	intergenic_region	MODIFIER	5S_rRNA-ENSCAFG00000011616
-	4	6813246	C	T	8293.17	intergenic_region	MODIFIER	5S_rRNA-ENSCAFG00000011616
-	4	6813509	T	C	3434.71	intergenic_region	MODIFIER	5S_rRNA-ENSCAFG00000011616
-	4	6814234	C	T	3940.4	intergenic_region	MODIFIER	5S_rRNA-ENSCAFG00000011616
-	4	6814765	T	C	9078.37	intergenic_region	MODIFIER	5S_rRNA-ENSCAFG00000011616
-	4	6815406	A	G	3197.06	intergenic_region	MODIFIER	5S_rRNA-ENSCAFG00000011616
-	4	6816399	T	C	11681.4	intergenic_region	MODIFIER	5S_rRNA-ENSCAFG00000011616
-	4	6816595	A	T	2555.73	intergenic_region	MODIFIER	5S_rRNA-ENSCAFG00000011616
-	4	6818339	C	T	2265.63	intergenic_region	MODIFIER	5S_rRNA-ENSCAFG00000011616
-	4	6819184	G	A	9000.81	intergenic_region	MODIFIER	5S_rRNA-ENSCAFG00000011616
-	4	6820369	G	A	2516.23	intergenic_region	MODIFIER	5S_rRNA-ENSCAFG00000011616
-	4	6820372	A	G	7833.91	intergenic_region	MODIFIER	5S_rRNA-ENSCAFG00000011616
-	4	6820421	C	G	1911.89	intergenic_region	MODIFIER	5S_rRNA-ENSCAFG00000011616
-	4	6820622	A	T	1949.44	intergenic_region	MODIFIER	5S_rRNA-ENSCAFG00000011616
-	4	6821165	G	T	13432.1	intergenic_region	MODIFIER	5S_rRNA-ENSCAFG00000011616
-	4	6821236	G	A	2447.18	intergenic_region	MODIFIER	5S_rRNA-ENSCAFG00000011616
-	4	6821377	G	C	1445.34	intergenic_region	MODIFIER	5S_rRNA-ENSCAFG00000011616
-	4	6821449	A	G	1317.07	intergenic_region	MODIFIER	5S_rRNA-ENSCAFG00000011616
-	4	6821746	A	G	9231.78	intergenic_region	MODIFIER	5S_rRNA-ENSCAFG00000011616
-	4	6822115	G	A	3708.07	intergenic_region	MODIFIER	5S_rRNA-ENSCAFG00000011616
-	4	6822261	C	T	13714.1	intergenic_region	MODIFIER	5S_rRNA-ENSCAFG00000011616
-	4	6822567	C	A	13999.7	intergenic_region	MODIFIER	5S_rRNA-ENSCAFG00000011616
-	4	6822652	G	A	4026.99	intergenic_region	MODIFIER	5S_rRNA-ENSCAFG00000011616
-	4	6822659	A	C	3998.74	intergenic_region	MODIFIER	5S_rRNA-ENSCAFG00000011616
-	4	6822663	A	C	14854.5	intergenic_region	MODIFIER	5S_rRNA-ENSCAFG00000011616
-	4	6822938	C	T	2644.85	intergenic_region	MODIFIER	5S_rRNA-ENSCAFG00000011616
-	4	6823460	T	C	9508.58	intergenic_region	MODIFIER	5S_rRNA-ENSCAFG00000011616
-	4	6823667	A	G	7390.89	intergenic_region	MODIFIER	5S_rRNA-ENSCAFG00000011616
-	4	6823965	A	T	11916.7	intergenic_region	MODIFIER	5S_rRNA-ENSCAFG00000011616
-	4	6823987	C	G	3477.32	intergenic_region	MODIFIER	5S_rRNA-ENSCAFG00000011616
-	4	6824092	C	T	2764.69	intergenic_region	MODIFIER	5S_rRNA-ENSCAFG00000011616
-	4	6824221	G	A	1647.35	intergenic_region	MODIFIER	5S_rRNA-ENSCAFG00000011616
-	4	6824668	G	A	7873.39	intergenic_region	MODIFIER	5S_rRNA-ENSCAFG00000011616
-	4	6824809	G	A	1950.88	intergenic_region	MODIFIER	5S_rRNA-ENSCAFG00000011616
-	4	6825388	C	G	9690.59	intergenic_region	MODIFIER	5S_rRNA-ENSCAFG00000011616
-	4	6825504	G	A	10405.4	intergenic_region	MODIFIER	5S_rRNA-ENSCAFG00000011616
-	4	6825592	G	A	2608.19	intergenic_region	MODIFIER	5S_rRNA-ENSCAFG00000011616
-	4	6825723	T	A	13459.7	intergenic_region	MODIFIER	5S_rRNA-ENSCAFG00000011616
-	4	6825889	T	G	2683.42	intergenic_region	MODIFIER	5S_rRNA-ENSCAFG00000011616
-	4	6825920	C	T	9193.17	intergenic_region	MODIFIER	5S_rRNA-ENSCAFG00000011616
-	4	6825969	C	A	13227.9	intergenic_region	MODIFIER	5S_rRNA-ENSCAFG00000011616
-	4	6826059	G	A	10382.5	intergenic_region	MODIFIER	5S_rRNA-ENSCAFG00000011616
-	4	6826065	C	T	2703.46	intergenic_region	MODIFIER	5S_rRNA-ENSCAFG00000011616
-	4	6826173	A	C	1310.3	intergenic_region	MODIFIER	5S_rRNA-ENSCAFG00000011616
-	4	6826271	G	A	2570.45	intergenic_region	MODIFIER	5S_rRNA-ENSCAFG00000011616
-	4	6826323	C	A	2999.1	intergenic_region	MODIFIER	5S_rRNA-ENSCAFG00000011616
-	4	6826327	T	C	3014.14	intergenic_region	MODIFIER	5S_rRNA-ENSCAFG00000011616
-	4	6826448	T	C	3433.37	intergenic_region	MODIFIER	5S_rRNA-ENSCAFG00000011616
-	4	6826589	A	G	3180.05	intergenic_region	MODIFIER	5S_rRNA-ENSCAFG00000011616
-	4	6827102	G	A	4117.24	intergenic_region	MODIFIER	5S_rRNA-ENSCAFG00000011616
-	4	6827942	A	G	3961.55	intergenic_region	MODIFIER	5S_rRNA-ENSCAFG00000011616
-	4	6827973	T	G	3272.57	intergenic_region	MODIFIER	5S_rRNA-ENSCAFG00000011616
-	4	6828055	T	C	10442.9	intergenic_region	MODIFIER	5S_rRNA-ENSCAFG00000011616
-	4	6828069	A	C	13339	intergenic_region	MODIFIER	5S_rRNA-ENSCAFG00000011616
-	4	6828400	G	T	1728.88	intergenic_region	MODIFIER	5S_rRNA-ENSCAFG00000011616
-	4	6828423	T	C	1610.68	intergenic_region	MODIFIER	5S_rRNA-ENSCAFG00000011616
-	4	6828494	T	A	2339.34	intergenic_region	MODIFIER	5S_rRNA-ENSCAFG00000011616
-	4	6828708	G	A	7193.42	intergenic_region	MODIFIER	5S_rRNA-ENSCAFG00000011616
-	4	6829681	C	G	8022.5	intergenic_region	MODIFIER	5S_rRNA-ENSCAFG00000011616
-	4	7242639	G	A	672.5	intergenic_region	MODIFIER	SIPA1L2-DISC1
-	4	7243178	T	C	1156.02	intergenic_region	MODIFIER	SIPA1L2-DISC1
-	4	7243400	C	T	6839.62	intergenic_region	MODIFIER	SIPA1L2-DISC1
-	4	7243418	A	G	15161.2	intergenic_region	MODIFIER	SIPA1L2-DISC1
-	4	7243497	T	A	17066.9	intergenic_region	MODIFIER	SIPA1L2-DISC1
-	4	7243505	T	G	1019.25	intergenic_region	MODIFIER	SIPA1L2-DISC1
-	4	7245206	A	C	9679.05	intergenic_region	MODIFIER	SIPA1L2-DISC1
-	4	7245313	G	A	466.82	intergenic_region	MODIFIER	SIPA1L2-DISC1
-	4	7245694	G	A	4951.42	intergenic_region	MODIFIER	SIPA1L2-DISC1
-	4	7245900	G	A	7350.44	intergenic_region	MODIFIER	SIPA1L2-DISC1
-	4	7245907	C	T	7478.82	intergenic_region	MODIFIER	SIPA1L2-DISC1
-	4	7246114	A	G	4850.94	intergenic_region	MODIFIER	SIPA1L2-DISC1
-	4	7246147	G	A	16969.1	intergenic_region	MODIFIER	SIPA1L2-DISC1
-	4	7246200	A	G	16646.3	intergenic_region	MODIFIER	SIPA1L2-DISC1
-	4	7246477	A	C	910.61	intergenic_region	MODIFIER	SIPA1L2-DISC1
-	4	7246627	G	A	7407.3	intergenic_region	MODIFIER	SIPA1L2-DISC1
-	4	7246650	T	C	5380.95	intergenic_region	MODIFIER	SIPA1L2-DISC1
-	4	7246686	C	T	674.31	intergenic_region	MODIFIER	SIPA1L2-DISC1
-	4	7246724	G	C	829.66	intergenic_region	MODIFIER	SIPA1L2-DISC1
-	4	7246769	T	C	9286.84	intergenic_region	MODIFIER	SIPA1L2-DISC1
-	4	7246963	G	A	705.12	intergenic_region	MODIFIER	SIPA1L2-DISC1
-	4	7247005	A	G	610.05	intergenic_region	MODIFIER	SIPA1L2-DISC1
-	4	7247490	T	G	5264.63	intergenic_region	MODIFIER	SIPA1L2-DISC1
-	4	7247720	G	A	4596.12	intergenic_region	MODIFIER	SIPA1L2-DISC1
-	4	7247747	C	T	5373.85	intergenic_region	MODIFIER	SIPA1L2-DISC1
-	4	7247773	C	T	5052.53	intergenic_region	MODIFIER	SIPA1L2-DISC1
-	4	7247822	T	A	6986.23	intergenic_region	MODIFIER	SIPA1L2-DISC1
-	4	7247844	C	T	5667.71	intergenic_region	MODIFIER	SIPA1L2-DISC1
-	4	7247931	C	T	3423.62	intergenic_region	MODIFIER	SIPA1L2-DISC1
-	4	7247997	A	C	296.8	intergenic_region	MODIFIER	SIPA1L2-DISC1
-	4	7248047	G	A	3269.18	intergenic_region	MODIFIER	SIPA1L2-DISC1
-	4	7248073	G	A	9923.3	intergenic_region	MODIFIER	SIPA1L2-DISC1
-	4	7248098	G	A	980.83	intergenic_region	MODIFIER	SIPA1L2-DISC1
-	4	7248124	G	A	5314.91	intergenic_region	MODIFIER	SIPA1L2-DISC1
-	4	7248263	C	T	397.12	intergenic_region	MODIFIER	SIPA1L2-DISC1
-	4	7248273	C	G	6108.38	intergenic_region	MODIFIER	SIPA1L2-DISC1
-	4	7248307	G	A	4309.28	intergenic_region	MODIFIER	SIPA1L2-DISC1
-	4	7249619	T	C	7707.29	intergenic_region	MODIFIER	SIPA1L2-DISC1
-	4	7249655	T	C	14089.6	intergenic_region	MODIFIER	SIPA1L2-DISC1
-	4	7249787	T	G	12898.8	intergenic_region	MODIFIER	SIPA1L2-DISC1
-	4	7249814	T	C	931.09	intergenic_region	MODIFIER	SIPA1L2-DISC1
-	4	7250032	G	A	6041.47	intergenic_region	MODIFIER	SIPA1L2-DISC1
-	4	7250303	G	T	12968.8	intergenic_region	MODIFIER	SIPA1L2-DISC1
-	4	7250307	A	G	6974.3	intergenic_region	MODIFIER	SIPA1L2-DISC1
-	4	7250818	C	T	6354.21	intergenic_region	MODIFIER	SIPA1L2-DISC1
-	4	7251234	G	A	7245.9	intergenic_region	MODIFIER	SIPA1L2-DISC1
-	4	7251536	A	G	8243.59	intergenic_region	MODIFIER	SIPA1L2-DISC1
-	4	7251714	T	A	8057.2	intergenic_region	MODIFIER	SIPA1L2-DISC1
-	4	7251817	A	T	1144.13	intergenic_region	MODIFIER	SIPA1L2-DISC1
-	4	7252062	C	T	794.35	intergenic_region	MODIFIER	SIPA1L2-DISC1
-	4	7252187	A	C	5661.29	intergenic_region	MODIFIER	SIPA1L2-DISC1
-	4	7252242	C	T	1021.13	intergenic_region	MODIFIER	SIPA1L2-DISC1
-	4	7252756	G	A	1066.11	intergenic_region	MODIFIER	SIPA1L2-DISC1
-	4	7252991	G	A	5328.94	intergenic_region	MODIFIER	SIPA1L2-DISC1
-	4	7253059	G	A	6006.54	intergenic_region	MODIFIER	SIPA1L2-DISC1
-	4	7253094	T	C	5168.49	intergenic_region	MODIFIER	SIPA1L2-DISC1
-	4	7254031	G	A	1529.49	intergenic_region	MODIFIER	SIPA1L2-DISC1
-	4	7254054	C	T	4990.88	intergenic_region	MODIFIER	SIPA1L2-DISC1
-	4	7254760	T	C	15900.2	intergenic_region	MODIFIER	SIPA1L2-DISC1
-	4	7254769	C	A	15994.2	intergenic_region	MODIFIER	SIPA1L2-DISC1
-	4	7255191	G	A	7559.53	intergenic_region	MODIFIER	SIPA1L2-DISC1
-	4	7255410	C	G	9416.18	intergenic_region	MODIFIER	SIPA1L2-DISC1
-	4	7255505	A	G	769.25	intergenic_region	MODIFIER	SIPA1L2-DISC1
-	4	7256009	C	A	6991.46	intergenic_region	MODIFIER	SIPA1L2-DISC1
-	4	7256100	T	C	1481.59	intergenic_region	MODIFIER	SIPA1L2-DISC1
-	4	7256154	G	A	1066.37	intergenic_region	MODIFIER	SIPA1L2-DISC1
-	4	7256504	G	A	5603.56	intergenic_region	MODIFIER	SIPA1L2-DISC1
-	4	7256600	C	T	5786.88	intergenic_region	MODIFIER	SIPA1L2-DISC1
-	4	7256938	T	C	8193.18	intergenic_region	MODIFIER	SIPA1L2-DISC1
-	4	7256939	G	T	8193.18	intergenic_region	MODIFIER	SIPA1L2-DISC1
-	4	7257596	G	A	8370.24	intergenic_region	MODIFIER	SIPA1L2-DISC1
-	4	7257636	G	A	6394.02	intergenic_region	MODIFIER	SIPA1L2-DISC1
-	4	7257821	C	T	5434.74	intergenic_region	MODIFIER	SIPA1L2-DISC1
-	4	7258447	G	A	5119.01	intergenic_region	MODIFIER	SIPA1L2-DISC1
-	4	7258495	C	T	3604.5	intergenic_region	MODIFIER	SIPA1L2-DISC1
-	4	7258802	C	T	1072.34	intergenic_region	MODIFIER	SIPA1L2-DISC1
-	4	7258880	G	A	1183.31	intergenic_region	MODIFIER	SIPA1L2-DISC1
-	4	7258957	C	T	16023.5	intergenic_region	MODIFIER	SIPA1L2-DISC1
-	4	7259000	T	A	10997.2	intergenic_region	MODIFIER	SIPA1L2-DISC1
-	4	7259156	C	T	995.29	intergenic_region	MODIFIER	SIPA1L2-DISC1
-	4	7259186	G	A	1106.3	intergenic_region	MODIFIER	SIPA1L2-DISC1
-	4	7259187	G	A	1106.1	intergenic_region	MODIFIER	SIPA1L2-DISC1
-	4	7259261	T	A	11092.2	intergenic_region	MODIFIER	SIPA1L2-DISC1
-	4	7259406	C	T	7042.77	intergenic_region	MODIFIER	SIPA1L2-DISC1
-	4	7259653	T	C	7362.7	intergenic_region	MODIFIER	SIPA1L2-DISC1
-	4	7260134	G	A	820.35	intergenic_region	MODIFIER	SIPA1L2-DISC1
-	4	7260426	C	A	13179	intergenic_region	MODIFIER	SIPA1L2-DISC1
-	4	7260652	G	C	13078.1	intergenic_region	MODIFIER	SIPA1L2-DISC1
-	4	7260737	T	C	1173.27	intergenic_region	MODIFIER	SIPA1L2-DISC1
-	4	7260950	C	A	5017.29	intergenic_region	MODIFIER	SIPA1L2-DISC1
-	4	7261201	T	C	7776.9	intergenic_region	MODIFIER	SIPA1L2-DISC1
-	4	7261258	G	A	4369.85	intergenic_region	MODIFIER	SIPA1L2-DISC1
-	4	7261307	A	G	13547.2	intergenic_region	MODIFIER	SIPA1L2-DISC1
-	4	7261648	C	A	939.09	intergenic_region	MODIFIER	SIPA1L2-DISC1
-	4	7261872	C	A	678.53	intergenic_region	MODIFIER	SIPA1L2-DISC1
-	4	7261961	G	A	10765.9	intergenic_region	MODIFIER	SIPA1L2-DISC1
-	4	7262069	A	C	698.19	intergenic_region	MODIFIER	SIPA1L2-DISC1
-	4	7262153	C	A	999.53	intergenic_region	MODIFIER	SIPA1L2-DISC1
-	4	7262623	G	A	904.28	intergenic_region	MODIFIER	SIPA1L2-DISC1
-	4	7262743	C	T	5834.92	intergenic_region	MODIFIER	SIPA1L2-DISC1
-	4	7263073	A	C	324.47	intergenic_region	MODIFIER	SIPA1L2-DISC1
-	4	7263449	A	T	4377.24	intergenic_region	MODIFIER	SIPA1L2-DISC1
-	4	7263482	G	A	4970.89	intergenic_region	MODIFIER	SIPA1L2-DISC1
-	4	7263494	T	G	7206.29	intergenic_region	MODIFIER	SIPA1L2-DISC1
-	4	7263579	G	A	8303.98	intergenic_region	MODIFIER	SIPA1L2-DISC1
-	4	7263581	G	T	8155.56	intergenic_region	MODIFIER	SIPA1L2-DISC1
-	4	7263671	C	T	4915.96	intergenic_region	MODIFIER	SIPA1L2-DISC1
-	4	7263874	T	C	8149.58	intergenic_region	MODIFIER	SIPA1L2-DISC1
-	4	7264465	C	T	603.82	intergenic_region	MODIFIER	SIPA1L2-DISC1
-	4	7264697	G	A	887.3	intergenic_region	MODIFIER	SIPA1L2-DISC1
-	4	7264845	T	C	824.47	intergenic_region	MODIFIER	SIPA1L2-DISC1
-	4	7265008	G	A	697.02	intergenic_region	MODIFIER	SIPA1L2-DISC1
-	4	7265314	G	A	465.74	intergenic_region	MODIFIER	SIPA1L2-DISC1
-	4	7265327	C	T	464.42	intergenic_region	MODIFIER	SIPA1L2-DISC1
-	4	7265603	G	A	592.2	intergenic_region	MODIFIER	SIPA1L2-DISC1
-	4	7265615	G	A	509.57	intergenic_region	MODIFIER	SIPA1L2-DISC1
-	4	7266132	C	T	1177.29	intergenic_region	MODIFIER	SIPA1L2-DISC1
-	4	7266645	T	C	5479.36	intergenic_region	MODIFIER	SIPA1L2-DISC1
-	4	7266928	T	A	5476.83	intergenic_region	MODIFIER	SIPA1L2-DISC1
-	4	7266965	T	A	11200.8	intergenic_region	MODIFIER	SIPA1L2-DISC1
-	4	7267054	G	A	867.24	intergenic_region	MODIFIER	SIPA1L2-DISC1
-	4	7267105	C	T	984.13	intergenic_region	MODIFIER	SIPA1L2-DISC1
-	4	7267123	G	A	7378.29	intergenic_region	MODIFIER	SIPA1L2-DISC1
-	4	7268396	C	T	5297	intergenic_region	MODIFIER	SIPA1L2-DISC1
-	4	7268588	A	G	5994.03	intergenic_region	MODIFIER	SIPA1L2-DISC1
-	4	7269299	G	T	884.66	intergenic_region	MODIFIER	SIPA1L2-DISC1
-	4	7269409	C	T	8263.53	intergenic_region	MODIFIER	SIPA1L2-DISC1
-	4	7269469	C	T	4063.97	intergenic_region	MODIFIER	SIPA1L2-DISC1
-	4	7269635	T	G	6244.46	intergenic_region	MODIFIER	SIPA1L2-DISC1
-	4	7269671	G	A	6227.6	intergenic_region	MODIFIER	SIPA1L2-DISC1
-	4	7269883	T	C	4693.15	intergenic_region	MODIFIER	SIPA1L2-DISC1
-	4	7270221	T	G	6627.72	intergenic_region	MODIFIER	SIPA1L2-DISC1
-	4	7270224	T	G	7968.53	intergenic_region	MODIFIER	SIPA1L2-DISC1
-	4	7270228	T	G	6335.07	intergenic_region	MODIFIER	SIPA1L2-DISC1
-	4	7270236	T	G	8028.9	intergenic_region	MODIFIER	SIPA1L2-DISC1
-	4	7270240	T	G	5862.71	intergenic_region	MODIFIER	SIPA1L2-DISC1
-	4	7270347	C	T	6713.51	intergenic_region	MODIFIER	SIPA1L2-DISC1
-	4	7270353	C	T	1129.6	intergenic_region	MODIFIER	SIPA1L2-DISC1
-	4	7270614	T	G	5818.42	intergenic_region	MODIFIER	SIPA1L2-DISC1
-	4	7270685	C	T	5522.26	intergenic_region	MODIFIER	SIPA1L2-DISC1
-	4	7270900	G	A	7244.1	intergenic_region	MODIFIER	SIPA1L2-DISC1
-	4	7270913	G	A	945.1	intergenic_region	MODIFIER	SIPA1L2-DISC1
-	4	7271076	C	T	8484.82	intergenic_region	MODIFIER	SIPA1L2-DISC1
-	4	7271385	C	A	8429.17	intergenic_region	MODIFIER	SIPA1L2-DISC1
-	4	7272165	C	A	6308.9	intergenic_region	MODIFIER	SIPA1L2-DISC1
-	4	7272190	A	C	6316.06	intergenic_region	MODIFIER	SIPA1L2-DISC1
-	4	7272246	T	G	5674.81	intergenic_region	MODIFIER	SIPA1L2-DISC1
-	4	7272366	G	C	5663.24	intergenic_region	MODIFIER	SIPA1L2-DISC1
-	4	7272397	G	A	5929.48	intergenic_region	MODIFIER	SIPA1L2-DISC1
-	4	7272622	T	A	4774	intergenic_region	MODIFIER	SIPA1L2-DISC1
-	4	7273056	G	A	7761.97	intergenic_region	MODIFIER	SIPA1L2-DISC1
-	4	7273179	G	A	813.23	intergenic_region	MODIFIER	SIPA1L2-DISC1
-	4	7273256	C	T	6562.63	intergenic_region	MODIFIER	SIPA1L2-DISC1
-	4	7273300	A	G	7620.77	intergenic_region	MODIFIER	SIPA1L2-DISC1
-	4	7273380	C	T	6060.21	intergenic_region	MODIFIER	SIPA1L2-DISC1
-	4	7273454	C	T	617.65	intergenic_region	MODIFIER	SIPA1L2-DISC1
-	4	7273501	A	G	6633.83	intergenic_region	MODIFIER	SIPA1L2-DISC1
-	4	7273846	G	A	4928.87	intergenic_region	MODIFIER	SIPA1L2-DISC1
-	4	7273946	C	T	1065.54	intergenic_region	MODIFIER	SIPA1L2-DISC1
-	4	7273992	A	G	6420.1	intergenic_region	MODIFIER	SIPA1L2-DISC1
-	4	7274050	C	T	5320.07	intergenic_region	MODIFIER	SIPA1L2-DISC1
-	4	7274191	A	C	7411.8	intergenic_region	MODIFIER	SIPA1L2-DISC1
-	4	7274284	G	A	5300.27	intergenic_region	MODIFIER	SIPA1L2-DISC1
-	4	7274548	G	A	7734.7	intergenic_region	MODIFIER	SIPA1L2-DISC1
-	4	7274566	G	A	8755.31	intergenic_region	MODIFIER	SIPA1L2-DISC1
-	4	7274742	A	C	670.64	intergenic_region	MODIFIER	SIPA1L2-DISC1
-	4	7274883	C	T	5707.42	intergenic_region	MODIFIER	SIPA1L2-DISC1
-	4	7275087	G	A	7828.65	intergenic_region	MODIFIER	SIPA1L2-DISC1
-	4	7275107	A	G	694.81	intergenic_region	MODIFIER	SIPA1L2-DISC1
-	4	7275668	G	C	5290.17	intergenic_region	MODIFIER	SIPA1L2-DISC1
-	4	7275733	G	C	1206.89	intergenic_region	MODIFIER	SIPA1L2-DISC1
-	4	7275959	T	A	5705.54	intergenic_region	MODIFIER	SIPA1L2-DISC1
-	4	7276194	G	A	6646.18	intergenic_region	MODIFIER	SIPA1L2-DISC1
-	4	7276313	A	G	5647.69	intergenic_region	MODIFIER	SIPA1L2-DISC1
-	4	7276364	G	T	8349.13	intergenic_region	MODIFIER	SIPA1L2-DISC1
-	4	7276369	G	A	981.6	intergenic_region	MODIFIER	SIPA1L2-DISC1
-	4	7276399	C	G	7628.79	intergenic_region	MODIFIER	SIPA1L2-DISC1
-	4	7276420	G	C	5860.62	intergenic_region	MODIFIER	SIPA1L2-DISC1
-	4	7276617	T	C	7920.5	intergenic_region	MODIFIER	SIPA1L2-DISC1
-	4	7276782	G	A	8885.89	intergenic_region	MODIFIER	SIPA1L2-DISC1
-	4	7276835	C	T	916.47	intergenic_region	MODIFIER	SIPA1L2-DISC1
-	4	7276949	C	T	8312.54	intergenic_region	MODIFIER	SIPA1L2-DISC1
-	4	7277317	G	T	5474.75	intergenic_region	MODIFIER	SIPA1L2-DISC1
-	4	7277320	A	G	3984.47	intergenic_region	MODIFIER	SIPA1L2-DISC1
-	4	7277658	A	C	8470.97	intergenic_region	MODIFIER	SIPA1L2-DISC1
-	4	7278339	G	A	5666.91	intergenic_region	MODIFIER	SIPA1L2-DISC1
-	4	7278570	G	A	4702.79	intergenic_region	MODIFIER	SIPA1L2-DISC1
-	4	7278657	A	G	882.21	intergenic_region	MODIFIER	SIPA1L2-DISC1
-	4	7278849	C	T	6157.09	intergenic_region	MODIFIER	SIPA1L2-DISC1
-	4	7278930	G	A	7256.21	intergenic_region	MODIFIER	SIPA1L2-DISC1
-	4	7279235	C	A	5886.12	intergenic_region	MODIFIER	SIPA1L2-DISC1
-	4	7279346	C	T	10564.1	intergenic_region	MODIFIER	SIPA1L2-DISC1
-	4	7279423	C	T	5152.12	intergenic_region	MODIFIER	SIPA1L2-DISC1
-	4	7279532	C	T	12070	intergenic_region	MODIFIER	SIPA1L2-DISC1
-	4	7279720	G	C	1288.61	intergenic_region	MODIFIER	SIPA1L2-DISC1
-	4	7279859	G	A	16738.2	intergenic_region	MODIFIER	SIPA1L2-DISC1
-	4	7280088	T	C	15899.1	intergenic_region	MODIFIER	SIPA1L2-DISC1
-	4	7280145	G	A	17861.4	intergenic_region	MODIFIER	SIPA1L2-DISC1
-	4	7280298	C	T	11323.2	intergenic_region	MODIFIER	SIPA1L2-DISC1
-	4	7280366	T	C	601.27	intergenic_region	MODIFIER	SIPA1L2-DISC1
-	4	7280375	T	C	577.95	intergenic_region	MODIFIER	SIPA1L2-DISC1
-	4	7280426	A	C	10037.3	intergenic_region	MODIFIER	SIPA1L2-DISC1
-	4	7280428	C	T	797.64	intergenic_region	MODIFIER	SIPA1L2-DISC1
-	4	7280505	A	G	16707.6	intergenic_region	MODIFIER	SIPA1L2-DISC1
-	4	7280561	A	C	12025.6	intergenic_region	MODIFIER	SIPA1L2-DISC1
-	4	7280577	G	T	762.97	intergenic_region	MODIFIER	SIPA1L2-DISC1
-	4	7280648	G	A	462.39	intergenic_region	MODIFIER	SIPA1L2-DISC1
-	4	7280816	T	A	10612.3	intergenic_region	MODIFIER	SIPA1L2-DISC1
[truncated: 15,669 more rows]
[truncated: 19 more columns]

## Sheet: Table S5
Table S5. The top 0.1% of outlier loci for delta pi between cases and both control populations (SCA and SCLE)
TFBS	CHROM_#	Position	Bin_start	Bin_end	Putative_impact	Annotation	Gene_name(ortholog)	Putative_function
-	4	5382219	5337001	5427000	MODERATE	missense_variant	TARBP1	RNA binding and RNA methyltransferase activity
-	4	5407342	5358001	5427000	MODERATE	missense_variant	TARBP1	RNA binding and RNA methyltransferase activity
TFBS	4	6705047	6700001	6755000	MODERATE	missense_variant	ENSCAFG00000011612 (NTPCR)	nucleoside-triphosphatase, cancer-related
-	8	2496720	2474001	2542000	MODERATE	missense_variant	TRAV21	V region of the variable domain of T cell receptor (TR) alpha chain that participates in the antigen recognition
-	8	34755349	34738001	34799000	MODERATE	missense_variant	CCDC175	Uncharacterized function
-	16	6945885	620001	681000	HIGH	start_lost	TRBV3-1	V region of the variable domain of T cell receptor (TR) beta chain that participates in the antigen recognition
-	16	6900739	6885001	6950000	MODERATE	missense_variant	ENSCAFG00000003812 (TRBV13)	V region of the variable domain of T cell receptor (TR) beta chain that participates in the antigen recognition
-	16	6900898	6885001	6950000	MODERATE	missense_variant	ENSCAFG00000003812 (TRBV13)	V region of the variable domain of T cell receptor (TR) beta chain that participates in the antigen recognition
-	16	6944443	6895001	6963000	MODERATE	missense_variant	ENSCAFG00000030524 (TRBV4-2)	V region of the variable domain of T cell receptor (TR) beta chain that participates in the antigen recognition
-	16	6945648	6896001	6963000	MODERATE	missense_variant	ENSCAFG00000030524 (TRBV4-2)	V region of the variable domain of T cell receptor (TR) beta chain that participates in the antigen recognition
-	16	6945875	6896001	6963000	MODERATE	missense_variant	ENSCAFG00000030524 (TRBV4-2)	V region of the variable domain of T cell receptor (TR) beta chain that participates in the antigen recognition
-	16	6949242	6900001	6963000	MODERATE	missense_variant	TRBV3-1	V region of the variable domain of T cell receptor (TR) beta chain that participates in the antigen recognition
-	16	6949347	6900001	6963000	MODERATE	missense_variant	TRBV3-1	V region of the variable domain of T cell receptor (TR) beta chain that participates in the antigen recognition
-	18	11757556	11744001	11807000	MODERATE	missense_variant	STARD3NL	binds cholesterol molecules and may play a role in endosomal cholesterol transport
-	21	27507872	27490001	27558000	MODERATE	missense_variant	ENSCAFG00000031799 (OR52J3)	olfactory receptor protein
-	21	27539941	27490001	27572000	MODERATE	missense_variant	OR52E2	olfactory receptor protein
-	21	27539954	27490001	27572000	MODERATE	missense_variant	OR52E2	olfactory receptor protein
-	21	27540166	27491001	27572000	MODERATE	missense_variant	OR52E2	olfactory receptor protein
-	21	27571379	27522001	27619000	MODERATE	missense_variant	ENSCAFG00000029703 (OR52E2)	olfactory receptor protein
-	21	27614512	27565001	27619000	MODERATE	missense_variant	ENSCAFG00000025564 (OR52R1)	olfactory receptor protein
-	21	27614591	27565001	27619000	MODERATE	missense_variant	ENSCAFG00000025564 (OR52R1)	olfactory receptor protein
-	21	27846473	27824001	27891000	MODERATE	missense_variant	ENSCAFG00000012321 (Olfr609)	olfactory receptor protein
-	21	27855891	27824001	27891000	MODERATE	missense_variant	ENSCAFG00000024022 (Olfr610)	olfactory receptor protein
-	21	28281555	28279001	28330000	MODERATE	missense_variant	OR51B6	olfactory receptor protein
-	21	28281699	28279001	28330000	MODERATE	missense_variant	OR51B6	olfactory receptor protein
-	21	28362320	28337001	28390000	MODERATE	missense_variant	OR51Q1	olfactory receptor protein
-	21	28362468	28337001	28390000	MODERATE	missense_variant	OR51Q1	olfactory receptor protein
-	21	28362896	28337001	28390000	MODERATE	missense_variant	OR51Q1	olfactory receptor protein
-	23	27521535	27481001	27560000	MODERATE	missense_variant	ENSCAFG00000024259 (Col6a4)	cell-binding protein
-	25	32112720	32072001	32123000	MODERATE	missense_variant	DOCK5	regulation of intestinal epithelial cell spreading and migration on collagen IV
-	25	45379280	45351001	45429000	MODERATE	missense_variant	SPP2	endopeptidase inhibitor activity and cysteine-type endopeptidase inhibitor activity
-	25	45385328	45351001	45435000	MODERATE	missense_variant	SPP2	endopeptidase inhibitor activity and cysteine-type endopeptidase inhibitor activity
-	25	45386146	45351001	45436000	MODERATE	missense_variant	SPP2	endopeptidase inhibitor activity and cysteine-type endopeptidase inhibitor activity
-	26	34571069	34562001	34621000	MODERATE	missense_variant	PCDH15	calcium-dependent cell-cell adhesion; maintenance of normal retinal and cochlear function; hearing loss and Usher Syndrome Type IF
-	26	34571630	34562001	34621000	MODERATE	missense_variant	PCDH15	calcium-dependent cell-cell adhesion; maintenance of normal retinal and cochlear function; hearing loss and Usher Syndrome Type IF
-	28	39453901	39404001	39461000	MODERATE	missense_variant	TCERG1L	RNA polymerase II repressing transcription factor binding
-	28	40582200	40579001	40632000	MODERATE	missense_variant	CFAP46	cilium movement
-	28	40587027	40579001	40637000	MODERATE	missense_variant	CFAP46	cilium movement
-	28	40593740	40579001	40643000	MODERATE	missense_variant	CFAP46	cilium movement
-	28	40593766	40579001	40666000	MODERATE	missense_variant	CFAP46	cilium movement
-	28	40626144	40579001	40676000	MODERATE	missense_variant	CFAP46	cilium movement
-	28	40646035	40597001	40678000	MODERATE	missense_variant	CFAP46	cilium movement
-	28	40655600	40606001	40678000	MODERATE	missense_variant	CFAP46	cilium movement
-	28	40657361	40608001	40678000	MODERATE	missense_variant	CFAP46	cilium movement
-	28	40671212	40622001	40678000	MODERATE	missense_variant	CFAP46	cilium movement
-	32	15203073	15154001	15207000	MODERATE	missense_variant	ENSCAFG00000009965 (CCNB1)	regulatory protein involved in mitosis; associated with Thyroid Lymphoma and Adrenal Carcinoma
-	32	15203113	15154001	15207000	MODERATE	missense_variant	ENSCAFG00000009965 (CCNB1)	regulatory protein involved in mitosis; associated with Thyroid Lymphoma and Adrenal Carcinoma
-	32	15203173	15154001	15207000	MODERATE	missense_variant	ENSCAFG00000009965 (CCNB1)	regulatory protein involved in mitosis; associated with Thyroid Lymphoma and Adrenal Carcinoma
-	32	15203194	15154001	15207000	MODERATE	missense_variant	ENSCAFG00000009965 (CCNB1)	regulatory protein involved in mitosis; associated with Thyroid Lymphoma and Adrenal Carcinoma
-	32	15203327	15154001	15207000	MODERATE	missense_variant	ENSCAFG00000009965 (CCNB1)	regulatory protein involved in mitosis; associated with Thyroid Lymphoma and Adrenal Carcinoma
-	32	15203416	15154001	15207000	MODERATE	missense_variant	ENSCAFG00000009965 (CCNB1)	regulatory protein involved in mitosis; associated with Thyroid Lymphoma and Adrenal Carcinoma
-	32	15203427	15154001	15207000	MODERATE	missense_variant	ENSCAFG00000009965 (CCNB1)	regulatory protein involved in mitosis; associated with Thyroid Lymphoma and Adrenal Carcinoma
-	32	15203790	15154001	15207000	MODERATE	missense_variant	ENSCAFG00000009965 (CCNB1)	regulatory protein involved in mitosis; associated with Thyroid Lymphoma and Adrenal Carcinoma
-	33	282099	260001	332000	MODERATE	missense_variant	ENSCAFG00000025407 (CSNKA2IP)	chromatin regulation of male germ cells
-	33	282168	260001	332000	MODERATE	missense_variant	ENSCAFG00000025407 (CSNKA2IP)	chromatin regulation of male germ cells
-	33	282210	260001	332000	MODERATE	missense_variant	ENSCAFG00000025407 (CSNKA2IP)	chromatin regulation of male germ cells
-	33	282237	260001	332000	MODERATE	missense_variant	ENSCAFG00000025407 (CSNKA2IP)	chromatin regulation of male germ cells
-	33	282279	260001	332000	MODERATE	missense_variant	ENSCAFG00000025407 (CSNKA2IP)	chromatin regulation of male germ cells
-	33	282337	260001	332000	MODERATE	missense_variant	ENSCAFG00000025407 (CSNKA2IP)	chromatin regulation of male germ cells
-	33	282435	260001	332000	MODERATE	missense_variant	ENSCAFG00000025407 (CSNKA2IP)	chromatin regulation of male germ cells
-	33	282546	260001	332000	MODERATE	missense_variant	ENSCAFG00000025407 (CSNKA2IP)	chromatin regulation of male germ cells
-	33	282598	260001	332000	MODERATE	missense_variant	ENSCAFG00000025407 (CSNKA2IP)	chromatin regulation of male germ cells
-	33	282676	260001	332000	MODERATE	missense_variant	ENSCAFG00000025407 (CSNKA2IP)	chromatin regulation of male germ cells
-	33	282700	260001	332000	MODERATE	missense_variant	ENSCAFG00000025407 (CSNKA2IP)	chromatin regulation of male germ cells
-	33	282706	260001	332000	MODERATE	missense_variant	ENSCAFG00000025407 (CSNKA2IP)	chromatin regulation of male germ cells
-	33	282731	260001	332000	MODERATE	missense_variant	ENSCAFG00000025407 (CSNKA2IP)	chromatin regulation of male germ cells
-	34	36044827	36019001	36076000	MODERATE	missense_variant	PLD1	signal transduction and subcellular trafficking
-	35	25490111	25481001	25537000	MODERATE	missense_variant	ENSCAFG00000024969	Uncharacterized function
-	35	25527520	25481001	25547000	MODERATE	missense_variant	ZSCAN12	DNA binding transcription factor activity
-	35	25533128	25484001	25547000	MODERATE	missense_variant	ZSCAN12	DNA binding transcription factor activity
-	35	25533162	25484001	25547000	MODERATE	missense_variant	ZSCAN12	DNA binding transcription factor activity
-	35	25533210	25484001	25547000	MODERATE	missense_variant	ZSCAN12	DNA binding transcription factor activity
-	35	25533343	25484001	25547000	MODERATE	missense_variant	ZSCAN12	DNA binding transcription factor activity

## Sheet: Table S6
Table S6. Candidate genes identified from SNPs within 16 candidate regions with an allele frequency difference above 0.45 (n = 38). (*) designates significant GO genes
CHROM_#	Gene_start	Gene_end	Gene_name	Gene_ID(Ortholog)	Putative_function	#_annotation
7	73815576	74597564	Protein Tyrosine Phosphatase, Receptor Type M	PTPRM	role in signal transduction, growth control, and oncogenic transformation; cell-cell aggregation & adhesion	2 intronic
8	34686245	34700199	Trans-L-3-Hydroxyproline Dehydratase	L3HYPDH	degrade dietary proteins	1 upstream
8	34725466	34792685	Coiled-Coil Domain Containing 175æ	CCDC175		1 intronic
8	34810342	35033387	Reticulon 1	RTN1	neuroendocrine secretion or in membrane trafficking in neuroendocrine cells; marker for neurological diseases and cancer	1 downstream
14	21807022	21808512	Keratin 8	ENSCAFG00000002184 (KRT8)	maintaining cellular structural integrity; signal transduction and cellular differentiation	1 intergenic
14	22026498	22026678	unknown	ENSCAFG00000030255	RF01887 (lncRNA DLX6 antisense RNA 1 (DLX6-AS1))	-
19	5167424	5262738	unknown	ENSCAFG00000039008	lincRNA	1 intronic
20	36597454	36657503	Decapping MRNA 1A	*DCP1A	degradation of normal mRNA turnover and nonsense-mediated mRNA; TGF-beta signaling pathway	2 intronic
20	36724062	36749485	Protein Kinase C Delta	PRKCD	tumor suppressor; positive regulator of cell cycle progression; positively or negatively regulate apoptosis	1 intergenic
20	36781858	36818854	Requiring Fifty Three 1 Homolog	RFT1	N-linked oligosaccharide assembly	-
38	22250764	22269238	Cilia And Flagella Associated Protein 45 (Coiled-Coil Domain Containing 19)	CFAP45 (CCDC19)	associated with Pharynx Cancer and Nasopharyngeal Carcinoma	1 intergenic
38	22281625	22285509	V-Set And Immunoglobulin Domain Containing 8	VSIG8		-
38	22300140	22307357	SLAM Family Member 8	ENSCAFG00000011795 (SLAMF8)	lymphocyte activation	2 upstream
38	22312491	22320700	Fc Receptor Like 6	FCRL6	protein phosphatase binding; associated with Viral Pneumonia and Dental Fluorosis	2 intronic; 1 intergenic
38	22344722	22344910	Dual Specificity Phosphatase 23	ENSCAFG00000031934 (DUSP23)	tyrosine/serine/threonine phosphatase activity; associated with Neuronal Intestinal Dysplasia	1 downstream; 2 intergenic
38	22396604	22399244	C-Reactive Protein	*CRP	recognize and initiate their elimination of foreign pathogens and damaged cells	6 downstream
38	22456044	22457102	unknown	ENSCAFG00000039447	lincRNA	3 downstream

## Sheet: Table S7
Table S7. Inbreeding coefficients calculated in 'detectRuns', which estimates F(ROH) as the proportion of ROH to total number of loci across the genome.
Sample_ID	Status	Total # of ROH	Sum of bp in ROH	F(ROH)		Status	Average # of ROH	Stdev	Average F(ROH)	Stdev			Df	Sum Sq	Mean Sq	F value	Pr(>F)
12A20	case	1586	667991211	0.303163		case	1682.58	699.733	0.319775	0.115914		Group	2	1459122	729561	1.1914	0.3182
36966	case	90	83157560	0.0377404		SCA control	1997.18	157.184	0.368244	0.0210523		Residuals	29	17758233	612353
46F10	case	1818	761179387	0.345455		SCLE control	1461.89	1231.12	0.276457	0.192913
74A72	case	1819	753340597	0.341898
83E0C	case	2119	872384237	0.395925
94065	case	1906	794023852	0.360362
E2F58	case	537	331820929	0.150594
E5B17	case	1870	785358381	0.356429
B35G	case	1760	734816196	0.333491
7002E	case	2107	838816642	0.38069
64D1B	case	2672	1047276801	0.475298
25519	case	1907	784979413	0.356257
01A24	control	1943	805198758	0.365433
2770E	control	1751	741738457	0.336632
4581F	control	1880	786046606	0.356741
5317D	control	2111	826548134	0.375122
53E3E	control	2066	846358848	0.384113
70616	control	1745	730895423	0.331711
93369	control	2210	888304705	0.40315
E3B7A	control	1966	801499092	0.363754
E6A0A	control	2035	817478917	0.371006
76D4D	control	2081	828492551	0.376005
16042	control	2181	852745169	0.387012
13580	SCLE	157	108027652	0.0490275
13601	SCLE	247	150608118	0.0683523
13615	SCLE	539	312245667	0.14171
13679	SCLE	3282	1227963205	0.557302
13685	SCLE	1486	674528561	0.30613
13701	SCLE	860	423618268	0.192256
13716	SCLE	852	438136079	0.198845
RKW13704	SCLE	3089	1156055528	0.524667
SCLV4F	SCLE	2645	991156244	0.449829

## Sheet: Table S8
Table S8. allele frequency between cases and SCA controls at SNV within the MHC region
TFBS	CHROM #	Position	delta_pi	absolute_delta_pi	FST	Putative_impact	Annotation	Gene(s)
-	chr12	2138135	-0.026515	0.026515	-0.0349	MODIFIER	downstream_gene_variant	DLA_DRA
-	chr12	2138339	0.090909	0.090909	0.0558	MODIFIER	downstream_gene_variant	DLA_DRA
-	chr12	2138383	0.068182	0.068182	-0.0372	MODIFIER	downstream_gene_variant	DLA_DRA
-	chr12	2138384	-0.189394	0.189394	0.0313	MODIFIER	downstream_gene_variant	DLA_DRA
-	chr12	2138481	-0.071969	0.071969	-0.0216	MODIFIER	downstream_gene_variant	DLA_DRA
-	chr12	2138551	-0.01894	0.01894	-0.0382	MODIFIER	downstream_gene_variant	DLA_DRA
-	chr12	2138918	0.090909	0.090909	0.0558	MODIFIER	downstream_gene_variant	DLA_DRA
-	chr12	2139121	0.022727	0.022727	-0.0402	MODIFIER	downstream_gene_variant	DLA_DRA
-	chr12	2139471	-0.01894	0.01894	-0.0382	MODIFIER	downstream_gene_variant	DLA_DRA
-	chr12	2139799	0.01894	0.01894	-0.0382	MODIFIER	downstream_gene_variant	DLA_DRA
-	chr12	2140082	-0.01894	0.01894	-0.0382	MODIFIER	downstream_gene_variant	DLA_DRA
-	chr12	2141119	-0.077273	0.077273	-0.026	MODIFIER	downstream_gene_variant	DLA_DRA
-	chr12	2141248	-0.01894	0.01894	-0.0382	MODIFIER	downstream_gene_variant	DLA_DRA
-	chr12	2141431	-0.071969	0.071969	-0.031	MODIFIER	downstream_gene_variant	DLA_DRA
-	chr12	2141474	0.071969	0.071969	-0.0216	MODIFIER	downstream_gene_variant	DLA_DRA
-	chr12	2141517	-0.01894	0.01894	-0.0382	MODIFIER	downstream_gene_variant	DLA_DRA
-	chr12	2141645	-0.01894	0.01894	-0.0382	MODIFIER	downstream_gene_variant	DLA_DRA
-	chr12	2141746	-0.071969	0.071969	-0.0216	MODIFIER	intergenic_region	DLA_DRA-HLA-DRB1
-	chr12	2141824	0.090909	0.090909	0.0558	MODIFIER	intergenic_region	DLA_DRA-HLA-DRB1
-	chr12	2141840	0.090909	0.090909	0.0558	MODIFIER	intergenic_region	DLA_DRA-HLA-DRB1
-	chr12	2141854	-0.030303	0.030303	-0.0384	MODIFIER	intergenic_region	DLA_DRA-HLA-DRB1
-	chr12	2141895	0.026515	0.026515	-0.0544	MODIFIER	intergenic_region	DLA_DRA-HLA-DRB1
-	chr12	2142008	0.117424	0.117424	-0.0176	MODIFIER	intergenic_region	DLA_DRA-HLA-DRB1
-	chr12	2142277	0.122727	0.122727	-0.005	MODIFIER	intergenic_region	DLA_DRA-HLA-DRB1
-	chr12	2142530	0.015151	0.015151	-0.0524	MODIFIER	intergenic_region	DLA_DRA-HLA-DRB1
-	chr12	2142915	0.090909	0.090909	0.0558	MODIFIER	intergenic_region	DLA_DRA-HLA-DRB1
-	chr12	2142993	0.189394	0.189394	0.0741	MODIFIER	intergenic_region	DLA_DRA-HLA-DRB1
-	chr12	2143155	-0.071969	0.071969	-0.0216	MODIFIER	intergenic_region	DLA_DRA-HLA-DRB1
-	chr12	2143237	0.090909	0.090909	0.0558	MODIFIER	intergenic_region	DLA_DRA-HLA-DRB1
-	chr12	2143865	-0.109849	0.109849	-0.0204	MODIFIER	intergenic_region	DLA_DRA-HLA-DRB1
-	chr12	2144035	-0.05	0.05	-0.041	MODIFIER	intergenic_region	DLA_DRA-HLA-DRB1
-	chr12	2144291	-0.060606	0.060606	-0.0372	MODIFIER	intergenic_region	DLA_DRA-HLA-DRB1
-	chr12	2144369	0.090909	0.090909	0.0558	MODIFIER	intergenic_region	DLA_DRA-HLA-DRB1
-	chr12	2146385	-0.0909091	0.0909091	0.0558	MODIFIER	intergenic_region	DLA_DRA-HLA-DRB1
-	chr12	2146820	0.090909	0.090909	0.0558	MODIFIER	downstream_gene_variant	HLA-DRB1
-	chr12	2147039	-0.0909091	0.0909091	0.0558	MODIFIER	downstream_gene_variant	HLA-DRB1
-	chr12	2147226	-0.0909091	0.0909091	0.0558	MODIFIER	downstream_gene_variant	HLA-DRB1
-	chr12	2147246	0.090909	0.090909	0.0558	MODIFIER	downstream_gene_variant	HLA-DRB1
-	chr12	2147316	-0.136364	0.136364	0.0667	MODIFIER	downstream_gene_variant	HLA-DRB1
-	chr12	2147536	-0.136364	0.136364	0.0756	MODIFIER	downstream_gene_variant	HLA-DRB1
-	chr12	2147902	-0.0454545	0.0454545	0.0041	MODIFIER	downstream_gene_variant	HLA-DRB1
-	chr12	2148702	-0.01894	0.01894	-0.0382	MODIFIER	downstream_gene_variant	HLA-DRB1
-	chr12	2149329	-0.071969	0.071969	-0.0216	MODIFIER	downstream_gene_variant	HLA-DRB1
-	chr12	2150247	0.090909	0.090909	0.0558	MODIFIER	downstream_gene_variant	HLA-DRB1
-	chr12	2150547	-0.0909091	0.0909091	0.0558	MODIFIER	downstream_gene_variant	HLA-DRB1
-	chr12	2151197	0.090909	0.090909	0.0558	MODIFIER	downstream_gene_variant	HLA-DRB1
-	chr12	2151795	0.090909	0.090909	0.0558	MODIFIER	intron_variant	HLA-DRB1
-	chr12	2152047	-0.060606	0.060606	-0.0372	MODIFIER	intron_variant	HLA-DRB1
-	chr12	2152115	0.136364	0.136364	0.0756	MODIFIER	intron_variant	HLA-DRB1
-	chr12	2152143	0.136364	0.136364	0.0756	MODIFIER	intron_variant	HLA-DRB1
-	chr12	2152472	0.090909	0.090909	0.0558	MODIFIER	intron_variant	HLA-DRB1
-	chr12	2152695	0.05	0.05	0.0096	MODIFIER	intron_variant	HLA-DRB1
-	chr12	2152873	0.125	0.125	0.0219	MODIFIER	intron_variant	HLA-DRB1
-	chr12	2153043	-0.0909091	0.0909091	0.0558	MODIFIER	intron_variant	HLA-DRB1
-	chr12	2153217	0.090909	0.090909	0.0558	MODIFIER	intron_variant	HLA-DRB1
-	chr12	2153502	0.136364	0.136364	0.0756	MODIFIER	intron_variant	HLA-DRB1
-	chr12	2154266	-0.0909091	0.0909091	0.0558	MODIFIER	intron_variant	HLA-DRB1
-	chr12	2154285	0.090909	0.090909	0.0558	MODIFIER	intron_variant	HLA-DRB1
-	chr12	2155519	-0.0909091	0.0909091	0.0558	MODIFIER	intron_variant	HLA-DRB1
-	chr12	2157104	-0.172222	0.172222	0.0028	MODERATE	missense_variant	HLA-DRB1
-	chr12	2157105	-0.172222	0.172222	0.0028	MODERATE	missense_variant	HLA-DRB1
-	chr12	2157115	0.147727	0.147727	-0.0029	LOW	synonymous_variant	HLA-DRB1
-	chr12	2157116	0.147727	0.147727	-0.0029	MODERATE	missense_variant	HLA-DRB1
-	chr12	2157117	0.147727	0.147727	-0.0029	MODERATE	missense_variant	HLA-DRB1
-	chr12	2157161	-0.166667	0.166667	0.0964	MODERATE	missense_variant	HLA-DRB1
-	chr12	2157174	0.05	0.05	0.0096	MODERATE	missense_variant	HLA-DRB1
-	chr12	2157185	-0.010101	0.010101	-0.0554	MODERATE	missense_variant	HLA-DRB1
-	chr12	2157194	-0.038889	0.038889	-0.0344	MODERATE	missense_variant	HLA-DRB1
-	chr12	2157199	0.056818	0.056818	-0.0419	LOW	synonymous_variant	HLA-DRB1
-	chr12	2157261	-0.25	0.25	0.218	MODERATE	missense_variant	HLA-DRB1
-	chr12	2157263	0.15	0.15	0	MODERATE	missense_variant	HLA-DRB1
-	chr12	2157279	-0.121212	0.121212	0.0155	MODERATE	missense_variant	HLA-DRB1
-	chr12	2157284	0.1	0.1	-0.0256	MODERATE	missense_variant	HLA-DRB1
-	chr12	2158171	0.076389	0.076389	-0.0302	MODIFIER	intron_variant	HLA-DRB1
-	chr12	2158405	-0.064394	0.064394	-0.0302	MODIFIER	intron_variant	HLA-DRB1
-	chr12	2158624	-0.026515	0.026515	-0.0447	MODIFIER	intron_variant	HLA-DRB1
-	chr12	2158814	0.022727	0.022727	-0.0402	MODIFIER	intron_variant	HLA-DRB1
-	chr12	2158890	-0.01894	0.01894	-0.0382	MODIFIER	intron_variant	HLA-DRB1
-	chr12	2158989	-0.01894	0.01894	-0.0382	MODIFIER	intron_variant	HLA-DRB1
-	chr12	2159103	-0.01894	0.01894	-0.0382	MODIFIER	intron_variant	HLA-DRB1
-	chr12	2159479	-0.162878	0.162878	0.0128	MODIFIER	intron_variant	HLA-DRB1
-	chr12	2159572	-0.071969	0.071969	-0.0216	MODIFIER	intron_variant	HLA-DRB1
-	chr12	2159882	0.071969	0.071969	-0.0216	MODIFIER	intron_variant	HLA-DRB1
-	chr12	2160016	0.090909	0.090909	0.0558	MODIFIER	intron_variant	HLA-DRB1
-	chr12	2160208	0.036364	0.036364	-0.0705	MODIFIER	intron_variant	HLA-DRB1
-	chr12	2160212	0.080808	0.080808	-0.0624	MODIFIER	intron_variant	HLA-DRB1
-	chr12	2160217	0.080808	0.080808	-0.0624	MODIFIER	intron_variant	HLA-DRB1
-	chr12	2160831	-0.045454	0.045454	-0.0275	MODIFIER	intron_variant	HLA-DRB1
-	chr12	2160834	-0.01894	0.01894	-0.0382	MODIFIER	intron_variant	HLA-DRB1
-	chr12	2161155	0.090909	0.090909	0.0558	MODIFIER	intron_variant	HLA-DRB1
-	chr12	2161380	0.090909	0.090909	0.0558	MODIFIER	intron_variant	HLA-DRB1
-	chr12	2162077	0.090909	0.090909	0.0296	MODIFIER	intron_variant	HLA-DRB1
-	chr12	2162387	-0.01894	0.01894	-0.0382	MODIFIER	intron_variant	HLA-DRB1
-	chr12	2162410	-0.075758	0.075758	-0.0333	MODIFIER	intron_variant	HLA-DRB1
-	chr12	2162470	0.003788	0.003788	-0.0661	MODIFIER	intron_variant	HLA-DRB1
-	chr12	2163156	0	0	#NAME?	MODIFIER	intron_variant	HLA-DRB1
-	chr12	2163763	-0.01894	0.01894	-0.0484	MODIFIER	intron_variant	HLA-DRB1
-	chr12	2163935	-0.01894	0.01894	-0.0382	MODIFIER	intron_variant	HLA-DRB1
-	chr12	2164176	-0.01894	0.01894	-0.0382	MODIFIER	intron_variant	HLA-DRB1
-	chr12	2164404	0.090909	0.090909	0.0558	MODIFIER	intron_variant	HLA-DRB1
-	chr12	2164484	-0.026515	0.026515	-0.0447	LOW	synonymous_variant	HLA-DRB1
-	chr12	2165085	-0.064394	0.064394	-0.0302	MODIFIER	upstream_gene_variant	HLA-DRB1
-	chr12	2165099	-0.045454	0.045454	-0.0396	MODIFIER	upstream_gene_variant	HLA-DRB1
-	chr12	2167442	0.022727	0.022727	-0.051	MODIFIER	upstream_gene_variant	HLA-DRB1
-	chr12	2167714	0.189394	0.189394	0.0741	MODIFIER	upstream_gene_variant	HLA-DRB1
-	chr12	2168203	-0.030303	0.030303	-0.0384	MODIFIER	upstream_gene_variant	HLA-DRB1
-	chr12	2168216	-0.090909	0.090909	-0.0274	MODIFIER	upstream_gene_variant	HLA-DRB1
-	chr12	2168217	-0.030303	0.030303	-0.0384	MODIFIER	upstream_gene_variant	HLA-DRB1
-	chr12	2168966	0.136364	0.136364	0.0756	MODIFIER	upstream_gene_variant	HLA-DRB1
-	chr12	2169172	-0.131313	0.131313	0.0031	MODIFIER	upstream_gene_variant	HLA-DRB1
-	chr12	2169791	0.090909	0.090909	0.0558	MODIFIER	intergenic_region	HLA-DRB1-DLA-DQA1
-	chr12	2169821	-0.060606	0.060606	-0.0274	MODIFIER	intergenic_region	HLA-DRB1-DLA-DQA1
-	chr12	2170700	-0.022727	0.022727	-0.0426	MODIFIER	intergenic_region	HLA-DRB1-DLA-DQA1
-	chr12	2170732	0.022727	0.022727	-0.0402	MODIFIER	intergenic_region	HLA-DRB1-DLA-DQA1
-	chr12	2171340	-0.113636	0.113636	-0.0046	MODIFIER	intergenic_region	HLA-DRB1-DLA-DQA1
-	chr12	2171549	-0.026515	0.026515	-0.0447	MODIFIER	intergenic_region	HLA-DRB1-DLA-DQA1
-	chr12	2171928	0.026515	0.026515	-0.0447	MODIFIER	intergenic_region	HLA-DRB1-DLA-DQA1
-	chr12	2172248	0.090909	0.090909	0.0558	MODIFIER	intergenic_region	HLA-DRB1-DLA-DQA1
-	chr12	2172658	-0.026515	0.026515	-0.0447	MODIFIER	intergenic_region	HLA-DRB1-DLA-DQA1
-	chr12	2172672	-0.090909	0.090909	-0.0233	MODIFIER	intergenic_region	HLA-DRB1-DLA-DQA1
-	chr12	2172814	0.01894	0.01894	-0.0382	MODIFIER	intergenic_region	HLA-DRB1-DLA-DQA1
-	chr12	2172914	-0.01894	0.01894	-0.0382	MODIFIER	intergenic_region	HLA-DRB1-DLA-DQA1
-	chr12	2173279	-0.022727	0.022727	-0.0402	MODIFIER	intergenic_region	HLA-DRB1-DLA-DQA1
-	chr12	2173388	0.01894	0.01894	-0.0382	MODIFIER	intergenic_region	HLA-DRB1-DLA-DQA1
-	chr12	2173852	0.136363	0.136363	-0.0039	MODIFIER	intergenic_region	HLA-DRB1-DLA-DQA1
-	chr12	2174015	0.060606	0.060606	-0.0372	MODIFIER	intergenic_region	HLA-DRB1-DLA-DQA1
-	chr12	2174192	0.026515	0.026515	-0.0447	MODIFIER	intergenic_region	HLA-DRB1-DLA-DQA1
-	chr12	2174298	-0.064394	0.064394	-0.0302	MODIFIER	intergenic_region	HLA-DRB1-DLA-DQA1
-	chr12	2174336	-0.064394	0.064394	-0.0302	MODIFIER	intergenic_region	HLA-DRB1-DLA-DQA1
-	chr12	2174343	-0.064394	0.064394	-0.0302	MODIFIER	intergenic_region	HLA-DRB1-DLA-DQA1
-	chr12	2174362	0.064394	0.064394	-0.0302	MODIFIER	intergenic_region	HLA-DRB1-DLA-DQA1
-	chr12	2174426	-0.136363	0.136363	-0.0039	MODIFIER	intergenic_region	HLA-DRB1-DLA-DQA1
-	chr12	2174440	-0.033333	0.033333	-0.0558	MODIFIER	intergenic_region	HLA-DRB1-DLA-DQA1
-	chr12	2174462	-0.071969	0.071969	-0.0404	MODIFIER	intergenic_region	HLA-DRB1-DLA-DQA1
-	chr12	2174538	0.026515	0.026515	-0.0447	MODIFIER	intergenic_region	HLA-DRB1-DLA-DQA1
-	chr12	2174686	-0.015151	0.015151	-0.0524	MODIFIER	intergenic_region	HLA-DRB1-DLA-DQA1
-	chr12	2174800	-0.136363	0.136363	-0.0154	MODIFIER	intergenic_region	HLA-DRB1-DLA-DQA1
-	chr12	2175976	0.064394	0.064394	-0.0433	MODIFIER	intergenic_region	HLA-DRB1-DLA-DQA1
-	chr12	2176312	0.045455	0.045455	-0.0617	MODIFIER	intergenic_region	HLA-DRB1-DLA-DQA1
-	chr12	2176391	0.090909	0.090909	-0.0274	MODIFIER	intergenic_region	HLA-DRB1-DLA-DQA1
-	chr12	2176485	-0.01894	0.01894	-0.0382	MODIFIER	intergenic_region	HLA-DRB1-DLA-DQA1
-	chr12	2176593	0	0	-0.0476	MODIFIER	intergenic_region	HLA-DRB1-DLA-DQA1
-	chr12	2176617	-0.041667	0.041667	-0.0384	MODIFIER	intergenic_region	HLA-DRB1-DLA-DQA1
-	chr12	2176740	0	0	-0.0581	MODIFIER	intergenic_region	HLA-DRB1-DLA-DQA1
-	chr12	2176756	0.056818	0.056818	-0.0512	MODIFIER	intergenic_region	HLA-DRB1-DLA-DQA1
-	chr12	2176837	0.060606	0.060606	-0.0372	MODIFIER	intergenic_region	HLA-DRB1-DLA-DQA1
-	chr12	2176842	0.090909	0.090909	0.0558	MODIFIER	intergenic_region	HLA-DRB1-DLA-DQA1
-	chr12	2177183	-0.01894	0.01894	-0.0382	MODIFIER	intergenic_region	HLA-DRB1-DLA-DQA1
-	chr12	2177433	-0.01894	0.01894	-0.0382	MODIFIER	intergenic_region	HLA-DRB1-DLA-DQA1
-	chr12	2177458	-0.060606	0.060606	-0.0372	MODIFIER	intergenic_region	HLA-DRB1-DLA-DQA1
-	chr12	2177475	0.045455	0.045455	0.0041	MODIFIER	intergenic_region	HLA-DRB1-DLA-DQA1
-	chr12	2178413	0.238636	0.238636	0.0794	MODIFIER	intergenic_region	HLA-DRB1-DLA-DQA1
-	chr12	2178426	-0.238636	0.238636	0.0794	MODIFIER	intergenic_region	HLA-DRB1-DLA-DQA1
-	chr12	2178783	-0.083333	0.083333	-0.0962	MODIFIER	intergenic_region	HLA-DRB1-DLA-DQA1
-	chr12	2179324	0.276515	0.276515	0.1873	MODIFIER	intergenic_region	HLA-DRB1-DLA-DQA1
-	chr12	2179415	-0.266667	0.266667	0.135	MODIFIER	intergenic_region	HLA-DRB1-DLA-DQA1
-	chr12	2179476	0.234849	0.234849	0.1113	MODIFIER	intergenic_region	HLA-DRB1-DLA-DQA1
-	chr12	2180103	0.321969	0.321969	0.2426	MODIFIER	intergenic_region	HLA-DRB1-DLA-DQA1
-	chr12	2180385	-0.01894	0.01894	-0.0382	MODIFIER	intergenic_region	HLA-DRB1-DLA-DQA1
-	chr12	2181540	-0.178031	0.178031	0.0169	MODIFIER	intergenic_region	HLA-DRB1-DLA-DQA1
-	chr12	2181640	0.01894	0.01894	-0.0382	MODIFIER	intergenic_region	HLA-DRB1-DLA-DQA1
-	chr12	2181882	0.015151	0.015151	-0.0429	MODIFIER	intergenic_region	HLA-DRB1-DLA-DQA1
-	chr12	2181900	0.01894	0.01894	-0.0382	MODIFIER	intergenic_region	HLA-DRB1-DLA-DQA1
-	chr12	2181955	0.01894	0.01894	-0.0382	MODIFIER	intergenic_region	HLA-DRB1-DLA-DQA1
-	chr12	2182094	0.01894	0.01894	-0.0382	MODIFIER	intergenic_region	HLA-DRB1-DLA-DQA1
-	chr12	2182181	0.136364	0.136364	-0.0108	MODIFIER	intergenic_region	HLA-DRB1-DLA-DQA1
-	chr12	2182266	-0.10606	0.10606	-0.02	MODIFIER	intergenic_region	HLA-DRB1-DLA-DQA1
-	chr12	2182295	0.045455	0.045455	-0.0347	MODIFIER	intergenic_region	HLA-DRB1-DLA-DQA1
-	chr12	2182318	0.045455	0.045455	-0.0347	MODIFIER	intergenic_region	HLA-DRB1-DLA-DQA1
-	chr12	2182327	0.045455	0.045455	-0.0347	MODIFIER	intergenic_region	HLA-DRB1-DLA-DQA1
-	chr12	2182489	-0.209091	0.209091	0.056	MODIFIER	intergenic_region	HLA-DRB1-DLA-DQA1
-	chr12	2184211	0	0	-0.045	MODIFIER	intergenic_region	HLA-DRB1-DLA-DQA1
-	chr12	2184237	0.094697	0.094697	0.0156	MODIFIER	intergenic_region	HLA-DRB1-DLA-DQA1
-	chr12	2186276	0.003788	0.003788	-0.0454	MODIFIER	intergenic_region	HLA-DRB1-DLA-DQA1
-	chr12	2186290	0.003788	0.003788	-0.0454	MODIFIER	intergenic_region	HLA-DRB1-DLA-DQA1
-	chr12	2186301	0.056818	0.056818	-0.0259	MODIFIER	intergenic_region	HLA-DRB1-DLA-DQA1
-	chr12	2186315	-0.037878	0.037878	-0.0319	MODIFIER	intergenic_region	HLA-DRB1-DLA-DQA1
-	chr12	2186546	-0.041667	0.041667	-0.0038	MODIFIER	intergenic_region	HLA-DRB1-DLA-DQA1
-	chr12	2186562	0.053031	0.053031	-0.0478	MODIFIER	intergenic_region	HLA-DRB1-DLA-DQA1
-	chr12	2186564	0.007576	0.007576	-0.0689	MODIFIER	intergenic_region	HLA-DRB1-DLA-DQA1
-	chr12	2186566	-0.041667	0.041667	-0.0038	MODIFIER	intergenic_region	HLA-DRB1-DLA-DQA1
-	chr12	2186567	0	0	0	MODIFIER	intergenic_region	HLA-DRB1-DLA-DQA1
-	chr12	2186580	0.045455	0.045455	0.0041	MODIFIER	intergenic_region	HLA-DRB1-DLA-DQA1
-	chr12	2186588	-0.037878	0.037878	-0.0657	MODIFIER	intergenic_region	HLA-DRB1-DLA-DQA1
-	chr12	2186589	-0.166667	0.166667	0.1288	MODIFIER	intergenic_region	HLA-DRB1-DLA-DQA1
-	chr12	2186590	0.049242	0.049242	-0.0233	MODIFIER	intergenic_region	HLA-DRB1-DLA-DQA1
-	chr12	2186610	0.007576	0.007576	-0.0428	MODIFIER	intergenic_region	HLA-DRB1-DLA-DQA1
-	chr12	2186612	-0.125	0.125	0.0845	MODIFIER	intergenic_region	HLA-DRB1-DLA-DQA1
-	chr12	2186625	0.003788	0.003788	-0.0454	MODIFIER	intergenic_region	HLA-DRB1-DLA-DQA1
-	chr12	2186628	-0.079545	0.079545	-0.0014	MODIFIER	intergenic_region	HLA-DRB1-DLA-DQA1
-	chr12	2186639	-0.034091	0.034091	-0.0155	MODIFIER	intergenic_region	HLA-DRB1-DLA-DQA1
-	chr12	2186642	-0.083333	0.083333	0.0402	MODIFIER	intergenic_region	HLA-DRB1-DLA-DQA1
-	chr12	2186647	0.007576	0.007576	-0.0428	MODIFIER	intergenic_region	HLA-DRB1-DLA-DQA1
-	chr12	2186653	0.003788	0.003788	-0.0454	MODIFIER	intergenic_region	HLA-DRB1-DLA-DQA1
-	chr12	2186659	0.003788	0.003788	-0.0454	MODIFIER	intergenic_region	HLA-DRB1-DLA-DQA1
-	chr12	2186663	-0.034091	0.034091	-0.0355	MODIFIER	intergenic_region	HLA-DRB1-DLA-DQA1
-	chr12	2186688	-0.083333	0.083333	0.0402	MODIFIER	intergenic_region	HLA-DRB1-DLA-DQA1
-	chr12	2186689	0.140151	0.140151	0.0349	MODIFIER	intergenic_region	HLA-DRB1-DLA-DQA1
-	chr12	2186693	0	0	0	MODIFIER	intergenic_region	HLA-DRB1-DLA-DQA1
-	chr12	2186704	0.003788	0.003788	-0.0454	MODIFIER	intergenic_region	HLA-DRB1-DLA-DQA1
-	chr12	2186715	-0.125	0.125	0.055	MODIFIER	intergenic_region	HLA-DRB1-DLA-DQA1
-	chr12	2202742	-0.079545	0.079545	-0.027	MODIFIER	intergenic_region	HLA-DRB1-DLA-DQA1
-	chr12	2202745	0.007576	0.007576	-0.095	MODIFIER	intergenic_region	HLA-DRB1-DLA-DQA1
-	chr12	2206458	0.060606	0.060606	-0.0237	MODIFIER	intergenic_region	HLA-DRB1-DLA-DQA1
-	chr12	2207658	-0.280303	0.280303	0.1641	MODIFIER	intergenic_region	HLA-DRB1-DLA-DQA1
-	chr12	2207698	-0.280303	0.280303	0.1641	MODIFIER	intergenic_region	HLA-DRB1-DLA-DQA1
-	chr12	2207983	0.325758	0.325758	0.2082	MODIFIER	intergenic_region	HLA-DRB1-DLA-DQA1
-	chr12	2208010	-0.272727	0.272727	0.1457	MODIFIER	intergenic_region	HLA-DRB1-DLA-DQA1
-	chr12	2208261	0.479167	0.479167	0.3136	MODIFIER	intergenic_region	HLA-DRB1-DLA-DQA1
-	chr12	2208273	-0.083333	0.083333	0.0402	MODIFIER	intergenic_region	HLA-DRB1-DLA-DQA1
-	chr12	2208277	-0.037878	0.037878	-0.0319	MODIFIER	intergenic_region	HLA-DRB1-DLA-DQA1
-	chr12	2213306	0.090909	0.090909	0.0558	MODIFIER	intergenic_region	HLA-DRB1-DLA-DQA1
-	chr12	2214622	-0.0909091	0.0909091	0.0558	MODIFIER	intergenic_region	HLA-DRB1-DLA-DQA1
-	chr12	2215453	-0.022727	0.022727	-0.0312	MODIFIER	intergenic_region	HLA-DRB1-DLA-DQA1
-	chr12	2218735	0.053031	0.053031	-0.0108	MODIFIER	intergenic_region	HLA-DRB1-DLA-DQA1
-	chr12	2218736	0.011364	0.011364	-0.0194	MODIFIER	intergenic_region	HLA-DRB1-DLA-DQA1
-	chr12	2218747	-0.117424	0.117424	0.0094	MODIFIER	intergenic_region	HLA-DRB1-DLA-DQA1
-	chr12	2218875	0	0	-0.0353	MODIFIER	intergenic_region	HLA-DRB1-DLA-DQA1
-	chr12	2218911	0.030303	0.030303	-0.0354	MODIFIER	intergenic_region	HLA-DRB1-DLA-DQA1
-	chr12	2218982	0.280303	0.280303	0.1641	MODIFIER	intergenic_region	HLA-DRB1-DLA-DQA1
-	chr12	2219086	-0.236364	0.236364	0.0689	MODIFIER	intergenic_region	HLA-DRB1-DLA-DQA1
-	chr12	2219156	0.375	0.375	0.2249	MODIFIER	intergenic_region	HLA-DRB1-DLA-DQA1
-	chr12	2219308	0.109849	0.109849	-0.0299	MODIFIER	intergenic_region	HLA-DRB1-DLA-DQA1
-	chr12	2220222	-0.064394	0.064394	-0.0207	MODIFIER	upstream_gene_variant	DLA-DQA1
-	chr12	2220301	-0.030303	0.030303	-0.0354	MODIFIER	upstream_gene_variant	DLA-DQA1
TFBS	chr12	2220883	-0.280303	0.280303	0.1641	MODIFIER	upstream_gene_variant	DLA-DQA1
TFBS	chr12	2220892	0.280303	0.280303	0.1641	MODIFIER	upstream_gene_variant	DLA-DQA1
-	chr12	2221177	0.01894	0.01894	-0.0333	MODIFIER	upstream_gene_variant	DLA-DQA1
-	chr12	2221643	0.280303	0.280303	0.1641	MODIFIER	upstream_gene_variant	DLA-DQA1
-	chr12	2221769	0	0	0	MODIFIER	upstream_gene_variant	DLA-DQA1
-	chr12	2223827	0.299242	0.299242	0.1416	MODIFIER	upstream_gene_variant	DLA-DQA1
-	chr12	2223897	-0.280303	0.280303	0.1641	MODIFIER	upstream_gene_variant	DLA-DQA1
-	chr12	2224232	0.022727	0.022727	-0.0294	MODIFIER	upstream_gene_variant	DLA-DQA1
-	chr12	2224377	-0.280303	0.280303	0.1641	MODIFIER	upstream_gene_variant	DLA-DQA1
-	chr12	2224378	-0.280303	0.280303	0.1641	MODIFIER	upstream_gene_variant	DLA-DQA1
-	chr12	2224547	-0.045455	0.045455	-0.0273	MODIFIER	upstream_gene_variant	DLA-DQA1
-	chr12	2224740	0.045455	0.045455	0.0041	MODIFIER	upstream_gene_variant	DLA-DQA1
-	chr12	2226095	0.094697	0.094697	0.0052	LOW	synonymous_variant	DLA-DQA1
-	chr12	2227109	0.064394	0.064394	-0.0207	MODIFIER	downstream_gene_variant	DLA-DQA1
-	chr12	2227113	0.041667	0.041667	-0.0086	MODIFIER	downstream_gene_variant	DLA-DQA1
-	chr12	2227198	0.022727	0.022727	-0.0294	MODIFIER	downstream_gene_variant	DLA-DQA1
-	chr12	2227231	0.022727	0.022727	-0.0294	MODIFIER	downstream_gene_variant	DLA-DQA1
-	chr12	2227596	-0.102273	0.102273	0.0005	MODIFIER	downstream_gene_variant	DLA-DQA1
-	chr12	2229203	-0.136364	0.136364	0.0281	MODIFIER	downstream_gene_variant	DLA-DQA1
-	chr12	2229245	-0.136364	0.136364	0.0281	MODIFIER	downstream_gene_variant	DLA-DQA1
-	chr12	2229314	0.022727	0.022727	-0.0294	MODIFIER	downstream_gene_variant	DLA-DQA1
-	chr12	2229328	0	0	-0.0317	MODIFIER	downstream_gene_variant	DLA-DQA1
-	chr12	2229334	0.072727	0.072727	-0.0195	MODIFIER	downstream_gene_variant	DLA-DQA1
-	chr12	2229382	0.016667	0.016667	-0.0468	MODIFIER	downstream_gene_variant	DLA-DQA1
-	chr12	2229392	-0.209091	0.209091	0.0524	MODIFIER	downstream_gene_variant	DLA-DQA1
-	chr12	2229708	-0.177273	0.177273	0.0856	MODIFIER	downstream_gene_variant	DLA-DQA1
-	chr12	2229710	0.185606	0.185606	0.1102	MODIFIER	downstream_gene_variant	DLA-DQA1
-	chr12	2229713	-0.090909	0.090909	0	MODIFIER	downstream_gene_variant	DLA-DQA1
-	chr12	2229722	-0.177273	0.177273	0.0856	MODIFIER	downstream_gene_variant	DLA-DQA1
-	chr12	2229764	0.079545	0.079545	-0.0005	MODIFIER	downstream_gene_variant	DLA-DQA1
-	chr12	2229878	0.189394	0.189394	0.0876	MODIFIER	downstream_gene_variant	DLA-DQA1
-	chr12	2230004	0.136364	0.136364	0.0281	MODIFIER	downstream_gene_variant	DLA-DQA1
-	chr12	2230028	0.189394	0.189394	0.0876	MODIFIER	downstream_gene_variant	DLA-DQA1
-	chr12	2230046	-0.181818	0.181818	0.0554	MODIFIER	downstream_gene_variant	DLA-DQA1
-	chr12	2230099	-0.132576	0.132576	0.0242	MODIFIER	downstream_gene_variant	DLA-DQA1
-	chr12	2230233	-0.136364	0.136364	0.0281	MODIFIER	downstream_gene_variant	DLA-DQA1
-	chr12	2230458	-0.090909	0.090909	0.0097	MODIFIER	downstream_gene_variant	DLA-DQA1
-	chr12	2231763	0.14394	0.14394	0.0432	MODIFIER	intergenic_region	DLA-DQA1-DLA-DQB1
-	chr12	2231806	-0.121212	0.121212	0.015	MODIFIER	intergenic_region	DLA-DQA1-DLA-DQB1
-	chr12	2231949	0.185606	0.185606	0.1102	MODIFIER	intergenic_region	DLA-DQA1-DLA-DQB1
-	chr12	2231951	0.003788	0.003788	-0.0454	MODIFIER	intergenic_region	DLA-DQA1-DLA-DQB1
-	chr12	2232131	-0.068182	0.068182	-0.02	MODIFIER	intergenic_region	DLA-DQA1-DLA-DQB1
-	chr12	2232141	0.083333	0.083333	0.007	MODIFIER	intergenic_region	DLA-DQA1-DLA-DQB1
-	chr12	2232173	0	0	0	MODIFIER	intergenic_region	DLA-DQA1-DLA-DQB1
-	chr12	2232866	0.125	0.125	0.0219	MODIFIER	intergenic_region	DLA-DQA1-DLA-DQB1
-	chr12	2232966	-0.132576	0.132576	0.0242	MODIFIER	intergenic_region	DLA-DQA1-DLA-DQB1
-	chr12	2233246	-0.158333	0.158333	0.0602	MODIFIER	intergenic_region	DLA-DQA1-DLA-DQB1
-	chr12	2233566	-0.136364	0.136364	0.0313	MODIFIER	intergenic_region	DLA-DQA1-DLA-DQB1
-	chr12	2234331	0.132576	0.132576	0.0242	MODIFIER	intergenic_region	DLA-DQA1-DLA-DQB1
-	chr12	2237004	-0.053031	0.053031	-0.0108	MODIFIER	intergenic_region	DLA-DQA1-DLA-DQB1
-	chr12	2237144	0.174242	0.174242	0.0456	MODIFIER	intergenic_region	DLA-DQA1-DLA-DQB1
-	chr12	2238589	0.098485	0.098485	0.0042	MODIFIER	intergenic_region	DLA-DQA1-DLA-DQB1
-	chr12	2238740	0.15	0.15	0.1278	MODIFIER	intergenic_region	DLA-DQA1-DLA-DQB1
-	chr12	2238776	-0.2	0.2	0.0359	MODIFIER	intergenic_region	DLA-DQA1-DLA-DQB1
-	chr12	2238778	0.05	0.05	-0.0709	MODIFIER	intergenic_region	DLA-DQA1-DLA-DQB1
-	chr12	2238779	-0.102273	0.102273	-0.0463	MODIFIER	intergenic_region	DLA-DQA1-DLA-DQB1
-	chr12	2238782	0.022727	0.022727	-0.0725	MODIFIER	intergenic_region	DLA-DQA1-DLA-DQB1
-	chr12	2238783	-0.075	0.075	-0.0618	MODIFIER	intergenic_region	DLA-DQA1-DLA-DQB1
-	chr12	2238846	-0.208333	0.208333	0.1204	MODIFIER	intergenic_region	DLA-DQA1-DLA-DQB1
-	chr12	2238847	-0.208333	0.208333	0.1204	MODIFIER	intergenic_region	DLA-DQA1-DLA-DQB1
-	chr12	2238890	0.140151	0.140151	0.0612	MODIFIER	intergenic_region	DLA-DQA1-DLA-DQB1
-	chr12	2238937	0.189394	0.189394	0.0876	MODIFIER	intergenic_region	DLA-DQA1-DLA-DQB1
-	chr12	2238993	-0.037878	0.037878	-0.0248	MODIFIER	intergenic_region	DLA-DQA1-DLA-DQB1
-	chr12	2239856	0.041667	0.041667	-0.0003	MODIFIER	downstream_gene_variant	DLA-DQB1
-	chr12	2239861	-0.132576	0.132576	0.0242	MODIFIER	downstream_gene_variant	DLA-DQB1
-	chr12	2239892	0.132576	0.132576	0.0242	MODIFIER	downstream_gene_variant	DLA-DQB1
-	chr12	2240471	0.189394	0.189394	0.0876	MODIFIER	downstream_gene_variant	DLA-DQB1
-	chr12	2240509	-0.132576	0.132576	0.0242	MODIFIER	downstream_gene_variant	DLA-DQB1
-	chr12	2240514	0.022727	0.022727	-0.0294	MODIFIER	downstream_gene_variant	DLA-DQB1
-	chr12	2240559	-0.003788	0.003788	-0.0076	MODIFIER	downstream_gene_variant	DLA-DQB1
-	chr12	2240674	-0.045455	0.045455	0	MODIFIER	downstream_gene_variant	DLA-DQB1
-	chr12	2240807	0.066667	0.066667	-0.0206	MODIFIER	downstream_gene_variant	DLA-DQB1
-	chr12	2240865	-0.045455	0.045455	-0.0273	MODIFIER	downstream_gene_variant	DLA-DQB1
-	chr12	2240980	0.136364	0.136364	0.0313	MODIFIER	downstream_gene_variant	DLA-DQB1
-	chr12	2241009	-0.045455	0.045455	-0.0182	MODIFIER	downstream_gene_variant	DLA-DQB1
-	chr12	2241084	0	0	0	MODIFIER	downstream_gene_variant	DLA-DQB1
-	chr12	2241109	0.041667	0.041667	-0.0086	MODIFIER	downstream_gene_variant	DLA-DQB1
-	chr12	2242026	0.041667	0.041667	-0.0003	MODIFIER	downstream_gene_variant	DLA-DQB1
-	chr12	2242117	0.189394	0.189394	0.0876	MODIFIER	downstream_gene_variant	DLA-DQB1
-	chr12	2242188	0.1	0.1	0.012	MODIFIER	downstream_gene_variant	DLA-DQB1
-	chr12	2242334	-0.121212	0.121212	0.015	MODIFIER	downstream_gene_variant	DLA-DQB1
-	chr12	2242498	0.185606	0.185606	0.1102	MODIFIER	downstream_gene_variant	DLA-DQB1
-	chr12	2242518	0.125	0.125	0.0118	MODIFIER	downstream_gene_variant	DLA-DQB1
-	chr12	2242550	-0.007576	0.007576	-0.014	MODIFIER	downstream_gene_variant	DLA-DQB1
-	chr12	2242656	-0.257576	0.257576	0.1085	MODIFIER	downstream_gene_variant	DLA-DQB1
-	chr12	2242677	-0.083333	0.083333	-0.0179	MODIFIER	downstream_gene_variant	DLA-DQB1
-	chr12	2242771	0.136364	0.136364	0.0252	MODIFIER	downstream_gene_variant	DLA-DQB1
-	chr12	2242960	0.098485	0.098485	-0.0138	MODIFIER	downstream_gene_variant	DLA-DQB1
-	chr12	2243026	0.15	0.15	0.1197	MODIFIER	downstream_gene_variant	DLA-DQB1
-	chr12	2243086	0.189394	0.189394	0.0876	MODIFIER	downstream_gene_variant	DLA-DQB1
-	chr12	2243147	0.0833333	0.0833333	0.0402	MODIFIER	downstream_gene_variant	DLA-DQB1
-	chr12	2244216	0.041667	0.041667	-0.0003	MODIFIER	downstream_gene_variant	DLA-DQB1
-	chr12	2244618	-0.132576	0.132576	0.0242	MODIFIER	3_prime_UTR_variant	DLA-DQB1
-	chr12	2244718	0.189394	0.189394	0.0876	MODIFIER	3_prime_UTR_variant	DLA-DQB1
-	chr12	2244719	0.189394	0.189394	0.0876	MODIFIER	3_prime_UTR_variant	DLA-DQB1
-	chr12	2244769	0.136364	0.136364	0.0252	MODIFIER	3_prime_UTR_variant	DLA-DQB1
-	chr12	2244991	0.041667	0.041667	-0.0003	MODIFIER	3_prime_UTR_variant	DLA-DQB1
-	chr12	2245246	-0.102273	0.102273	-0.009	MODIFIER	intron_variant	DLA-DQB1
-	chr12	2245258	-0.091667	0.091667	0.0084	MODIFIER	intron_variant	DLA-DQB1
-	chr12	2245355	-0.041667	0.041667	-0.0003	MODIFIER	intron_variant	DLA-DQB1
-	chr12	2245363	0.23106	0.23106	0.1609	MODIFIER	intron_variant	DLA-DQB1
-	chr12	2245373	-0.011364	0.011364	-0.0399	MODIFIER	intron_variant	DLA-DQB1
-	chr12	2245381	0.087122	0.087122	-0.0089	MODIFIER	intron_variant	DLA-DQB1
-	chr12	2245820	-0.011364	0.011364	-0.0194	MODIFIER	intron_variant	DLA-DQB1
-	chr12	2245880	-0.094697	0.094697	0.0052	MODIFIER	intron_variant	DLA-DQB1
-	chr12	2245886	0.049242	0.049242	-0.0058	MODIFIER	intron_variant	DLA-DQB1
-	chr12	2245936	-0.189394	0.189394	0.0585	MODIFIER	intron_variant	DLA-DQB1
-	chr12	2245943	-0.058333	0.058333	-0.0271	MODIFIER	intron_variant	DLA-DQB1
-	chr12	2245981	-0.075758	0.075758	-0.0245	MODIFIER	intron_variant	DLA-DQB1
-	chr12	2245984	0.025	0.025	-0.0301	MODIFIER	intron_variant	DLA-DQB1
-	chr12	2246001	0.0833333	0.0833333	0.0402	MODIFIER	intron_variant	DLA-DQB1
-	chr12	2246004	0.01894	0.01894	-0.0333	MODIFIER	intron_variant	DLA-DQB1
-	chr12	2246008	0.132576	0.132576	0.016	MODIFIER	intron_variant	DLA-DQB1
-	chr12	2246012	-0.185606	0.185606	0.0556	MODIFIER	intron_variant	DLA-DQB1
-	chr12	2246029	-0.071969	0.071969	-0.0186	MODIFIER	intron_variant	DLA-DQB1
-	chr12	2246065	0.015151	0.015151	-0.0368	MODIFIER	intron_variant	DLA-DQB1
-	chr12	2246170	0.034091	0.034091	-0.0145	MODIFIER	intron_variant	DLA-DQB1
-	chr12	2246653	-0.031818	0.031818	-0.0383	LOW	splice_region_variant&intron_variant	DLA-DQB1
-	chr12	2246760	0	0	0	MODIFIER	intron_variant	DLA-DQB1
-	chr12	2246868	-0.081818	0.081818	-0.008	MODIFIER	intron_variant	DLA-DQB1
-	chr12	2246922	0.026515	0.026515	-0.0251	MODIFIER	intron_variant	DLA-DQB1
-	chr12	2246990	0.155303	0.155303	0.0225	MODIFIER	intron_variant	DLA-DQB1
-	chr12	2247027	0.181818	0.181818	0.054	MODIFIER	intron_variant	DLA-DQB1
-	chr12	2247039	0.090909	0.090909	0.0558	MODIFIER	intron_variant	DLA-DQB1
-	chr12	2247313	0.003788	0.003788	-0.0454	MODERATE	missense_variant	DLA-DQB1
-	chr12	2247338	-0.185606	0.185606	0.1102	MODERATE	missense_variant	DLA-DQB1
-	chr12	2247405	0.185606	0.185606	0.1102	LOW	synonymous_variant	DLA-DQB1
-	chr12	2247437	-0.132576	0.132576	0.016	MODIFIER	intron_variant	DLA-DQB1
-	chr12	2247488	-0.007576	0.007576	-0.014	MODIFIER	intron_variant	DLA-DQB1
-	chr12	2247522	0.14394	0.14394	0.0432	MODIFIER	intron_variant	DLA-DQB1
-	chr12	2248515	0.189394	0.189394	0.0876	MODIFIER	intron_variant	DLA-DQB1
-	chr12	2248656	-0.181818	0.181818	0.0496	MODIFIER	intron_variant	DLA-DQB1
-	chr12	2248689	0.090909	0.090909	0.0558	MODIFIER	intron_variant	DLA-DQB1
-	chr12	2248708	-0.01894	0.01894	-0.0382	MODIFIER	intron_variant	DLA-DQB1
-	chr12	2248760	0.10606	0.10606	0.0002	MODIFIER	intron_variant	DLA-DQB1
-	chr12	2248788	0.299242	0.299242	0.1494	MODIFIER	intron_variant	DLA-DQB1
-	chr12	2248844	-0.159091	0.159091	0.0326	MODIFIER	intron_variant	DLA-DQB1
-	chr12	2248896	-0.181818	0.181818	0.0514	MODERATE	missense_variant	DLA-DQB1
-	chr12	2248897	0.314394	0.314394	0.1657	MODERATE	missense_variant	DLA-DQB1
-	chr12	2248899	0.170455	0.170455	0.0359	MODERATE	missense_variant	DLA-DQB1
-	chr12	2248900	0.227272	0.227272	0.0237	MODERATE	missense_variant	DLA-DQB1
-	chr12	2248905	-0.181818	0.181818	0.0514	MODERATE	missense_variant	DLA-DQB1
-	chr12	2248908	-0.181818	0.181818	0.0514	MODERATE	missense_variant	DLA-DQB1
-	chr12	2248955	-0.15	0.15	-0.0556	LOW	synonymous_variant	DLA-DQB1
-	chr12	2248956	-0.15	0.15	-0.0556	MODERATE	missense_variant	DLA-DQB1
-	chr12	2248959	-0.15	0.15	-0.0556	MODERATE	missense_variant	DLA-DQB1
-	chr12	2248961	-0.15	0.15	-0.0556	MODERATE	missense_variant	DLA-DQB1
-	chr12	2248989	-0.037878	0.037878	-0.0319	MODERATE	missense_variant	DLA-DQB1
-	chr12	2249028	-0.172727	0.172727	0.0431	MODERATE	missense_variant	DLA-DQB1
-	chr12	2249056	0.090909	0.090909	-0.0027	MODERATE	missense_variant	DLA-DQB1
-	chr12	2249058	0	0	-0.0248	MODERATE	missense_variant	DLA-DQB1
-	chr12	2249059	0.162878	0.162878	0.0301	MODERATE	missense_variant	DLA-DQB1
-	chr12	2249077	-0.077273	0.077273	-0.0198	MODERATE	missense_variant	DLA-DQB1
-	chr12	2249080	0.056818	0.056818	-0.0259	MODERATE	missense_variant	DLA-DQB1
-	chr12	2249081	-0.077273	0.077273	-0.0198	LOW	synonymous_variant	DLA-DQB1
-	chr12	2249086	-0.031818	0.031818	-0.0383	MODERATE	missense_variant	DLA-DQB1
-	chr12	2249090	-0.031818	0.031818	-0.0383	MODERATE	missense_variant	DLA-DQB1
-	chr12	2249092	-0.036364	0.036364	-0.0207	MODERATE	missense_variant	DLA-DQB1
-	chr12	2249121	0.098485	0.098485	0.0042	MODERATE	missense_variant	DLA-DQB1
-	chr12	2249128	0.159091	0.159091	0.0347	MODERATE	missense_variant	DLA-DQB1
-	chr12	2249130	-0.0454549	0.0454549	-0.0016	MODERATE	missense_variant	DLA-DQB1
-	chr12	2249131	0.159091	0.159091	0.0347	MODERATE	missense_variant	DLA-DQB1
-	chr12	2249142	-0.0909089	0.0909089	-0.0052	MODERATE	missense_variant	DLA-DQB1
-	chr12	2249143	0.037878	0.037878	-0.0248	MODERATE	missense_variant	DLA-DQB1
-	chr12	2249189	0.045455	0.045455	-0.0182	MODIFIER	intron_variant	DLA-DQB1
-	chr12	2249256	-0.090909	0.090909	0.0091	MODIFIER	intron_variant	DLA-DQB1
-	chr12	2250565	0.041667	0.041667	-0.0003	MODIFIER	intron_variant	DLA-DQB1
-	chr12	2250942	0	0	#NAME?	MODIFIER	upstream_gene_variant	DLA-DQB1
TFBS	chr12	2250952	0.14394	0.14394	0.0432	MODIFIER	upstream_gene_variant	DLA-DQB1
-	chr12	2251544	0.01894	0.01894	-0.0333	MODIFIER	upstream_gene_variant	DLA-DQB1
-	chr12	2251552	-0.181818	0.181818	0.0517	MODIFIER	upstream_gene_variant	DLA-DQB1
-	chr12	2251570	0.030303	0.030303	-0.0201	MODIFIER	upstream_gene_variant	DLA-DQB1
-	chr12	2251585	0.01894	0.01894	-0.0333	MODIFIER	upstream_gene_variant	DLA-DQB1
-	chr12	2252842	-0.132576	0.132576	0.016	MODIFIER	upstream_gene_variant	DLA-DQB1
-	chr12	2252844	-0.132576	0.132576	0.016	MODIFIER	upstream_gene_variant	DLA-DQB1
-	chr12	2252845	0.083333	0.083333	0.007	MODIFIER	upstream_gene_variant	DLA-DQB1
-	chr12	2252851	0.083333	0.083333	0.007	MODIFIER	upstream_gene_variant	DLA-DQB1
-	chr12	2252945	-0.049242	0.049242	-0.0058	MODIFIER	upstream_gene_variant	DLA-DQB1
-	chr12	2253410	0.189394	0.189394	0.0876	MODIFIER	upstream_gene_variant	DLA-DQB1
-	chr12	2253652	0.022727	0.022727	-0.0294	MODIFIER	upstream_gene_variant	DLA-DQB1
-	chr12	2254556	0	0	0	MODIFIER	upstream_gene_variant	DLA-DQB1
-	chr12	2254560	0	0	0	MODIFIER	upstream_gene_variant	DLA-DQB1
-	chr12	2254620	-0.049242	0.049242	-0.0058	MODIFIER	upstream_gene_variant	DLA-DQB1
-	chr12	2254737	0.01894	0.01894	-0.0333	MODIFIER	upstream_gene_variant	DLA-DQB1
-	chr12	2254876	0	0	0	MODIFIER	upstream_gene_variant	DLA-DQB1
-	chr12	2254979	-0.049242	0.049242	-0.0058	MODIFIER	upstream_gene_variant	DLA-DQB1
-	chr12	2255935	0	0	0	MODIFIER	intergenic_region	DLA-DQB1-ENSCAFG00000020749
-	chr12	2255973	0	0	0	MODIFIER	intergenic_region	DLA-DQB1-ENSCAFG00000020749
-	chr12	2256071	0.079545	0.079545	-0.0005	MODIFIER	intergenic_region	DLA-DQB1-ENSCAFG00000020749
-	chr12	2256275	0.14394	0.14394	0.0432	MODIFIER	intergenic_region	DLA-DQB1-ENSCAFG00000020749
-	chr12	2256499	0.041667	0.041667	-0.0003	MODIFIER	intergenic_region	DLA-DQB1-ENSCAFG00000020749
-	chr12	2256567	0.041667	0.041667	-0.0003	MODIFIER	intergenic_region	DLA-DQB1-ENSCAFG00000020749
-	chr12	2256573	0.23106	0.23106	0.1609	MODIFIER	intergenic_region	DLA-DQB1-ENSCAFG00000020749
-	chr12	2257407	0.041667	0.041667	-0.0003	MODIFIER	intergenic_region	DLA-DQB1-ENSCAFG00000020749
-	chr12	2257499	0.113636	0.113636	0.005	MODIFIER	intergenic_region	DLA-DQB1-ENSCAFG00000020749
-	chr12	2257538	0.0454546	0.0454546	-0.029	MODIFIER	intergenic_region	DLA-DQB1-ENSCAFG00000020749
-	chr12	2257644	-0.022727	0.022727	-0.0312	MODIFIER	intergenic_region	DLA-DQB1-ENSCAFG00000020749
-	chr12	2257656	-0.117424	0.117424	0.0094	MODIFIER	intergenic_region	DLA-DQB1-ENSCAFG00000020749
-	chr12	2257671	-0.117424	0.117424	0.0094	MODIFIER	intergenic_region	DLA-DQB1-ENSCAFG00000020749
-	chr12	2257965	0	0	0	MODIFIER	intergenic_region	DLA-DQB1-ENSCAFG00000020749
-	chr12	2257977	0.030303	0.030303	-0.0201	MODIFIER	intergenic_region	DLA-DQB1-ENSCAFG00000020749
-	chr12	2258253	0.041667	0.041667	-0.0003	MODIFIER	intergenic_region	DLA-DQB1-ENSCAFG00000020749
-	chr12	2258479	0.189394	0.189394	0.0876	MODIFIER	intergenic_region	DLA-DQB1-ENSCAFG00000020749
-	chr12	2258495	-0.041667	0.041667	-0.0003	MODIFIER	intergenic_region	DLA-DQB1-ENSCAFG00000020749
-	chr12	2258576	-0.136364	0.136364	0.0281	MODIFIER	intergenic_region	DLA-DQB1-ENSCAFG00000020749
-	chr12	2258609	0.041667	0.041667	-0.0003	MODIFIER	intergenic_region	DLA-DQB1-ENSCAFG00000020749
-	chr12	2258615	0.041667	0.041667	-0.0003	MODIFIER	intergenic_region	DLA-DQB1-ENSCAFG00000020749
-	chr12	2258646	0.159091	0.159091	0.0347	MODIFIER	intergenic_region	DLA-DQB1-ENSCAFG00000020749
-	chr12	2258664	-0.136364	0.136364	0.0281	MODIFIER	intergenic_region	DLA-DQB1-ENSCAFG00000020749
-	chr12	2258681	-0.05	0.05	0.0009	MODIFIER	intergenic_region	DLA-DQB1-ENSCAFG00000020749
-	chr12	2258690	-0.181818	0.181818	0.0554	MODIFIER	intergenic_region	DLA-DQB1-ENSCAFG00000020749
-	chr12	2258862	0.138889	0.138889	-0.0385	MODIFIER	intergenic_region	DLA-DQB1-ENSCAFG00000020749
-	chr12	2258991	0.090909	0.090909	-0.0052	MODIFIER	intergenic_region	DLA-DQB1-ENSCAFG00000020749
-	chr12	2259064	-0.136364	0.136364	0.0281	MODIFIER	intergenic_region	DLA-DQB1-ENSCAFG00000020749
-	chr12	2259075	0.083333	0.083333	0.007	MODIFIER	intergenic_region	DLA-DQB1-ENSCAFG00000020749
-	chr12	2259114	0	0	0	MODIFIER	intergenic_region	DLA-DQB1-ENSCAFG00000020749
-	chr12	2259208	-0.041667	0.041667	-0.0252	MODIFIER	intergenic_region	DLA-DQB1-ENSCAFG00000020749
-	chr12	2259245	0.022727	0.022727	-0.0294	MODIFIER	intergenic_region	DLA-DQB1-ENSCAFG00000020749
-	chr12	2260451	0	0	0	MODIFIER	intergenic_region	DLA-DQB1-ENSCAFG00000020749
-	chr12	2260474	0.079545	0.079545	-0.0005	MODIFIER	intergenic_region	DLA-DQB1-ENSCAFG00000020749
-	chr12	2260478	-0.083333	0.083333	0.007	MODIFIER	intergenic_region	DLA-DQB1-ENSCAFG00000020749
-	chr12	2260479	0.079545	0.079545	-0.0005	MODIFIER	intergenic_region	DLA-DQB1-ENSCAFG00000020749
-	chr12	2260863	0	0	0	MODIFIER	intergenic_region	DLA-DQB1-ENSCAFG00000020749
-	chr12	2261082	-0.0037878	0.0037878	-0.0454	MODIFIER	intergenic_region	DLA-DQB1-ENSCAFG00000020749
-	chr12	2261522	0.189394	0.189394	0.0876	MODIFIER	intergenic_region	DLA-DQB1-ENSCAFG00000020749
-	chr12	2261542	0	0	0	MODIFIER	intergenic_region	DLA-DQB1-ENSCAFG00000020749
-	chr12	2261579	-0.003788	0.003788	-0.0076	MODIFIER	intergenic_region	DLA-DQB1-ENSCAFG00000020749
-	chr12	2261614	0.189394	0.189394	0.0876	MODIFIER	intergenic_region	DLA-DQB1-ENSCAFG00000020749
-	chr12	2261651	0	0	0	MODIFIER	intergenic_region	DLA-DQB1-ENSCAFG00000020749
-	chr12	2261652	0	0	0	MODIFIER	intergenic_region	DLA-DQB1-ENSCAFG00000020749
-	chr12	2261698	0.083333	0.083333	0.007	MODIFIER	intergenic_region	DLA-DQB1-ENSCAFG00000020749
-	chr12	2261716	0.083333	0.083333	0.007	MODIFIER	intergenic_region	DLA-DQB1-ENSCAFG00000020749
-	chr12	2261850	-0.034091	0.034091	-0.0355	MODIFIER	intergenic_region	DLA-DQB1-ENSCAFG00000020749
-	chr12	2261854	0.094697	0.094697	0.0156	MODIFIER	intergenic_region	DLA-DQB1-ENSCAFG00000020749
-	chr12	2261991	-0.022727	0.022727	-0.0312	MODIFIER	intergenic_region	DLA-DQB1-ENSCAFG00000020749
-	chr12	2262017	-0.068182	0.068182	-0.02	MODIFIER	intergenic_region	DLA-DQB1-ENSCAFG00000020749
-	chr12	2262804	0	0	0	MODIFIER	intergenic_region	DLA-DQB1-ENSCAFG00000020749
-	chr12	2263161	0.063636	0.063636	-0.0446	MODIFIER	intergenic_region	DLA-DQB1-ENSCAFG00000020749
-	chr12	2263227	-0.10606	0.10606	0.0001	MODIFIER	intergenic_region	DLA-DQB1-ENSCAFG00000020749
-	chr12	2263240	-0.136363	0.136363	0.0175	MODIFIER	intergenic_region	DLA-DQB1-ENSCAFG00000020749
-	chr12	2263250	0.189394	0.189394	0.0876	MODIFIER	intergenic_region	DLA-DQB1-ENSCAFG00000020749
-	chr12	2263258	-0.090909	0.090909	0.0097	MODIFIER	intergenic_region	DLA-DQB1-ENSCAFG00000020749
-	chr12	2263289	-0.0909091	0.0909091	0.05	MODIFIER	intergenic_region	DLA-DQB1-ENSCAFG00000020749
-	chr12	2263290	0.060606	0.060606	-0.0237	MODIFIER	intergenic_region	DLA-DQB1-ENSCAFG00000020749
-	chr12	2263301	-0.054545	0.054545	-0.0068	MODIFIER	intergenic_region	DLA-DQB1-ENSCAFG00000020749
-	chr12	2263313	-0.045455	0.045455	-0.0091	MODIFIER	intergenic_region	DLA-DQB1-ENSCAFG00000020749
-	chr12	2263350	-0.007576	0.007576	-0.0226	MODIFIER	intergenic_region	DLA-DQB1-ENSCAFG00000020749
-	chr12	2263535	-0.045454	0.045454	-0.0076	MODIFIER	intergenic_region	DLA-DQB1-ENSCAFG00000020749
-	chr12	2263553	0.14394	0.14394	0.0432	MODIFIER	intergenic_region	DLA-DQB1-ENSCAFG00000020749
-	chr12	2263559	0.14394	0.14394	0.0432	MODIFIER	intergenic_region	DLA-DQB1-ENSCAFG00000020749
-	chr12	2263748	0	0	-0.0083	MODIFIER	intergenic_region	DLA-DQB1-ENSCAFG00000020749
-	chr12	2263784	-0.090909	0.090909	0.0097	MODIFIER	intergenic_region	DLA-DQB1-ENSCAFG00000020749
-	chr12	2263799	-0.090909	0.090909	0.0097	MODIFIER	intergenic_region	DLA-DQB1-ENSCAFG00000020749
-	chr12	2264256	0.178031	0.178031	0.0493	MODIFIER	intergenic_region	DLA-DQB1-ENSCAFG00000020749
-	chr12	2264264	0.055556	0.055556	0.0012	MODIFIER	intergenic_region	DLA-DQB1-ENSCAFG00000020749
-	chr12	2264283	0.208333	0.208333	0.074	MODIFIER	intergenic_region	DLA-DQB1-ENSCAFG00000020749
-	chr12	2264977	0.090909	0.090909	0.0091	MODIFIER	intergenic_region	DLA-DQB1-ENSCAFG00000020749
-	chr12	2264979	0.132576	0.132576	0.0242	MODIFIER	intergenic_region	DLA-DQB1-ENSCAFG00000020749
-	chr12	2264982	0.041667	0.041667	-0.0003	MODIFIER	intergenic_region	DLA-DQB1-ENSCAFG00000020749
-	chr12	2264983	0.041667	0.041667	-0.0003	MODIFIER	intergenic_region	DLA-DQB1-ENSCAFG00000020749
-	chr12	2264984	0.041667	0.041667	-0.0003	MODIFIER	intergenic_region	DLA-DQB1-ENSCAFG00000020749
-	chr12	2265422	0.022727	0.022727	-0.0294	MODIFIER	intergenic_region	DLA-DQB1-ENSCAFG00000020749
-	chr12	2265444	-0.090909	0.090909	0.0097	MODIFIER	intergenic_region	DLA-DQB1-ENSCAFG00000020749
-	chr12	2265688	0.1	0.1	0.0111	MODIFIER	intergenic_region	DLA-DQB1-ENSCAFG00000020749
-	chr12	2265717	-0.090909	0.090909	0.0097	MODIFIER	intergenic_region	DLA-DQB1-ENSCAFG00000020749
-	chr12	2265734	-0.022727	0.022727	-0.0312	MODIFIER	intergenic_region	DLA-DQB1-ENSCAFG00000020749
-	chr12	2265926	-0.140151	0.140151	0.0256	MODIFIER	intergenic_region	DLA-DQB1-ENSCAFG00000020749
-	chr12	2266207	-0.037878	0.037878	-0.0164	MODIFIER	intergenic_region	DLA-DQB1-ENSCAFG00000020749
-	chr12	2266241	-0.022727	0.022727	-0.0312	MODIFIER	intergenic_region	DLA-DQB1-ENSCAFG00000020749
-	chr12	2266253	-0.037878	0.037878	-0.0164	MODIFIER	intergenic_region	DLA-DQB1-ENSCAFG00000020749
-	chr12	2266267	0.090909	0.090909	0.0025	MODIFIER	intergenic_region	DLA-DQB1-ENSCAFG00000020749
-	chr12	2266542	-0.007576	0.007576	-0.014	MODIFIER	intergenic_region	DLA-DQB1-ENSCAFG00000020749
-	chr12	2266545	0.189394	0.189394	0.0876	MODIFIER	intergenic_region	DLA-DQB1-ENSCAFG00000020749
-	chr12	2266552	-0.189394	0.189394	0.0876	MODIFIER	intergenic_region	DLA-DQB1-ENSCAFG00000020749
-	chr12	2266608	-0.227273	0.227273	0.1071	MODIFIER	intergenic_region	DLA-DQB1-ENSCAFG00000020749
-	chr12	2266614	0	0	-0.0091	MODIFIER	intergenic_region	DLA-DQB1-ENSCAFG00000020749
-	chr12	2266718	0.083333	0.083333	0.007	MODIFIER	intergenic_region	DLA-DQB1-ENSCAFG00000020749
-	chr12	2266721	-0.083333	0.083333	0.007	MODIFIER	intergenic_region	DLA-DQB1-ENSCAFG00000020749
-	chr12	2266730	0.022727	0.022727	-0.0294	MODIFIER	intergenic_region	DLA-DQB1-ENSCAFG00000020749
-	chr12	2267138	-0.015151	0.015151	-0.0241	MODIFIER	intergenic_region	DLA-DQB1-ENSCAFG00000020749
-	chr12	2267170	0.272727	0.272727	0.2602	MODIFIER	intergenic_region	DLA-DQB1-ENSCAFG00000020749
-	chr12	2267171	-0.090909	0.090909	0.0091	MODIFIER	intergenic_region	DLA-DQB1-ENSCAFG00000020749
-	chr12	2267206	0.037878	0.037878	-0.0079	MODIFIER	intergenic_region	DLA-DQB1-ENSCAFG00000020749
-	chr12	2267218	-0.049242	0.049242	-0.0058	MODIFIER	intergenic_region	DLA-DQB1-ENSCAFG00000020749
-	chr12	2267239	0.064394	0.064394	-0.0207	MODIFIER	intergenic_region	DLA-DQB1-ENSCAFG00000020749
-	chr12	2267265	-0.185606	0.185606	0.0556	MODIFIER	intergenic_region	DLA-DQB1-ENSCAFG00000020749
-	chr12	2267278	0	0	0	MODIFIER	intergenic_region	DLA-DQB1-ENSCAFG00000020749
-	chr12	2267281	0.166667	0.166667	0.0446	MODIFIER	intergenic_region	DLA-DQB1-ENSCAFG00000020749
-	chr12	2267298	0.079545	0.079545	-0.0005	MODIFIER	intergenic_region	DLA-DQB1-ENSCAFG00000020749
-	chr12	2267351	0.083333	0.083333	0.007	MODIFIER	intergenic_region	DLA-DQB1-ENSCAFG00000020749
-	chr12	2267359	0.083333	0.083333	0.007	MODIFIER	intergenic_region	DLA-DQB1-ENSCAFG00000020749
-	chr12	2267387	0	0	0	MODIFIER	intergenic_region	DLA-DQB1-ENSCAFG00000020749
-	chr12	2267567	-0.011364	0.011364	-0.0194	MODIFIER	intergenic_region	DLA-DQB1-ENSCAFG00000020749
-	chr12	2267690	0.10606	0.10606	0.0002	MODIFIER	intergenic_region	DLA-DQB1-ENSCAFG00000020749
-	chr12	2267806	-0.116884	0.116884	0.0142	MODIFIER	intergenic_region	DLA-DQB1-ENSCAFG00000020749
-	chr12	2267841	0.025	0.025	-0.0173	MODIFIER	intergenic_region	DLA-DQB1-ENSCAFG00000020749
-	chr12	2267905	0.238636	0.238636	0.1217	MODIFIER	intergenic_region	DLA-DQB1-ENSCAFG00000020749
-	chr12	2267932	-0.003788	0.003788	-0.0076	MODIFIER	intergenic_region	DLA-DQB1-ENSCAFG00000020749
-	chr12	2268044	-0.011364	0.011364	-0.0194	MODIFIER	intergenic_region	DLA-DQB1-ENSCAFG00000020749
-	chr12	2268241	0.015151	0.015151	-0.0368	MODIFIER	intergenic_region	DLA-DQB1-ENSCAFG00000020749
-	chr12	2268254	0.041667	0.041667	-0.0155	MODIFIER	intergenic_region	DLA-DQB1-ENSCAFG00000020749
-	chr12	2268268	0.185606	0.185606	0.1102	MODIFIER	intergenic_region	DLA-DQB1-ENSCAFG00000020749
-	chr12	2268327	0.045455	0.045455	0	MODIFIER	intergenic_region	DLA-DQB1-ENSCAFG00000020749
-	chr12	2268388	0.136364	0.136364	0.1072	MODIFIER	intergenic_region	DLA-DQB1-ENSCAFG00000020749
-	chr12	2268446	0.098485	0.098485	0.0042	MODIFIER	intergenic_region	DLA-DQB1-ENSCAFG00000020749
-	chr12	2268452	-0.090909	0.090909	0.0097	MODIFIER	intergenic_region	DLA-DQB1-ENSCAFG00000020749
-	chr12	2268797	-0.15	0.15	0.0387	MODIFIER	intergenic_region	DLA-DQB1-ENSCAFG00000020749
-	chr12	2270018	-0.022727	0.022727	-0.0426	MODIFIER	intergenic_region	DLA-DQB1-ENSCAFG00000020749
-	chr12	2270231	0.113636	0.113636	-0.0239	MODIFIER	intergenic_region	DLA-DQB1-ENSCAFG00000020749
-	chr12	2270424	-0.113636	0.113636	-0.0239	MODIFIER	intergenic_region	DLA-DQB1-ENSCAFG00000020749
-	chr12	2270868	-0.026515	0.026515	-0.0447	MODIFIER	intergenic_region	DLA-DQB1-ENSCAFG00000020749
-	chr12	2271108	-0.026515	0.026515	-0.0349	MODIFIER	intergenic_region	DLA-DQB1-ENSCAFG00000020749
-	chr12	2271109	-0.026515	0.026515	-0.0349	MODIFIER	intergenic_region	DLA-DQB1-ENSCAFG00000020749
-	chr12	2271113	-0.026515	0.026515	-0.0349	MODIFIER	intergenic_region	DLA-DQB1-ENSCAFG00000020749
-	chr12	2271165	-0.060606	0.060606	-0.0372	MODIFIER	intergenic_region	DLA-DQB1-ENSCAFG00000020749
-	chr12	2271562	0	0	-0.0427	MODIFIER	intergenic_region	DLA-DQB1-ENSCAFG00000020749
-	chr12	2273141	-0.01894	0.01894	-0.0382	MODIFIER	intergenic_region	DLA-DQB1-ENSCAFG00000020749
-	chr12	2273466	-0.01894	0.01894	-0.0382	MODIFIER	intergenic_region	DLA-DQB1-ENSCAFG00000020749
-	chr12	2273731	0	0	#NAME?	MODIFIER	intergenic_region	DLA-DQB1-ENSCAFG00000020749
-	chr12	2274212	-0.041667	0.041667	-0.0384	MODIFIER	intergenic_region	DLA-DQB1-ENSCAFG00000020749
-	chr12	2275276	0	0	0	MODIFIER	intergenic_region	DLA-DQB1-ENSCAFG00000020749
-	chr12	2276357	0.01894	0.01894	-0.0382	MODIFIER	intergenic_region	DLA-DQB1-ENSCAFG00000020749
-	chr12	2276902	0.060606	0.060606	-0.0372	MODIFIER	intergenic_region	DLA-DQB1-ENSCAFG00000020749
-	chr12	2276903	0.060606	0.060606	-0.0372	MODIFIER	intergenic_region	DLA-DQB1-ENSCAFG00000020749
-	chr12	2278759	-0.01894	0.01894	-0.0382	MODIFIER	intergenic_region	DLA-DQB1-ENSCAFG00000020749
-	chr12	2278878	0.022727	0.022727	-0.0402	MODIFIER	intergenic_region	DLA-DQB1-ENSCAFG00000020749
-	chr12	2279708	-0.01894	0.01894	-0.0382	MODIFIER	intergenic_region	DLA-DQB1-ENSCAFG00000020749
-	chr12	2280097	0.022727	0.022727	-0.0402	MODIFIER	intergenic_region	DLA-DQB1-ENSCAFG00000020749
-	chr12	2280664	-0.045455	0.045455	-0.0455	MODIFIER	intergenic_region	DLA-DQB1-ENSCAFG00000020749
-	chr12	2281496	-0.056818	0.056818	-0.0512	MODIFIER	intergenic_region	DLA-DQB1-ENSCAFG00000020749
-	chr12	2281691	0.090909	0.090909	0.0558	MODIFIER	intergenic_region	DLA-DQB1-ENSCAFG00000020749
-	chr12	2281783	-0.0454545	0.0454545	-0.0046	MODIFIER	intergenic_region	DLA-DQB1-ENSCAFG00000020749
-	chr12	2281786	-0.0454545	0.0454545	-0.0046	MODIFIER	intergenic_region	DLA-DQB1-ENSCAFG00000020749
-	chr12	2282261	-0.272728	0.272728	0.0833	MODIFIER	intergenic_region	DLA-DQB1-ENSCAFG00000020749
-	chr12	2282292	-0.01894	0.01894	-0.0689	MODIFIER	intergenic_region	DLA-DQB1-ENSCAFG00000020749
-	chr12	2282316	-0.033333	0.033333	-0.0664	MODIFIER	intergenic_region	DLA-DQB1-ENSCAFG00000020749
-	chr12	2282546	-0.026515	0.026515	-0.0447	MODIFIER	intergenic_region	DLA-DQB1-ENSCAFG00000020749
-	chr12	2282618	0.01894	0.01894	-0.0382	MODIFIER	intergenic_region	DLA-DQB1-ENSCAFG00000020749
-	chr12	2283005	0	0	-0.0427	MODIFIER	intergenic_region	DLA-DQB1-ENSCAFG00000020749
-	chr12	2283095	-0.027273	0.027273	-0.042	MODIFIER	intergenic_region	DLA-DQB1-ENSCAFG00000020749
-	chr12	2283155	0.01894	0.01894	-0.0382	MODIFIER	intergenic_region	DLA-DQB1-ENSCAFG00000020749
-	chr12	2284144	-0.181818	0.181818	0.0272	MODIFIER	intergenic_region	DLA-DQB1-ENSCAFG00000020749
-	chr12	2284156	-0.045455	0.045455	-0.0182	MODIFIER	intergenic_region	DLA-DQB1-ENSCAFG00000020749
-	chr12	2284173	-0.022727	0.022727	-0.054	MODIFIER	intergenic_region	DLA-DQB1-ENSCAFG00000020749
-	chr12	2284192	0.007576	0.007576	-0.0226	MODIFIER	intergenic_region	DLA-DQB1-ENSCAFG00000020749
-	chr12	2284263	0.026515	0.026515	-0.0469	MODIFIER	intergenic_region	DLA-DQB1-ENSCAFG00000020749
-	chr12	2284293	0	0	#NAME?	MODIFIER	intergenic_region	DLA-DQB1-ENSCAFG00000020749
-	chr12	2284336	0.015151	0.015151	-0.0618	MODIFIER	intergenic_region	DLA-DQB1-ENSCAFG00000020749
-	chr12	2284622	0.05	0.05	0.005	MODIFIER	intergenic_region	DLA-DQB1-ENSCAFG00000020749
-	chr12	2284637	0.05	0.05	0.005	MODIFIER	intergenic_region	DLA-DQB1-ENSCAFG00000020749
-	chr12	2284665	-0.041667	0.041667	-0.0038	MODIFIER	intergenic_region	DLA-DQB1-ENSCAFG00000020749
-	chr12	2284672	0.0416667	0.0416667	-0.0038	MODIFIER	intergenic_region	DLA-DQB1-ENSCAFG00000020749
-	chr12	2284697	-0.041667	0.041667	-0.0038	MODIFIER	intergenic_region	DLA-DQB1-ENSCAFG00000020749
-	chr12	2285382	-0.122727	0.122727	-0.0207	MODIFIER	intergenic_region	DLA-DQB1-ENSCAFG00000020749
-	chr12	2285545	0.090909	0.090909	0.0558	MODIFIER	intergenic_region	DLA-DQB1-ENSCAFG00000020749
-	chr12	2285898	-0.068182	0.068182	-0.0385	MODIFIER	intergenic_region	DLA-DQB1-ENSCAFG00000020749
-	chr12	2286041	-0.041667	0.041667	-0.073	MODIFIER	intergenic_region	DLA-DQB1-ENSCAFG00000020749
-	chr12	2286134	0.060606	0.060606	-0.0372	MODIFIER	intergenic_region	DLA-DQB1-ENSCAFG00000020749
-	chr12	2287083	-0.05	0.05	-0.0354	MODIFIER	intergenic_region	DLA-DQB1-ENSCAFG00000020749
-	chr12	2287156	0.01894	0.01894	-0.0382	MODIFIER	intergenic_region	DLA-DQB1-ENSCAFG00000020749
-	chr12	2287656	0.246213	0.246213	0.1397	MODIFIER	intergenic_region	DLA-DQB1-ENSCAFG00000020749
-	chr12	2288101	-0.01894	0.01894	-0.0382	MODIFIER	intergenic_region	DLA-DQB1-ENSCAFG00000020749
-	chr12	2288283	-0.060606	0.060606	-0.0372	MODIFIER	intergenic_region	DLA-DQB1-ENSCAFG00000020749
-	chr12	2288971	-0.01894	0.01894	-0.0382	MODIFIER	intergenic_region	DLA-DQB1-ENSCAFG00000020749
-	chr12	2289070	0.01894	0.01894	-0.0382	MODIFIER	intergenic_region	DLA-DQB1-ENSCAFG00000020749
-	chr12	2289129	-0.01894	0.01894	-0.0382	MODIFIER	intergenic_region	DLA-DQB1-ENSCAFG00000020749
-	chr12	2289387	0.003788	0.003788	-0.0454	MODIFIER	intergenic_region	DLA-DQB1-ENSCAFG00000020749
-	chr12	2289400	0.003788	0.003788	-0.0454	MODIFIER	intergenic_region	DLA-DQB1-ENSCAFG00000020749
-	chr12	2289414	-0.0037878	0.0037878	-0.0454	MODIFIER	intergenic_region	DLA-DQB1-ENSCAFG00000020749
-	chr12	2289415	0.003788	0.003788	-0.0454	MODIFIER	intergenic_region	DLA-DQB1-ENSCAFG00000020749
-	chr12	2289437	-0.0037878	0.0037878	-0.0454	MODIFIER	intergenic_region	DLA-DQB1-ENSCAFG00000020749
-	chr12	2289467	-0.0037878	0.0037878	-0.0454	MODIFIER	intergenic_region	DLA-DQB1-ENSCAFG00000020749
-	chr12	2289530	0.003788	0.003788	-0.0454	MODIFIER	intergenic_region	DLA-DQB1-ENSCAFG00000020749
-	chr12	2289535	0.049242	0.049242	-0.0233	MODIFIER	intergenic_region	DLA-DQB1-ENSCAFG00000020749
-	chr12	2289536	-0.0492424	0.0492424	-0.0233	MODIFIER	intergenic_region	DLA-DQB1-ENSCAFG00000020749
-	chr12	2289566	0.003788	0.003788	-0.0454	MODIFIER	intergenic_region	DLA-DQB1-ENSCAFG00000020749
-	chr12	2289568	0.003788	0.003788	-0.0454	MODIFIER	intergenic_region	DLA-DQB1-ENSCAFG00000020749
-	chr12	2289571	0.003788	0.003788	-0.0454	MODIFIER	intergenic_region	DLA-DQB1-ENSCAFG00000020749
-	chr12	2289577	0.0454545	0.0454545	-0.0046	MODIFIER	intergenic_region	DLA-DQB1-ENSCAFG00000020749
-	chr12	2290225	0.060606	0.060606	-0.05	MODIFIER	intergenic_region	DLA-DQB1-ENSCAFG00000020749
-	chr12	2290272	0.133333	0.133333	-0.0211	MODIFIER	intergenic_region	DLA-DQB1-ENSCAFG00000020749
-	chr12	2292656	0.136364	0.136364	0.0756	MODIFIER	intergenic_region	DLA-DQB1-ENSCAFG00000020749
-	chr12	2292666	0.090909	0.090909	0.0083	MODIFIER	intergenic_region	DLA-DQB1-ENSCAFG00000020749
-	chr12	2292672	-0.041667	0.041667	-0.0038	MODIFIER	intergenic_region	DLA-DQB1-ENSCAFG00000020749
-	chr12	2292673	-0.045455	0.045455	0	MODIFIER	intergenic_region	DLA-DQB1-ENSCAFG00000020749
-	chr12	2292674	0	0	-0.0526	MODIFIER	intergenic_region	DLA-DQB1-ENSCAFG00000020749
-	chr12	2292702	-0.041667	0.041667	-0.0038	MODIFIER	intergenic_region	DLA-DQB1-ENSCAFG00000020749
-	chr12	2292710	0	0	#NAME?	MODIFIER	intergenic_region	DLA-DQB1-ENSCAFG00000020749
-	chr12	2292724	0.045455	0.045455	0.0041	MODIFIER	intergenic_region	DLA-DQB1-ENSCAFG00000020749
-	chr12	2292741	0.045455	0.045455	0.0041	MODIFIER	intergenic_region	DLA-DQB1-ENSCAFG00000020749
-	chr12	2292743	-0.037878	0.037878	-0.0319	MODIFIER	intergenic_region	DLA-DQB1-ENSCAFG00000020749
-	chr12	2292744	0.090909	0.090909	0.0558	MODIFIER	intergenic_region	DLA-DQB1-ENSCAFG00000020749
-	chr12	2292758	-0.083333	0.083333	-0.0076	MODIFIER	intergenic_region	DLA-DQB1-ENSCAFG00000020749
-	chr12	2292785	0.053031	0.053031	-0.0265	MODIFIER	intergenic_region	DLA-DQB1-ENSCAFG00000020749
-	chr12	2292786	0.003788	0.003788	-0.0454	MODIFIER	intergenic_region	DLA-DQB1-ENSCAFG00000020749
-	chr12	2292795	0.049242	0.049242	-0.057	MODIFIER	intergenic_region	DLA-DQB1-ENSCAFG00000020749
-	chr12	2292800	-0.083333	0.083333	-0.0076	MODIFIER	intergenic_region	DLA-DQB1-ENSCAFG00000020749
-	chr12	2292801	0.045455	0.045455	0.0041	MODIFIER	intergenic_region	DLA-DQB1-ENSCAFG00000020749
-	chr12	2292809	0.049242	0.049242	-0.057	MODIFIER	intergenic_region	DLA-DQB1-ENSCAFG00000020749
-	chr12	2292815	0.090909	0.090909	0.0558	MODIFIER	intergenic_region	DLA-DQB1-ENSCAFG00000020749
-	chr12	2292825	0.049242	0.049242	-0.057	MODIFIER	intergenic_region	DLA-DQB1-ENSCAFG00000020749
-	chr12	2292829	0.049242	0.049242	-0.0233	MODIFIER	intergenic_region	DLA-DQB1-ENSCAFG00000020749
-	chr12	2292830	0	0	0	MODIFIER	intergenic_region	DLA-DQB1-ENSCAFG00000020749
-	chr12	2292831	0.045455	0.045455	0.0041	MODIFIER	intergenic_region	DLA-DQB1-ENSCAFG00000020749
-	chr12	2293431	-0.037878	0.037878	-0.0657	MODIFIER	intergenic_region	DLA-DQB1-ENSCAFG00000020749
-	chr12	2293432	-0.037878	0.037878	-0.0657	MODIFIER	intergenic_region	DLA-DQB1-ENSCAFG00000020749
-	chr12	2293443	0.136364	0.136364	0.0756	MODIFIER	intergenic_region	DLA-DQB1-ENSCAFG00000020749
-	chr12	2293451	0.045455	0.045455	0	MODIFIER	intergenic_region	DLA-DQB1-ENSCAFG00000020749
-	chr12	2293457	-0.041667	0.041667	-0.0038	MODIFIER	intergenic_region	DLA-DQB1-ENSCAFG00000020749
-	chr12	2293459	0.045455	0.045455	0.0041	MODIFIER	intergenic_region	DLA-DQB1-ENSCAFG00000020749
-	chr12	2293463	-0.041667	0.041667	-0.0038	MODIFIER	intergenic_region	DLA-DQB1-ENSCAFG00000020749
-	chr12	2293464	-0.041667	0.041667	-0.0038	MODIFIER	intergenic_region	DLA-DQB1-ENSCAFG00000020749
-	chr12	2293467	0.003788	0.003788	-0.0454	MODIFIER	intergenic_region	DLA-DQB1-ENSCAFG00000020749
-	chr12	2293471	0.090909	0.090909	0.0558	MODIFIER	intergenic_region	DLA-DQB1-ENSCAFG00000020749
-	chr12	2293477	0.090909	0.090909	-0.0195	MODIFIER	intergenic_region	DLA-DQB1-ENSCAFG00000020749
-	chr12	2293485	0.049242	0.049242	-0.0233	MODIFIER	intergenic_region	DLA-DQB1-ENSCAFG00000020749
-	chr12	2293488	0.045455	0.045455	0.0041	MODIFIER	intergenic_region	DLA-DQB1-ENSCAFG00000020749
-	chr12	2306006	-0.265151	0.265151	0.1081	MODIFIER	intergenic_region	DLA-DQB1-ENSCAFG00000020749
-	chr12	2306882	-0.204545	0.204545	0.0693	MODIFIER	intergenic_region	DLA-DQB1-ENSCAFG00000020749
-	chr12	2306936	0.007576	0.007576	-0.0689	MODIFIER	intergenic_region	DLA-DQB1-ENSCAFG00000020749
-	chr12	2307778	0.022727	0.022727	-0.0402	MODIFIER	intergenic_region	DLA-DQB1-ENSCAFG00000020749
-	chr12	2308173	0.01894	0.01894	-0.0382	MODIFIER	intergenic_region	DLA-DQB1-ENSCAFG00000020749
-	chr12	2308193	-0.01894	0.01894	-0.0382	MODIFIER	intergenic_region	DLA-DQB1-ENSCAFG00000020749
-	chr12	2308286	-0.01894	0.01894	-0.0382	MODIFIER	intergenic_region	DLA-DQB1-ENSCAFG00000020749
-	chr12	2308439	-0.01894	0.01894	-0.0382	MODIFIER	intergenic_region	DLA-DQB1-ENSCAFG00000020749
-	chr12	2308687	-0.026515	0.026515	-0.0447	MODIFIER	intergenic_region	DLA-DQB1-ENSCAFG00000020749
-	chr12	2308759	0.01894	0.01894	-0.0382	MODIFIER	intergenic_region	DLA-DQB1-ENSCAFG00000020749
-	chr12	2308884	0	0	0	MODIFIER	intergenic_region	DLA-DQB1-ENSCAFG00000020749
-	chr12	2309006	0.01894	0.01894	-0.0484	MODIFIER	intergenic_region	DLA-DQB1-ENSCAFG00000020749
-	chr12	2309024	0.01894	0.01894	-0.0382	MODIFIER	intergenic_region	DLA-DQB1-ENSCAFG00000020749
-	chr12	2309221	0.022727	0.022727	-0.0402	MODIFIER	intergenic_region	DLA-DQB1-ENSCAFG00000020749
-	chr12	2309501	0.068182	0.068182	-0.0372	MODIFIER	intergenic_region	DLA-DQB1-ENSCAFG00000020749
-	chr12	2309899	-0.10606	0.10606	-0.02	MODIFIER	intergenic_region	DLA-DQB1-ENSCAFG00000020749
-	chr12	2310064	-0.01894	0.01894	-0.0382	MODIFIER	intergenic_region	DLA-DQB1-ENSCAFG00000020749
-	chr12	2310296	0.01894	0.01894	-0.0382	MODIFIER	intergenic_region	DLA-DQB1-ENSCAFG00000020749
-	chr12	2311324	0.01894	0.01894	-0.0382	MODIFIER	intergenic_region	DLA-DQB1-ENSCAFG00000020749
-	chr12	2312946	-0.01894	0.01894	-0.0484	MODIFIER	intergenic_region	DLA-DQB1-ENSCAFG00000020749
-	chr12	2313908	0.136364	0.136364	0.1072	MODIFIER	downstream_gene_variant	ENSCAFG00000020749
-	chr12	2313948	0.022727	0.022727	-0.0294	MODIFIER	downstream_gene_variant	ENSCAFG00000020749
-	chr12	2313971	-0.060606	0.060606	-0.0177	MODIFIER	downstream_gene_variant	ENSCAFG00000020749
-	chr12	2313985	-0.060606	0.060606	-0.0177	MODIFIER	downstream_gene_variant	ENSCAFG00000020749
-	chr12	2313987	-0.060606	0.060606	-0.0177	MODIFIER	downstream_gene_variant	ENSCAFG00000020749
-	chr12	2314017	0.026515	0.026515	-0.0251	MODIFIER	downstream_gene_variant	ENSCAFG00000020749
-	chr12	2314029	-0.01894	0.01894	-0.028	MODIFIER	downstream_gene_variant	ENSCAFG00000020749
-	chr12	2314039	-0.064394	0.064394	-0.0195	MODIFIER	downstream_gene_variant	ENSCAFG00000020749
-	chr12	2314047	-0.030303	0.030303	-0.0354	MODIFIER	downstream_gene_variant	ENSCAFG00000020749
-	chr12	2314211	0.030303	0.030303	-0.0354	MODIFIER	downstream_gene_variant	ENSCAFG00000020749
-	chr12	2314222	-0.015151	0.015151	-0.0368	MODIFIER	downstream_gene_variant	ENSCAFG00000020749
-	chr12	2314246	0.060606	0.060606	-0.0237	MODIFIER	downstream_gene_variant	ENSCAFG00000020749
-	chr12	2315001	-0.10606	0.10606	-0.02	MODIFIER	downstream_gene_variant	ENSCAFG00000020749
